# Supplementary material for: Iron catalyzed β-C(sp2)–H alkylation of enamides
Source: Royal Society of Chemistry journal article supplement (doi:10.1039/d1nj03673d), 2021-01-01

## Supporting Information

### Iron Catalyzed $\beta\text{C}(sp^2)\text{-H}$ Alkylation of Enamides

**Sylvain Bertho,<sup>a</sup> Radhouan Maazaoui,<sup>a</sup> Damla Torun,<sup>a</sup> Ismaël Dondasse,<sup>a</sup> Raoudha Abderrahim,<sup>b</sup> Cyril Nicolas<sup>a\*</sup> and  
Isabelle Gillaizeau<sup>a\*</sup>**

<sup>a</sup>Institut de Chimie Organique et Analytique, UMR 7311 CNRS, rue de Chartes, Université d'Orléans, F-45067 Orléans Cedex 2, France; sylvain-bertho@wanadoo.fr (S.B.); radhouan.maazaoui@hotmail.com (R.M.); damla.torun@univ-orleans.fr (D.T.); ismaelfelixdondasse@gmail.com (I.D.); cyril.nicolas@univ-orleans.fr (C.N.); isabelle.gillaizeau@univ-orleans.fr (I.G.)

<sup>b</sup>Université de Carthage, Faculté des Sciences de Bizerte, Laboratoire de Synthèse Hétérocyclique, 7021 Jarzouna, Bizerte, Tunisia  
Correspondence: isabelle.gillaizeau@univ-orleans.fr; Tel.: +33 (0)2 38 49 45 83

$^1\text{H}$  NMR (400 MHz,  $\text{CDCl}_3/\text{TMS}$ ) Spectrum of Compound 3a.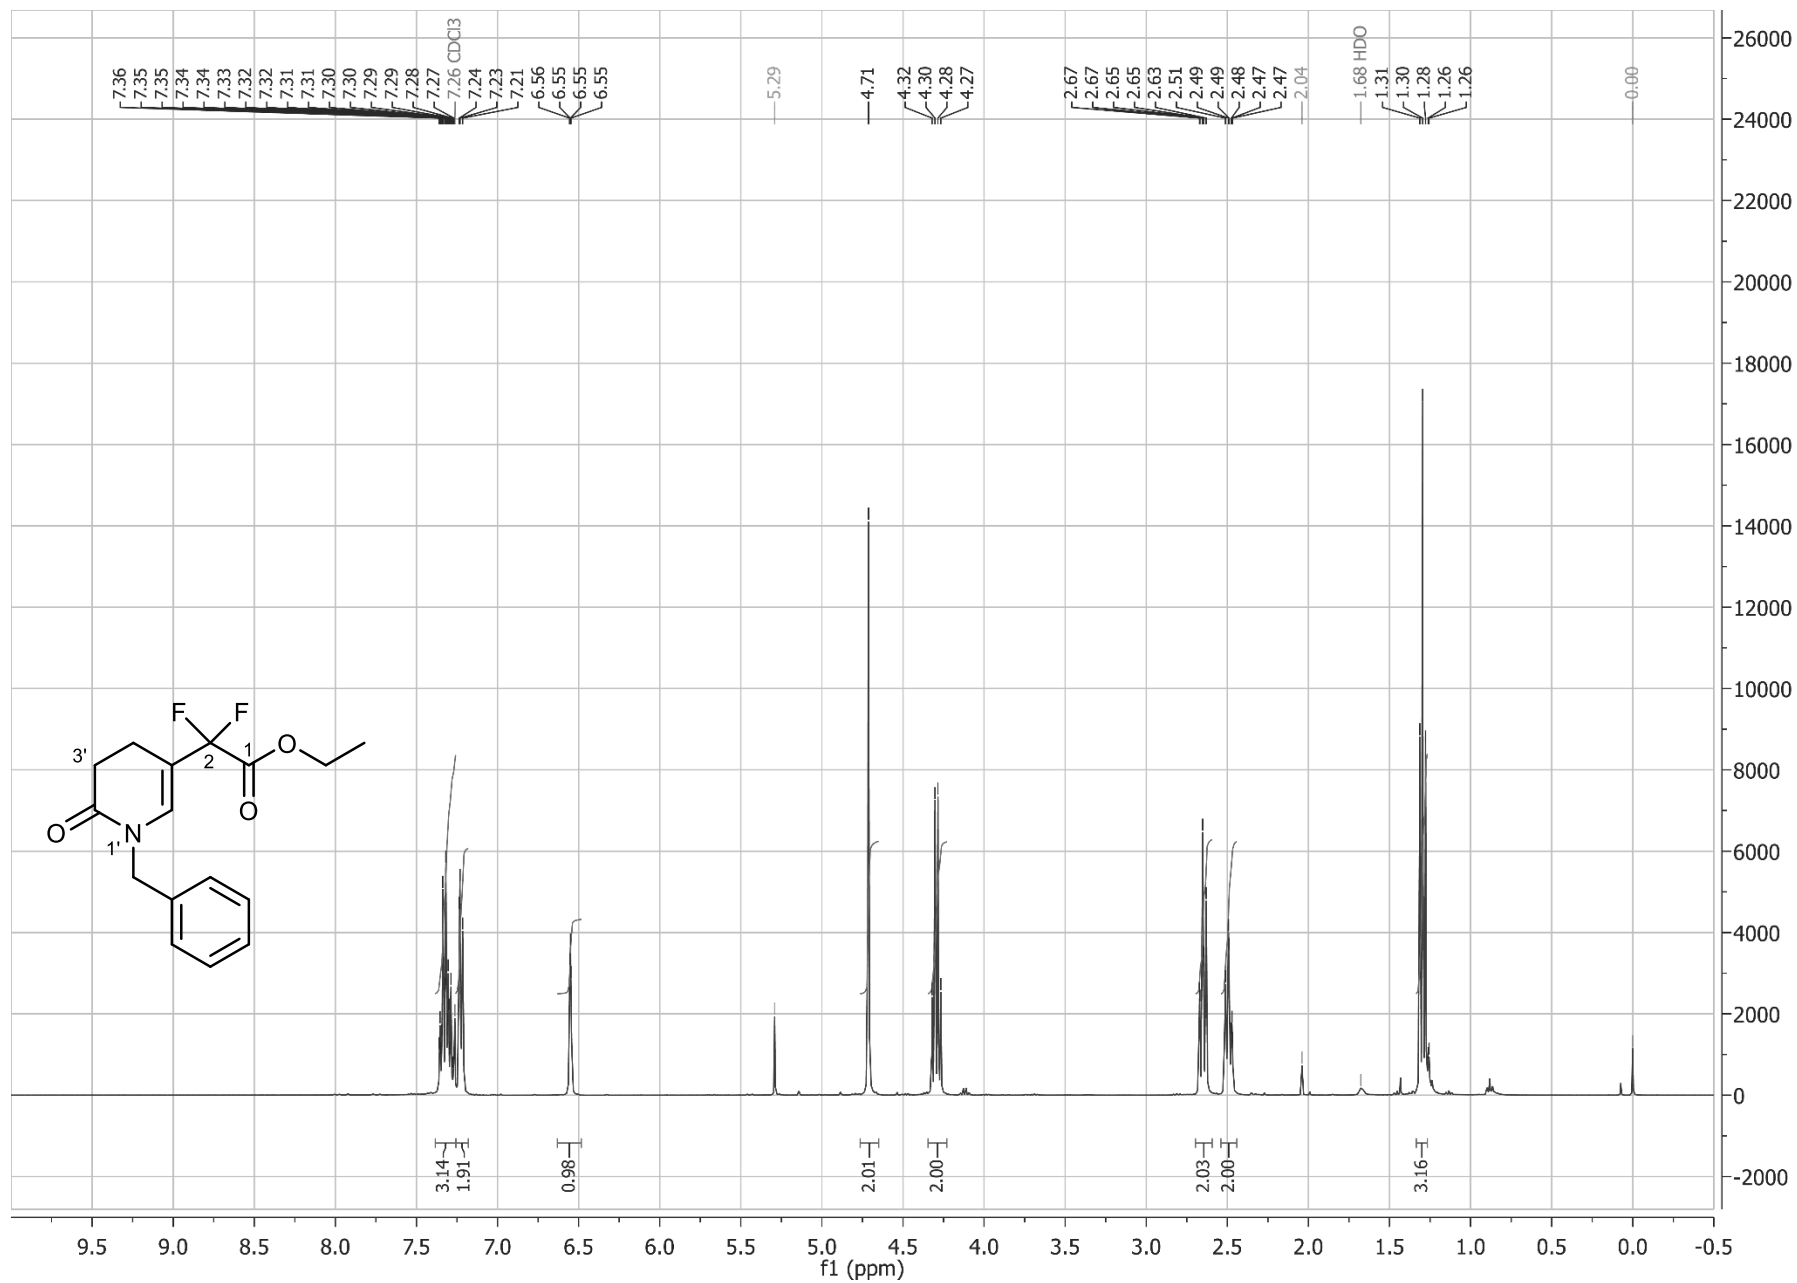

**$^{13}\text{C}$  NMR (101 MHz,  $\text{CDCl}_3$ ) Spectrum of Compound 3a.**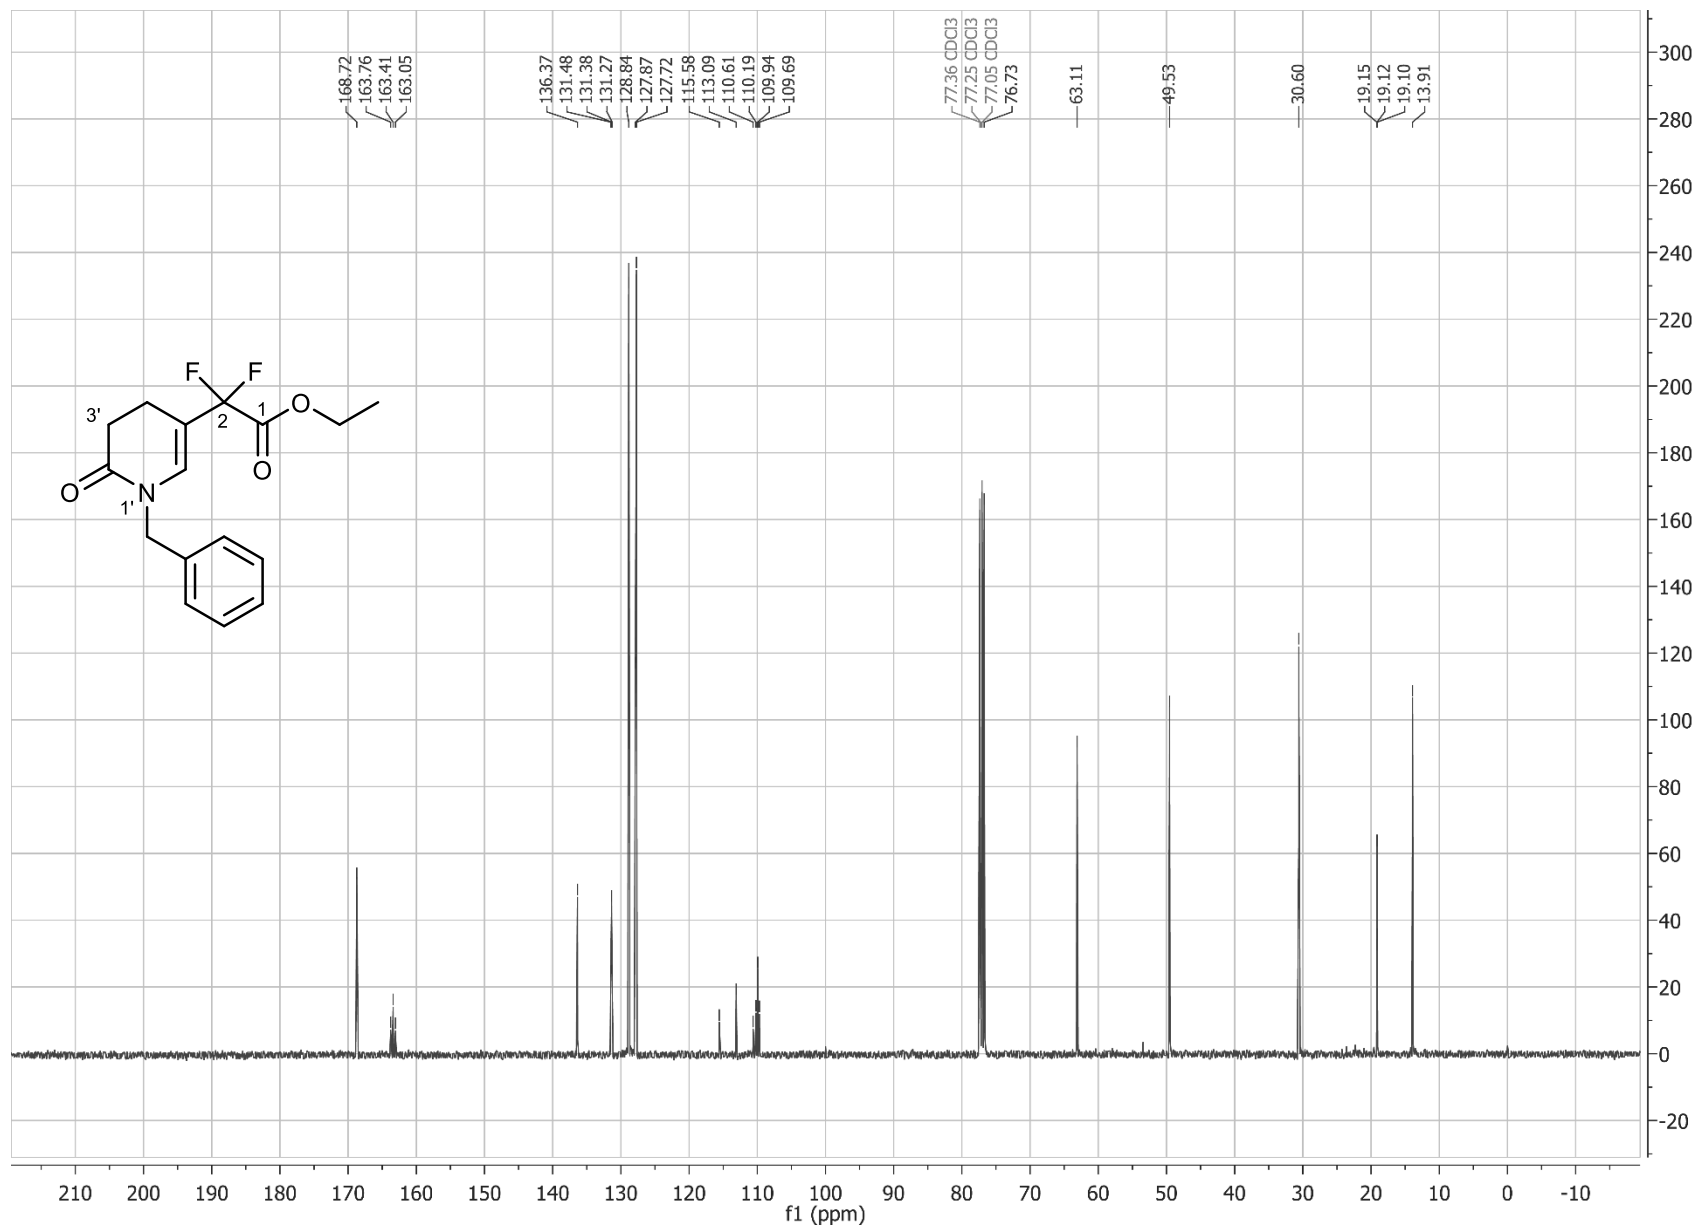

$^1\text{H}$  NMR (700 MHz,  $\text{CDCl}_3$ ) Spectrum of Compound 3b.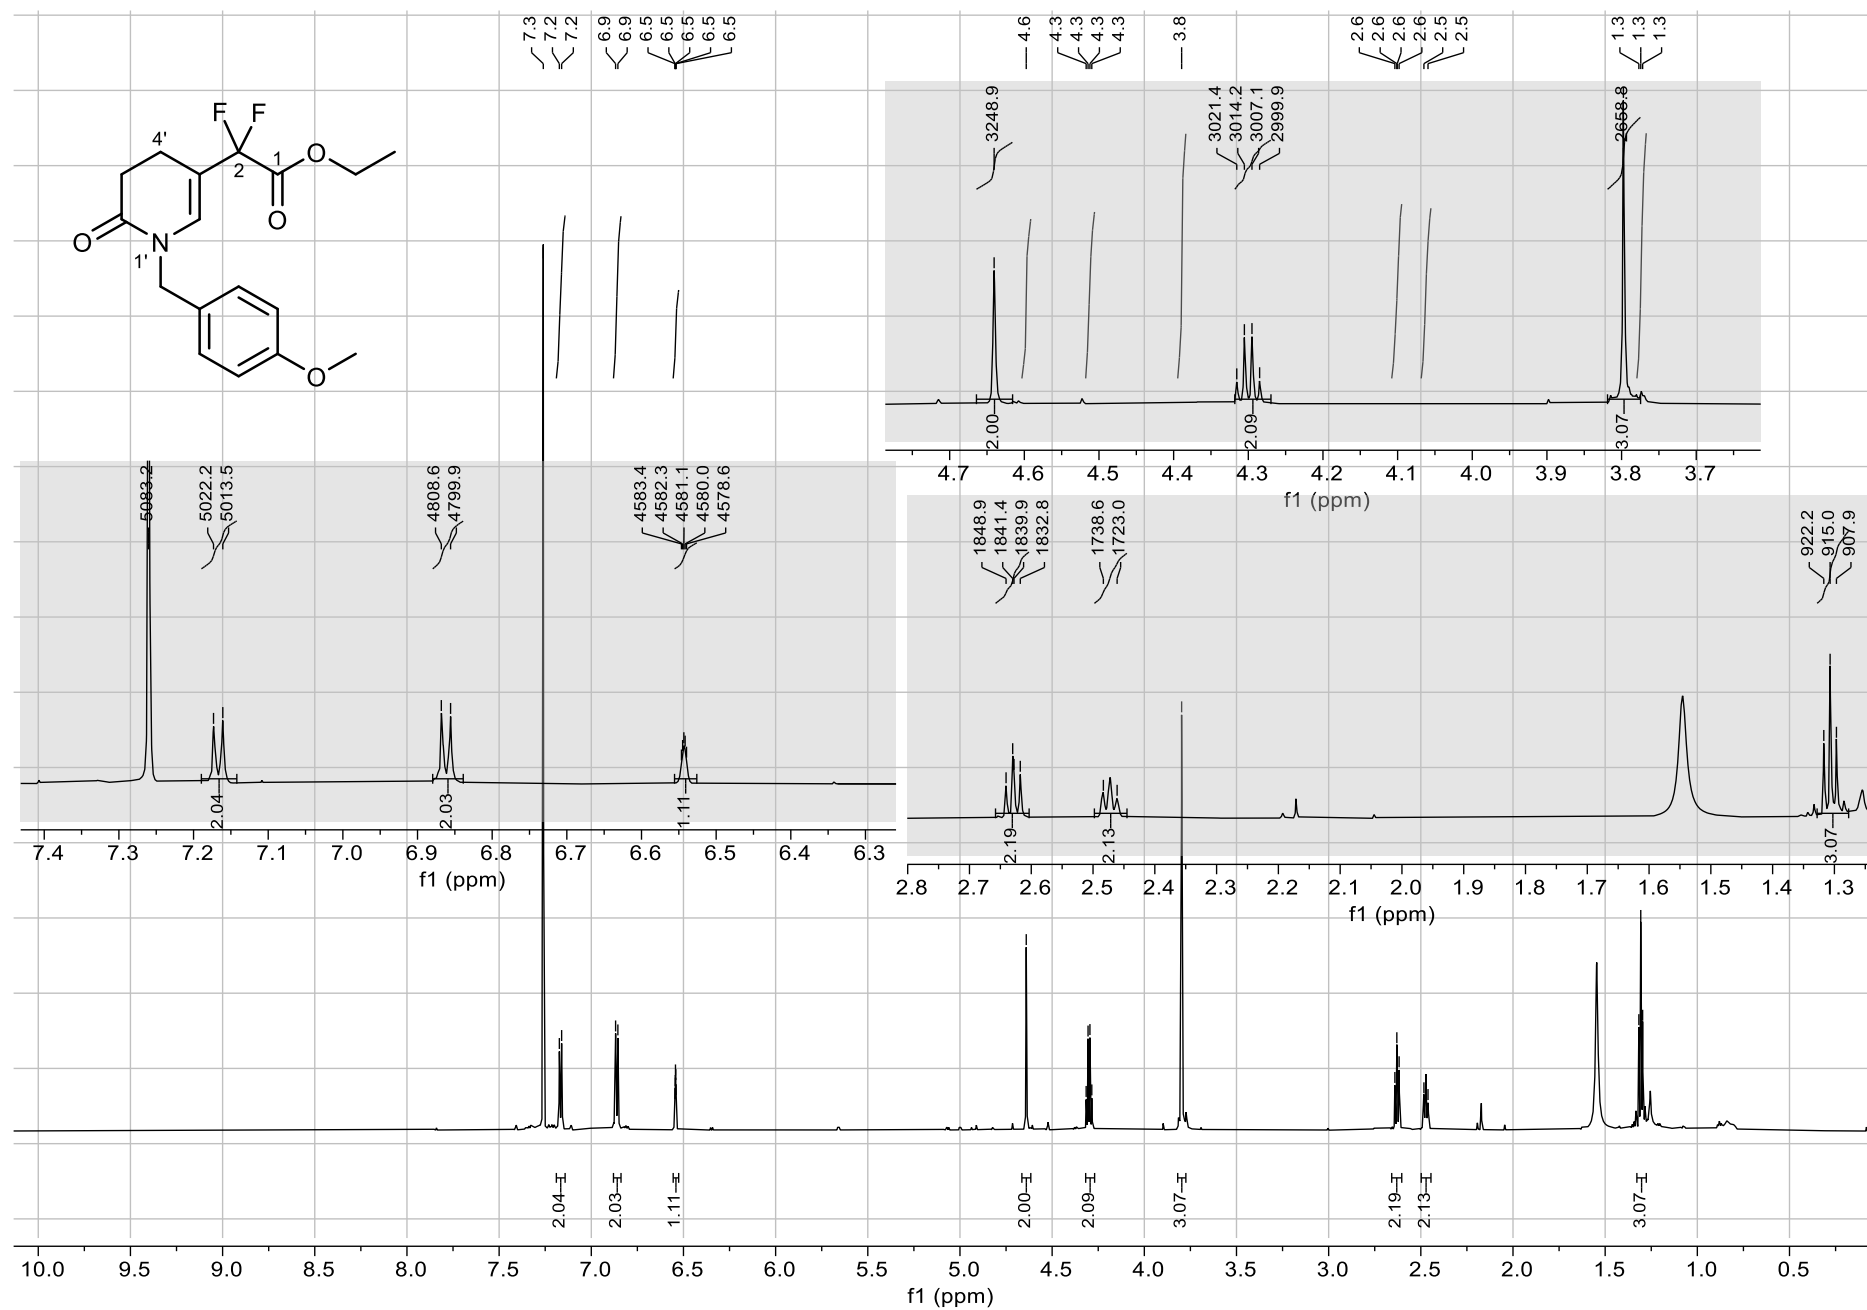

**$^{13}\text{C}$  NMR (176 MHz,  $\text{CDCl}_3$ ) Spectrum of Compound 3b.**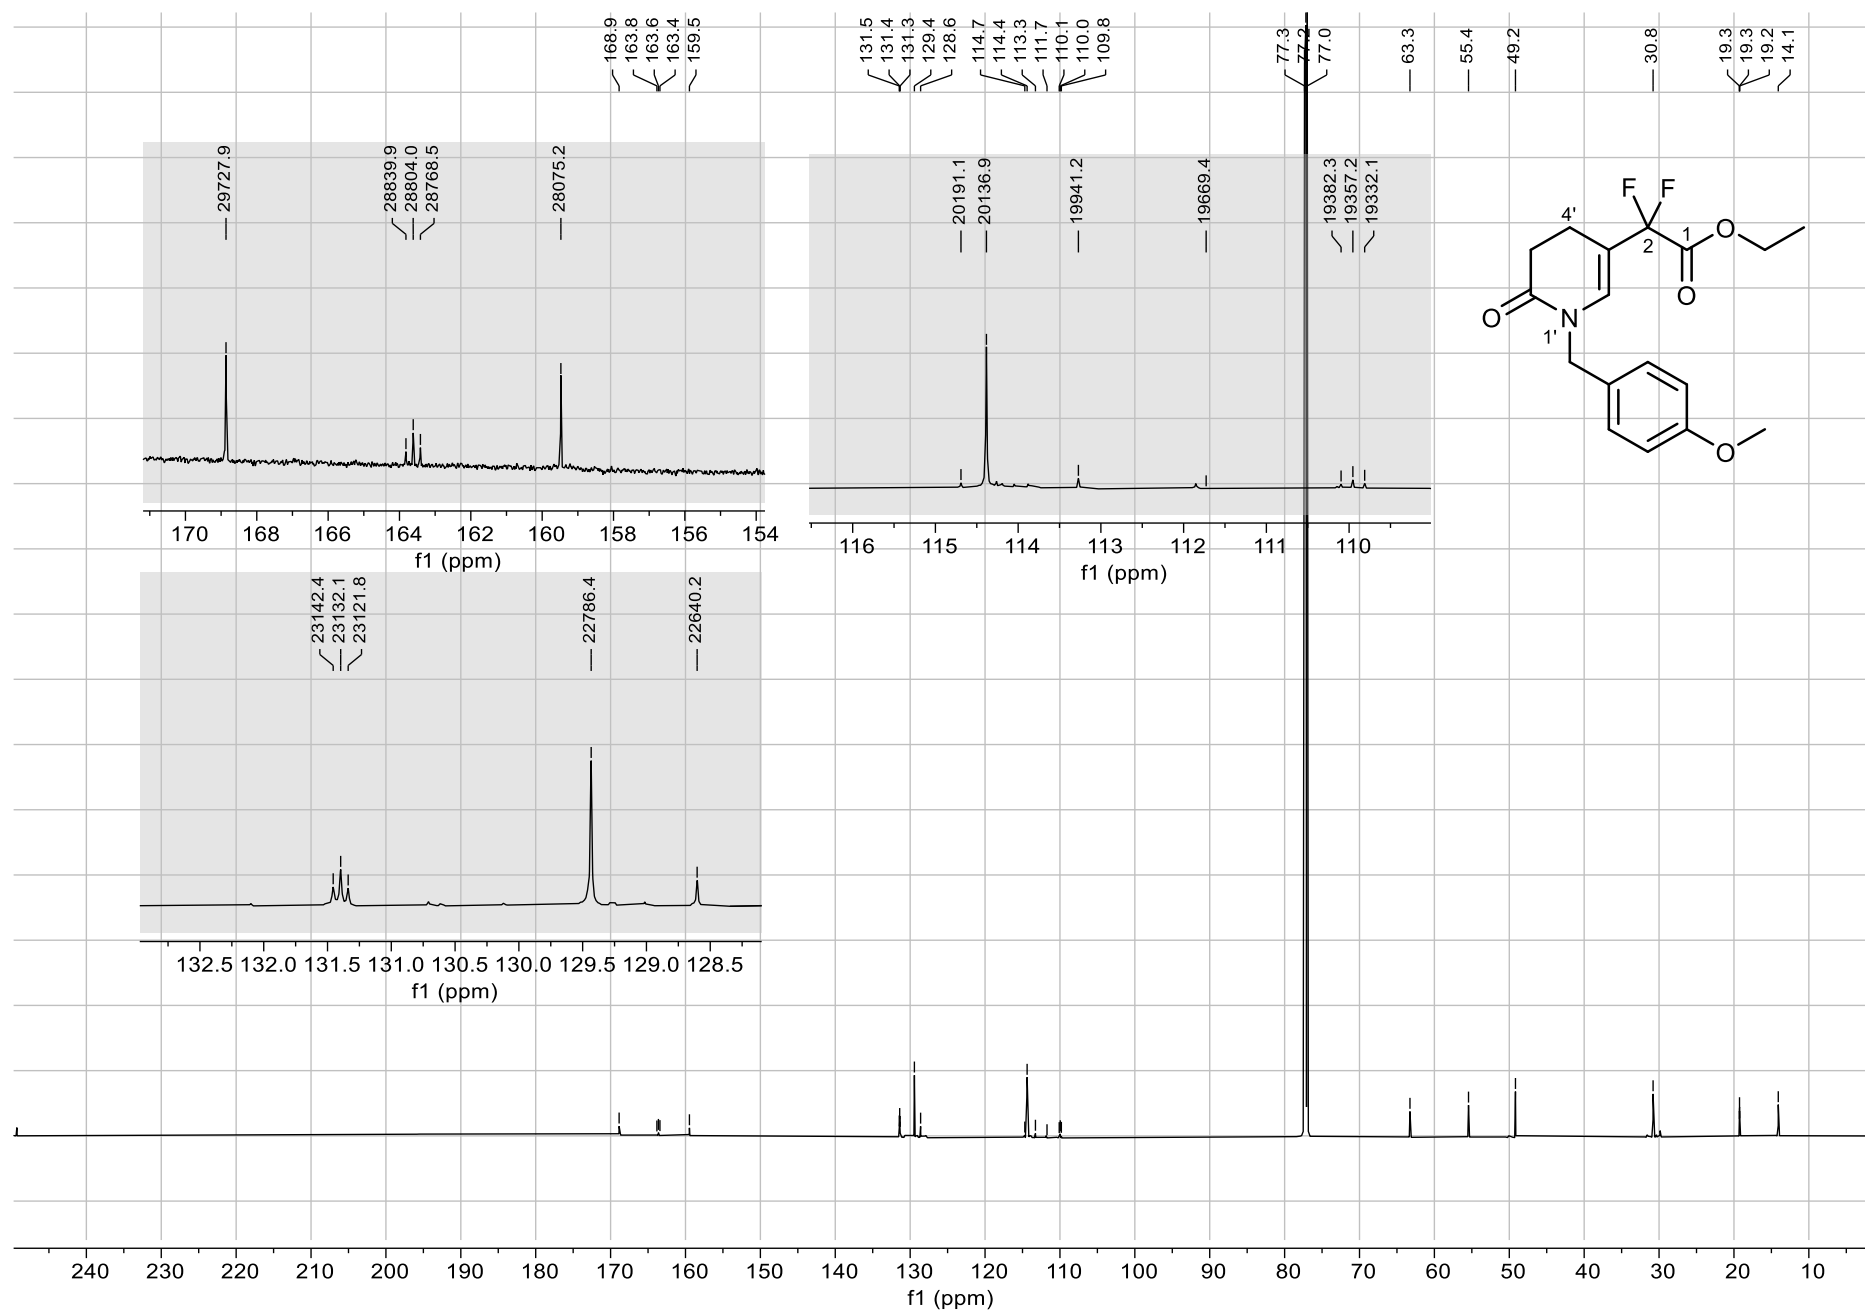

**$^{19}\text{F}$  NMR (235 MHz,  $\text{CDCl}_3$ ) Spectrum of Compound 3b.**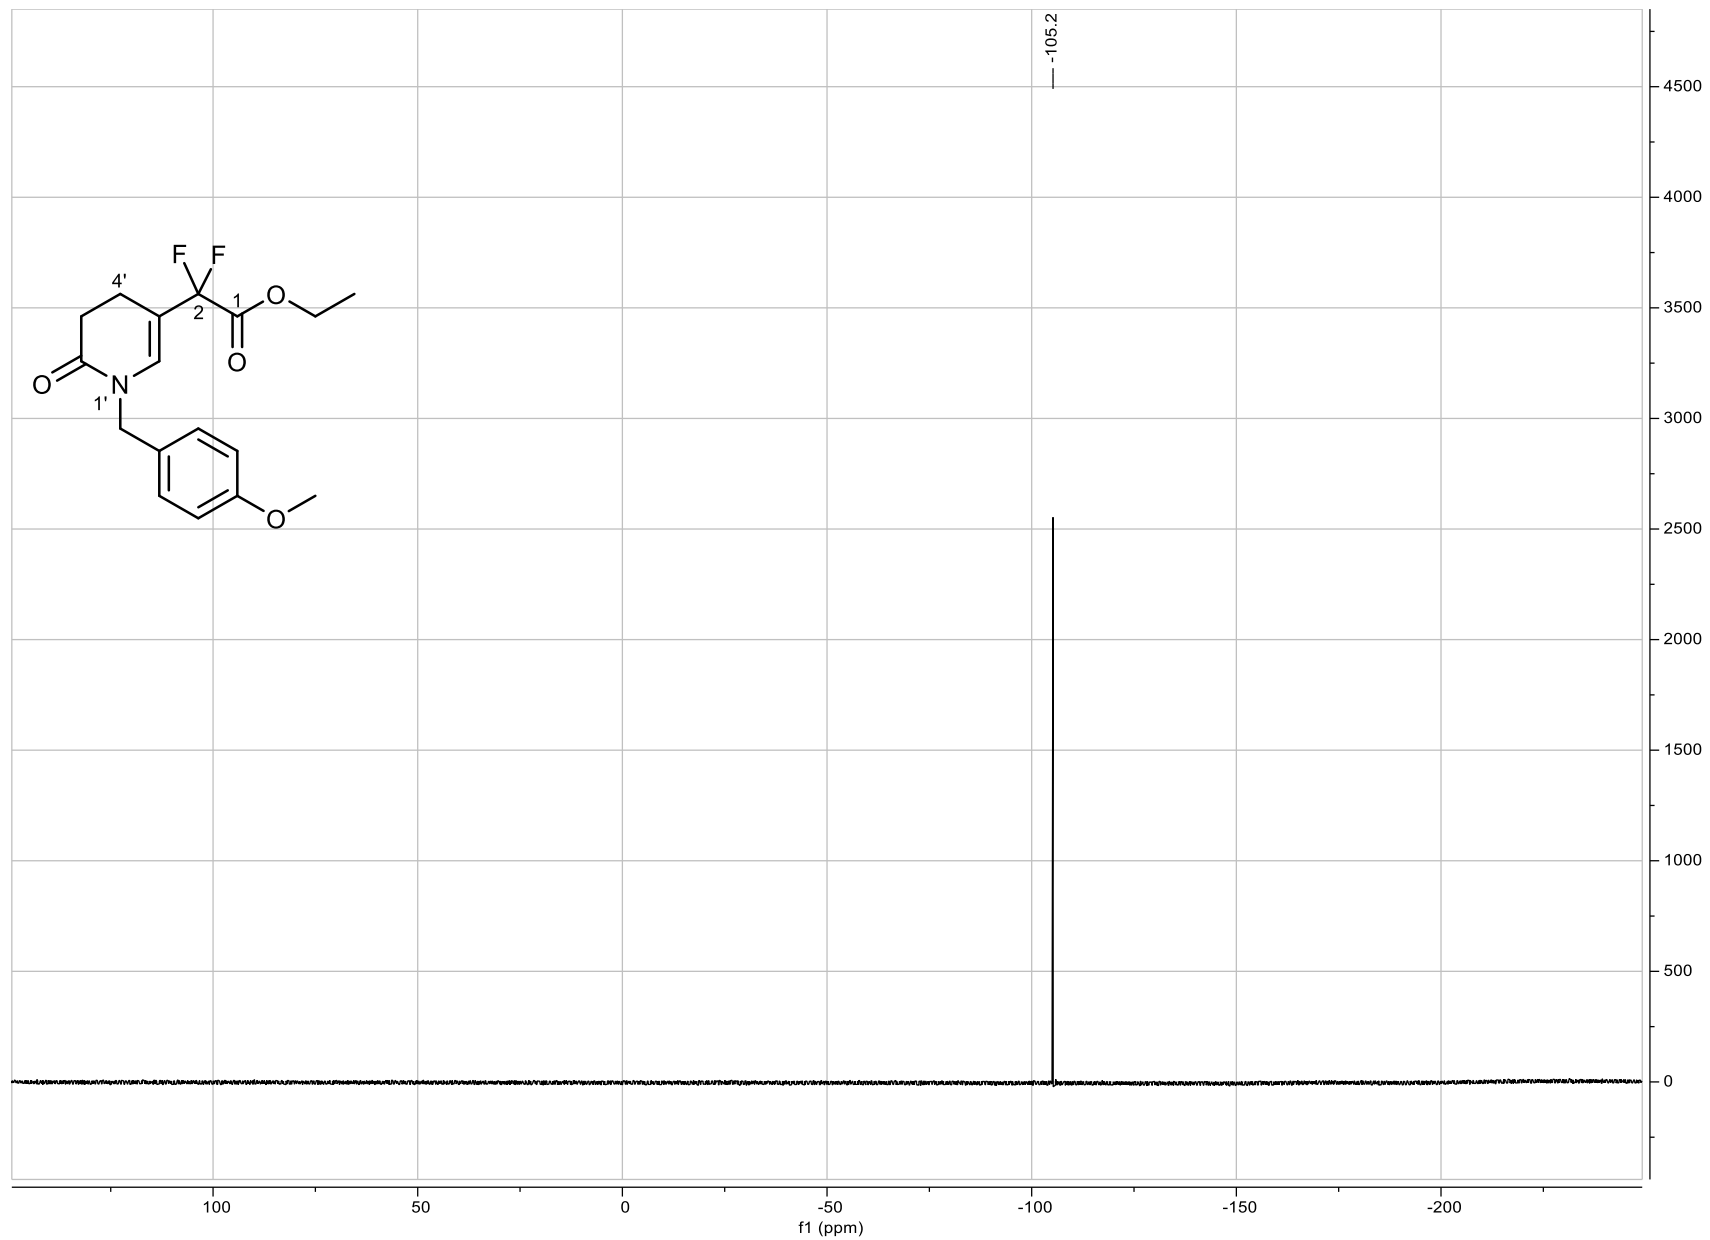

$^1\text{H}$  NMR (400 MHz,  $\text{CDCl}_3/\text{TMS}$ ) Spectrum of Compound 3c.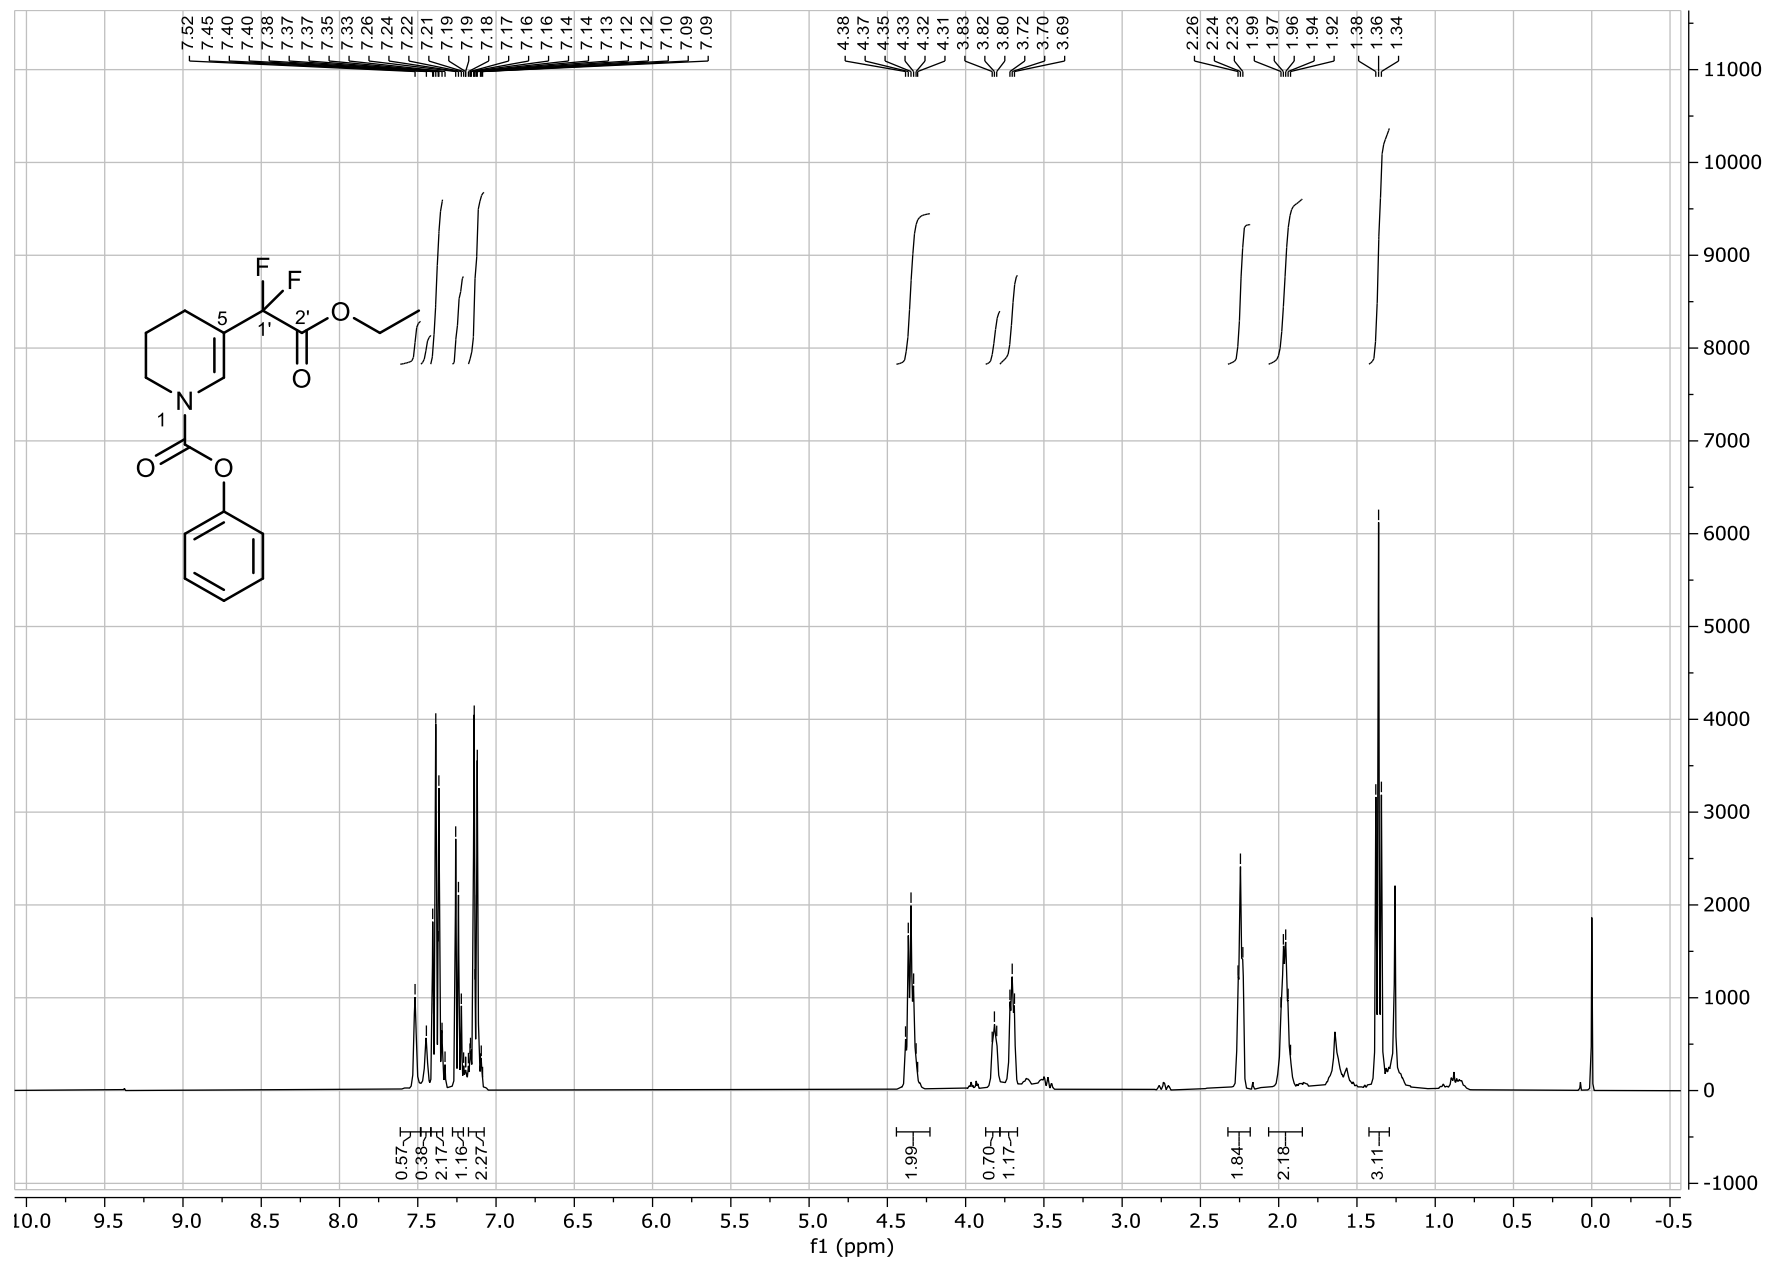

**$^{13}\text{C}$  NMR (101 MHz,  $\text{CDCl}_3$ ) Spectrum of Compound 3c.**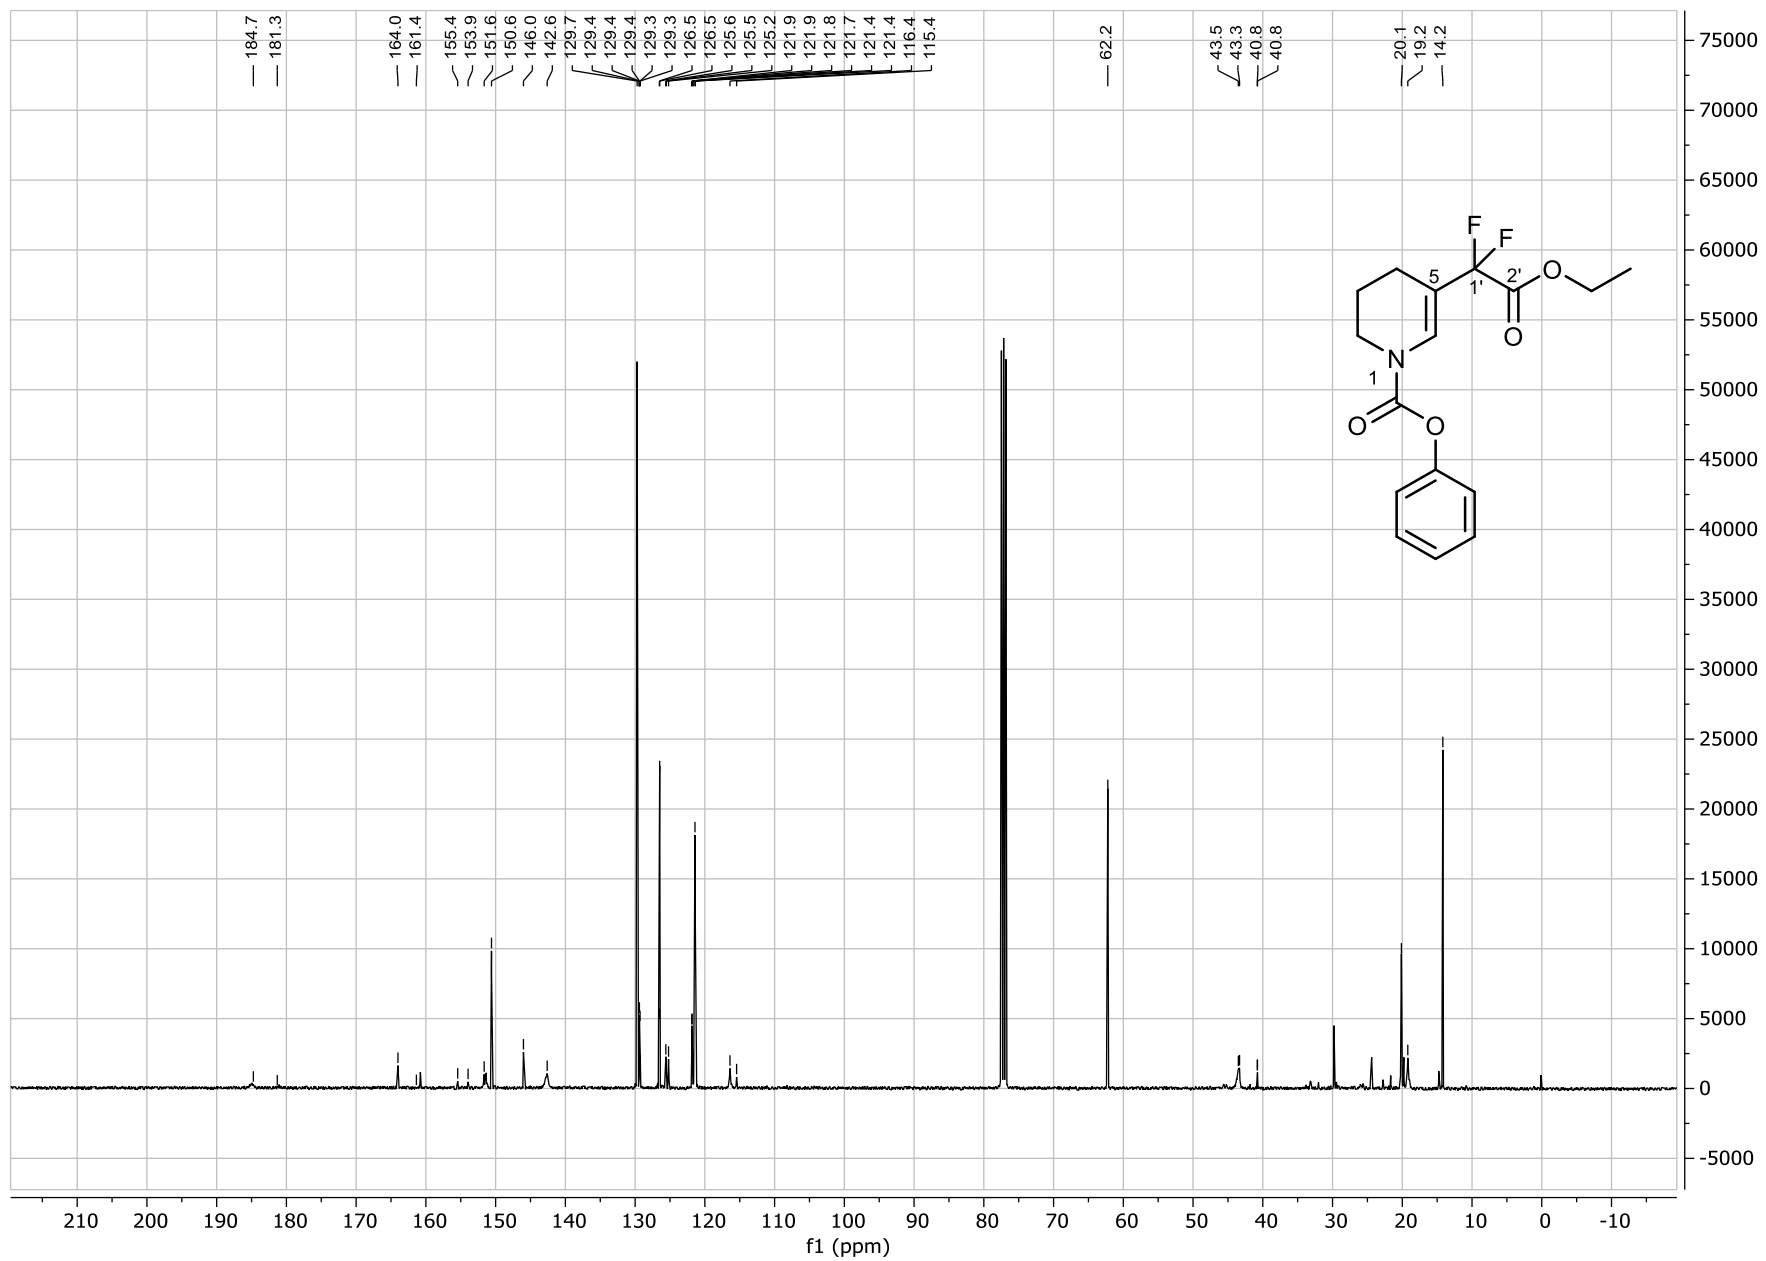



**$^{19}\text{F}$  NMR (376 MHz,  $\text{CDCl}_3$ ) Spectrum of Compound 3c.**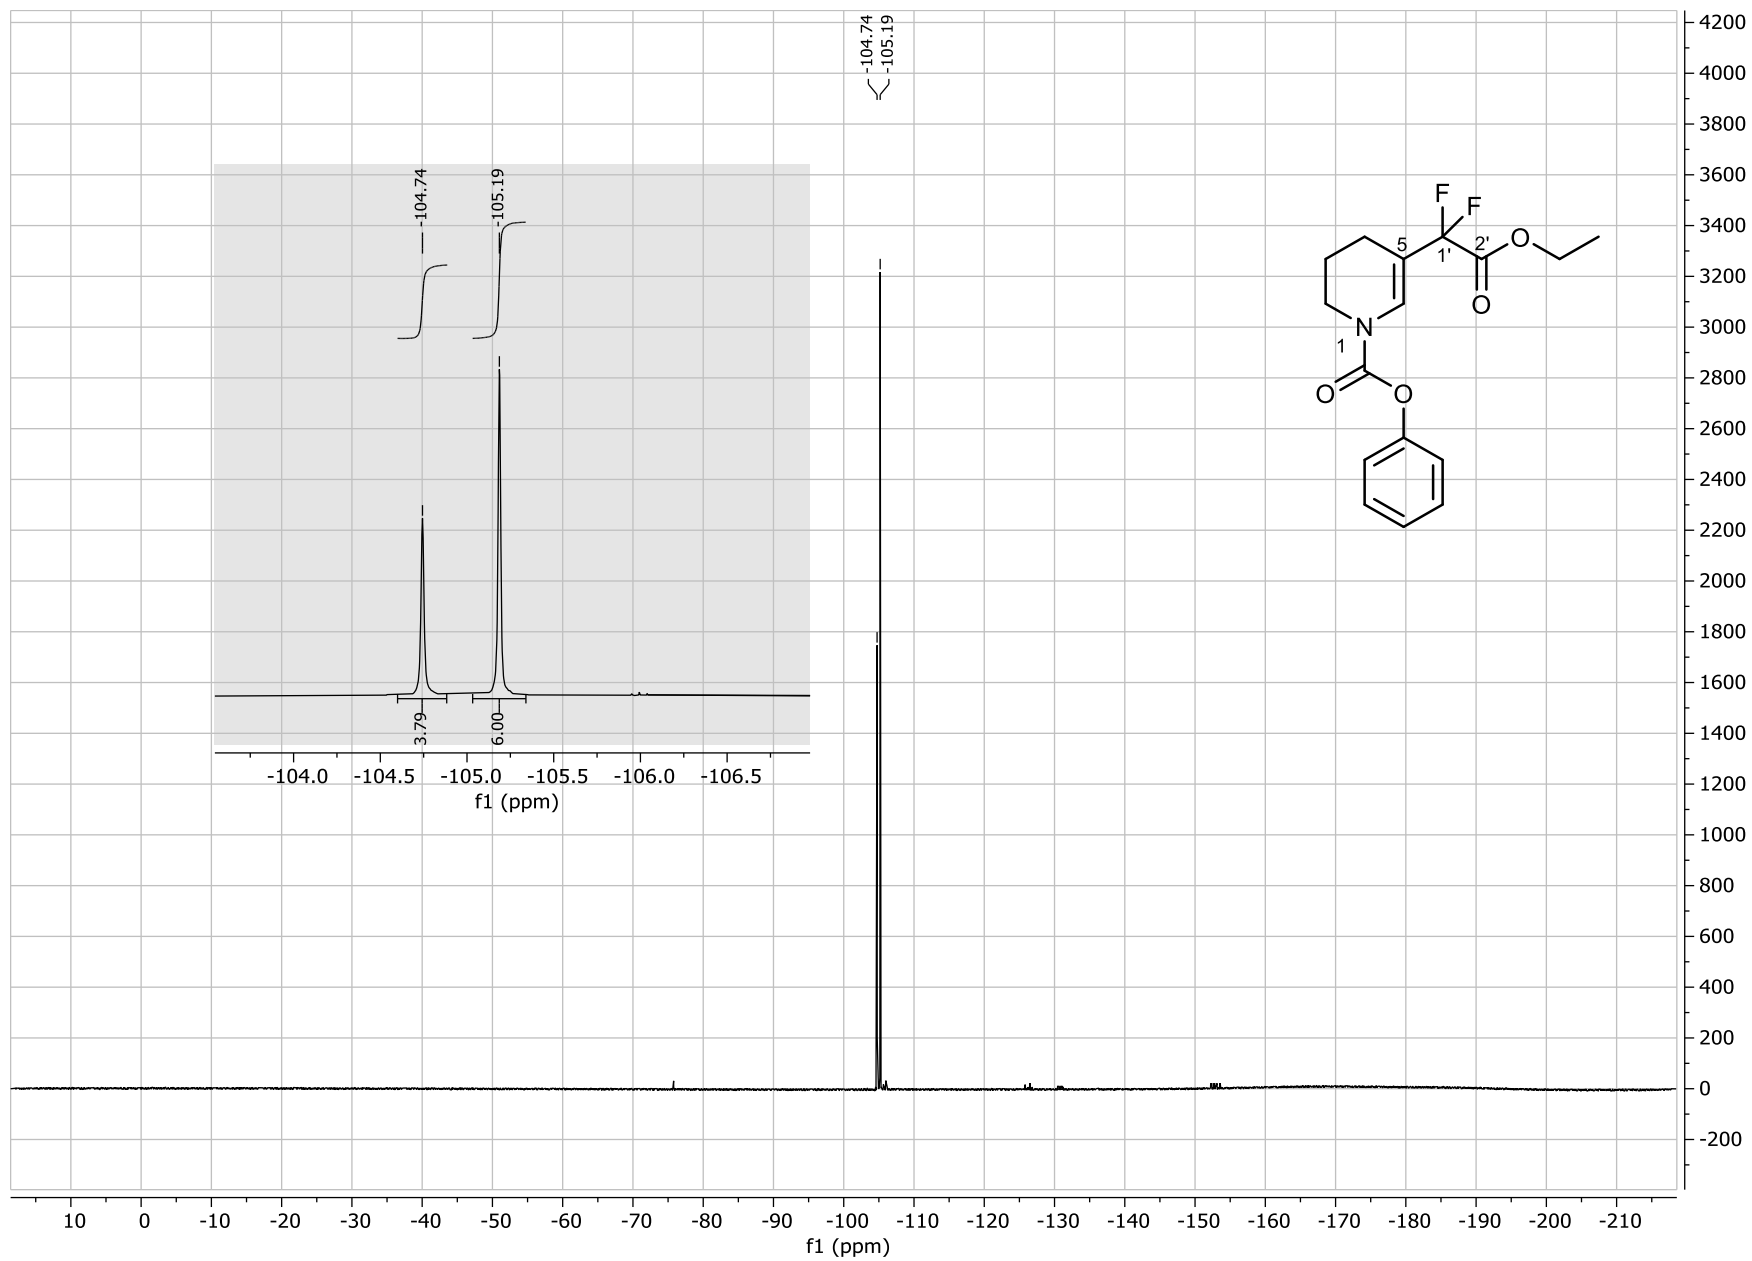

$^1\text{H}$  NMR (250 MHz,  $\text{CDCl}_3/\text{TMS}$ ) Spectrum of Compound 3d.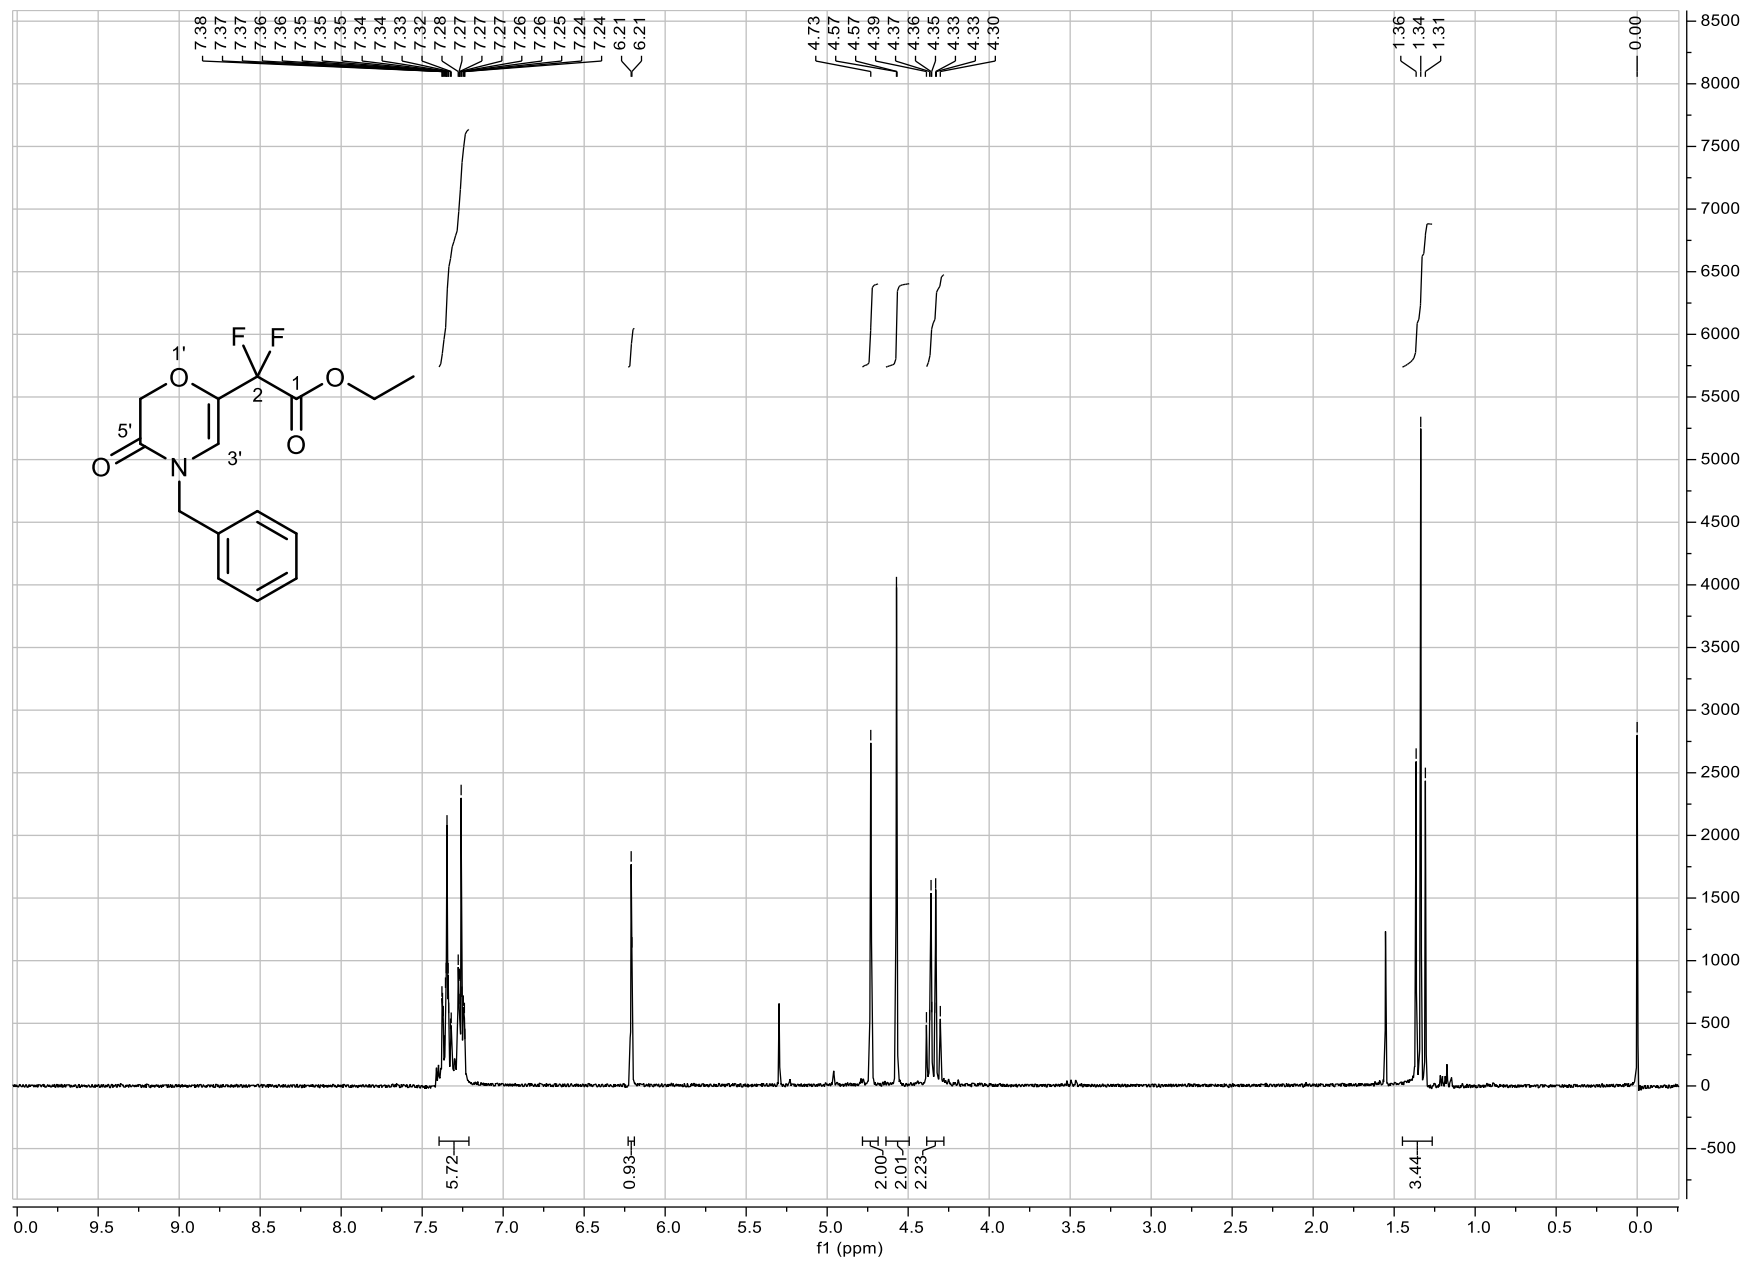

**$^{19}\text{F}$  NMR (235 MHz,  $\text{CDCl}_3$ ) Analysis of Compound 3d.**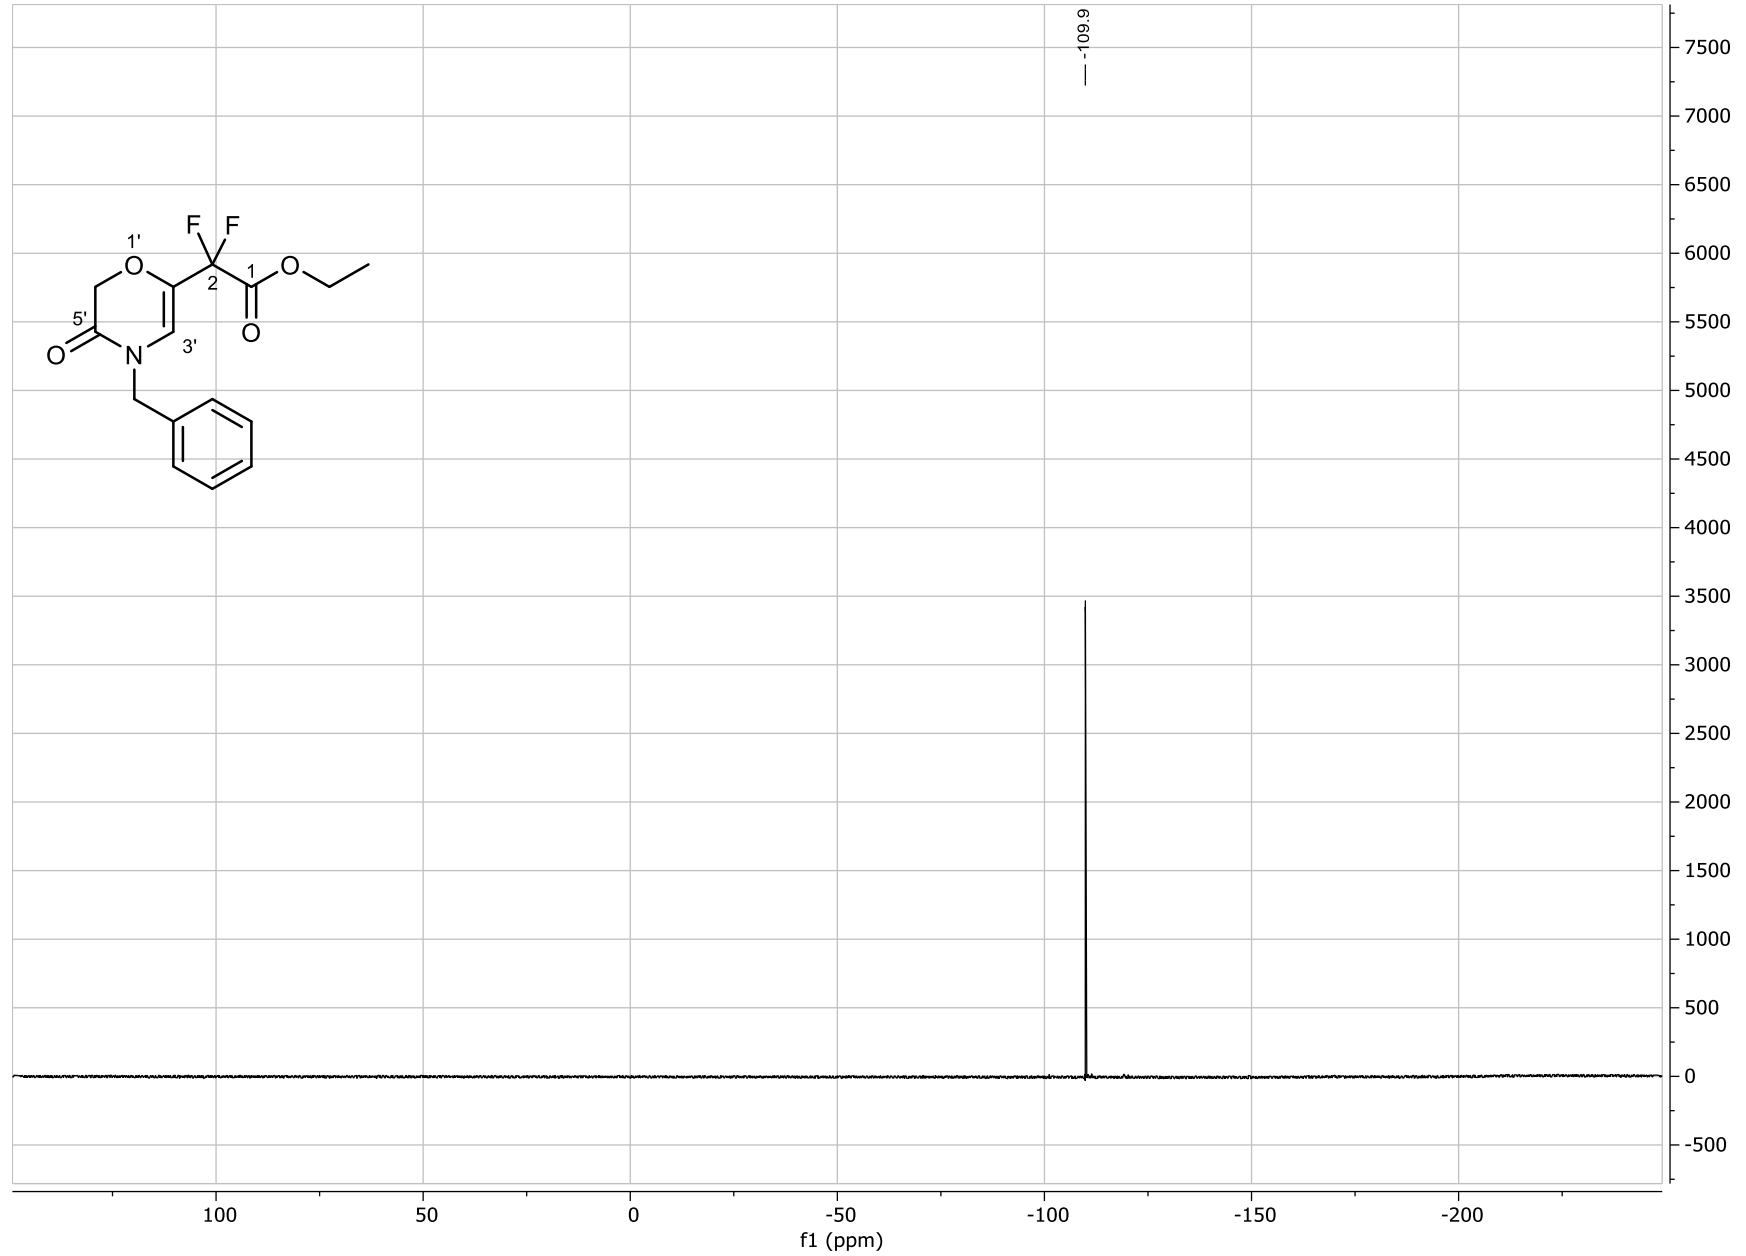

$^1\text{H}$  NMR (400 MHz,  $\text{CDCl}_3/\text{TMS}$ ) Spectrum of Compound 3e.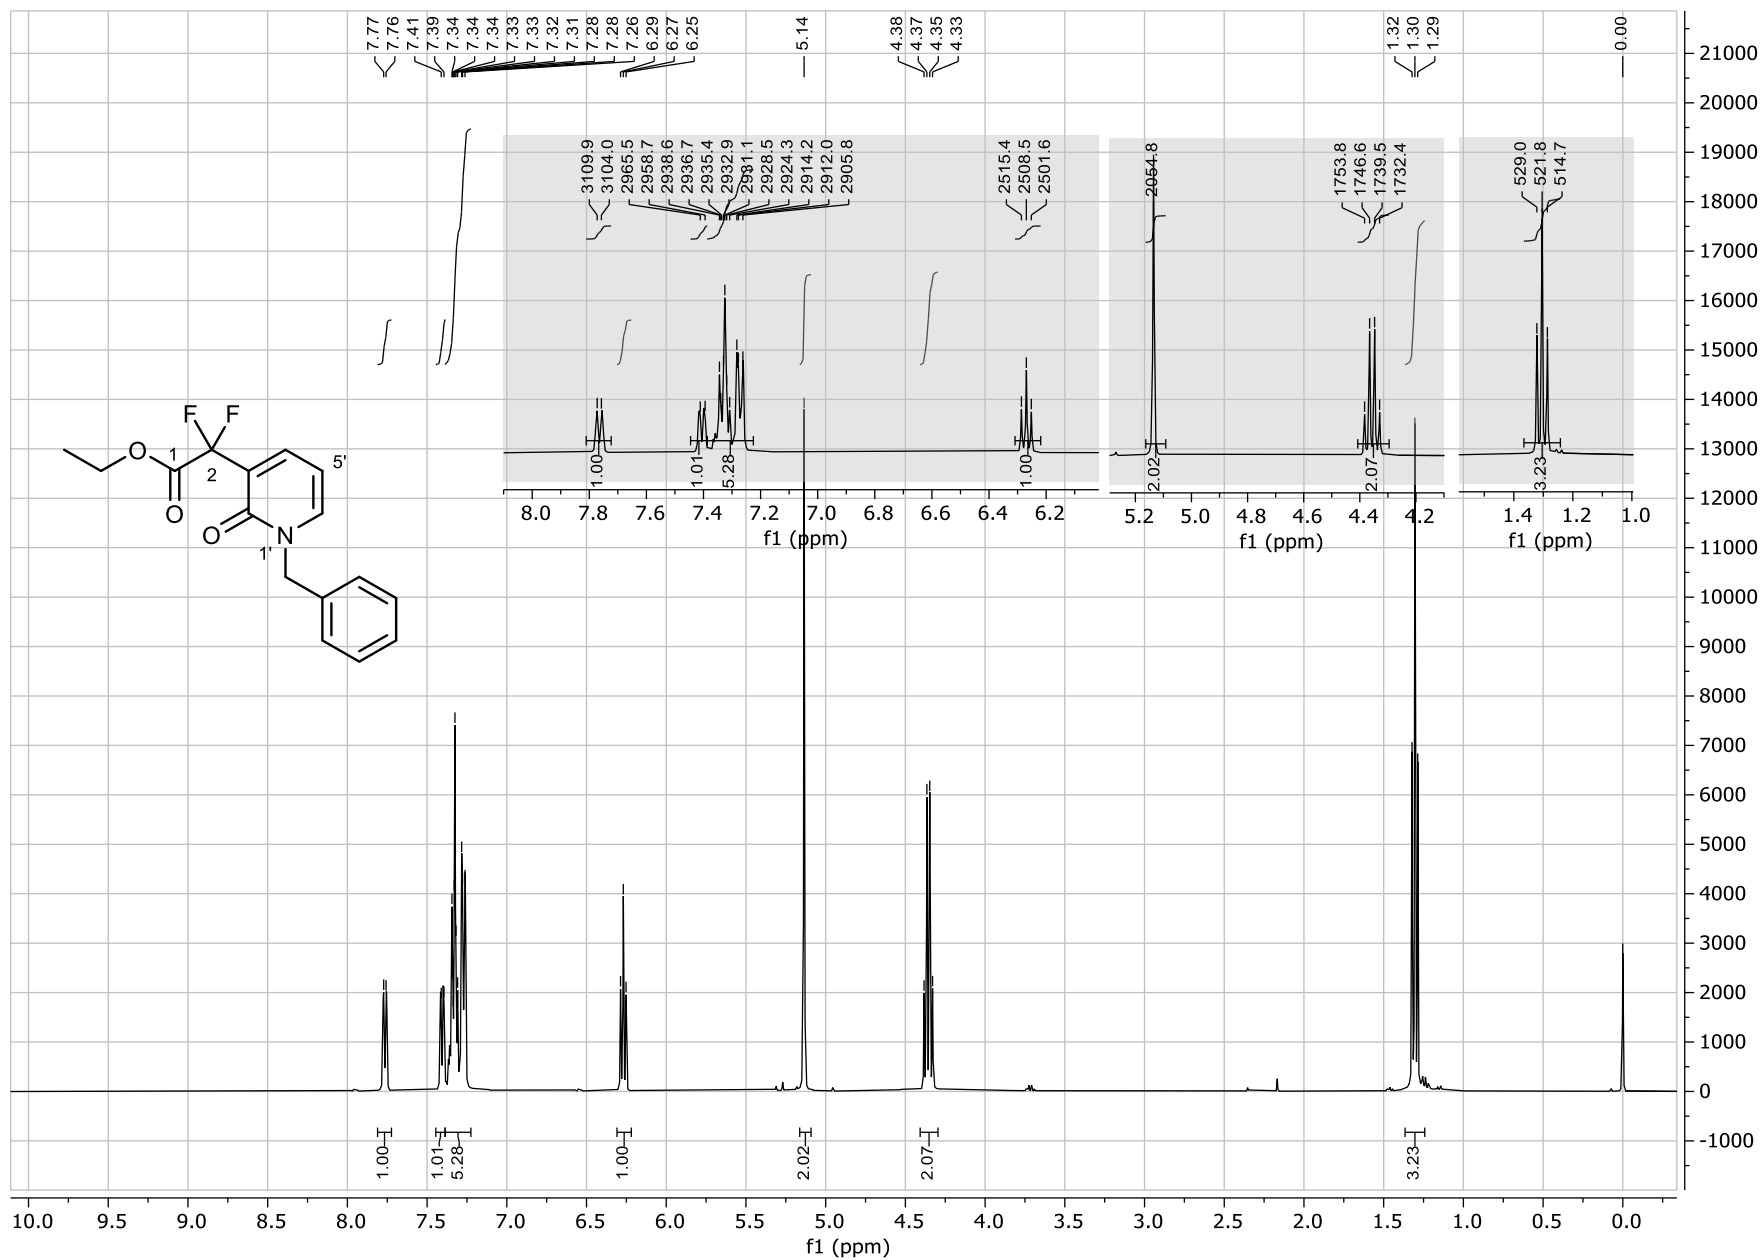

**$^{13}\text{C}$  NMR (101 MHz,  $\text{CDCl}_3$ ) Spectrum of Compound 3e.**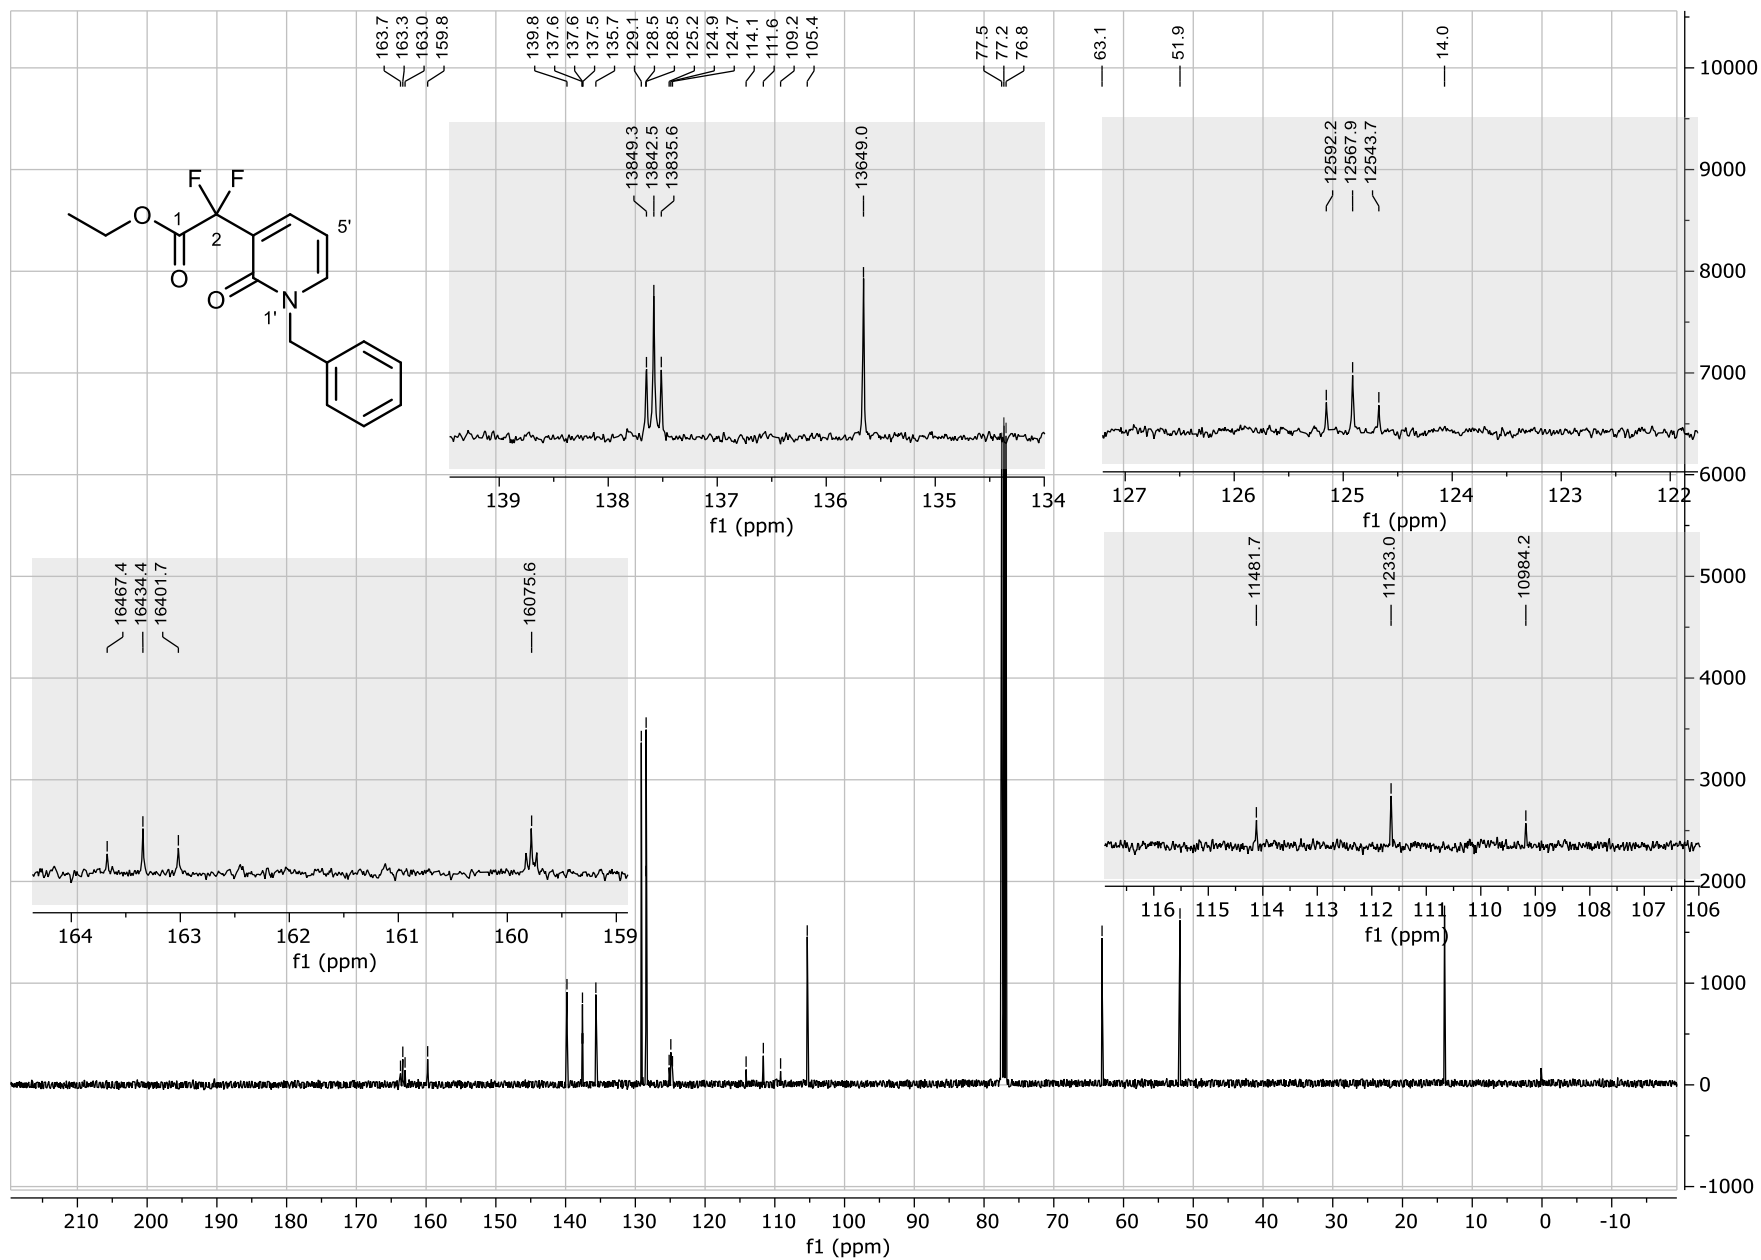

**$^{19}\text{F}$  NMR (376 MHz,  $\text{CDCl}_3$ ) Spectrum of Compound 3e.**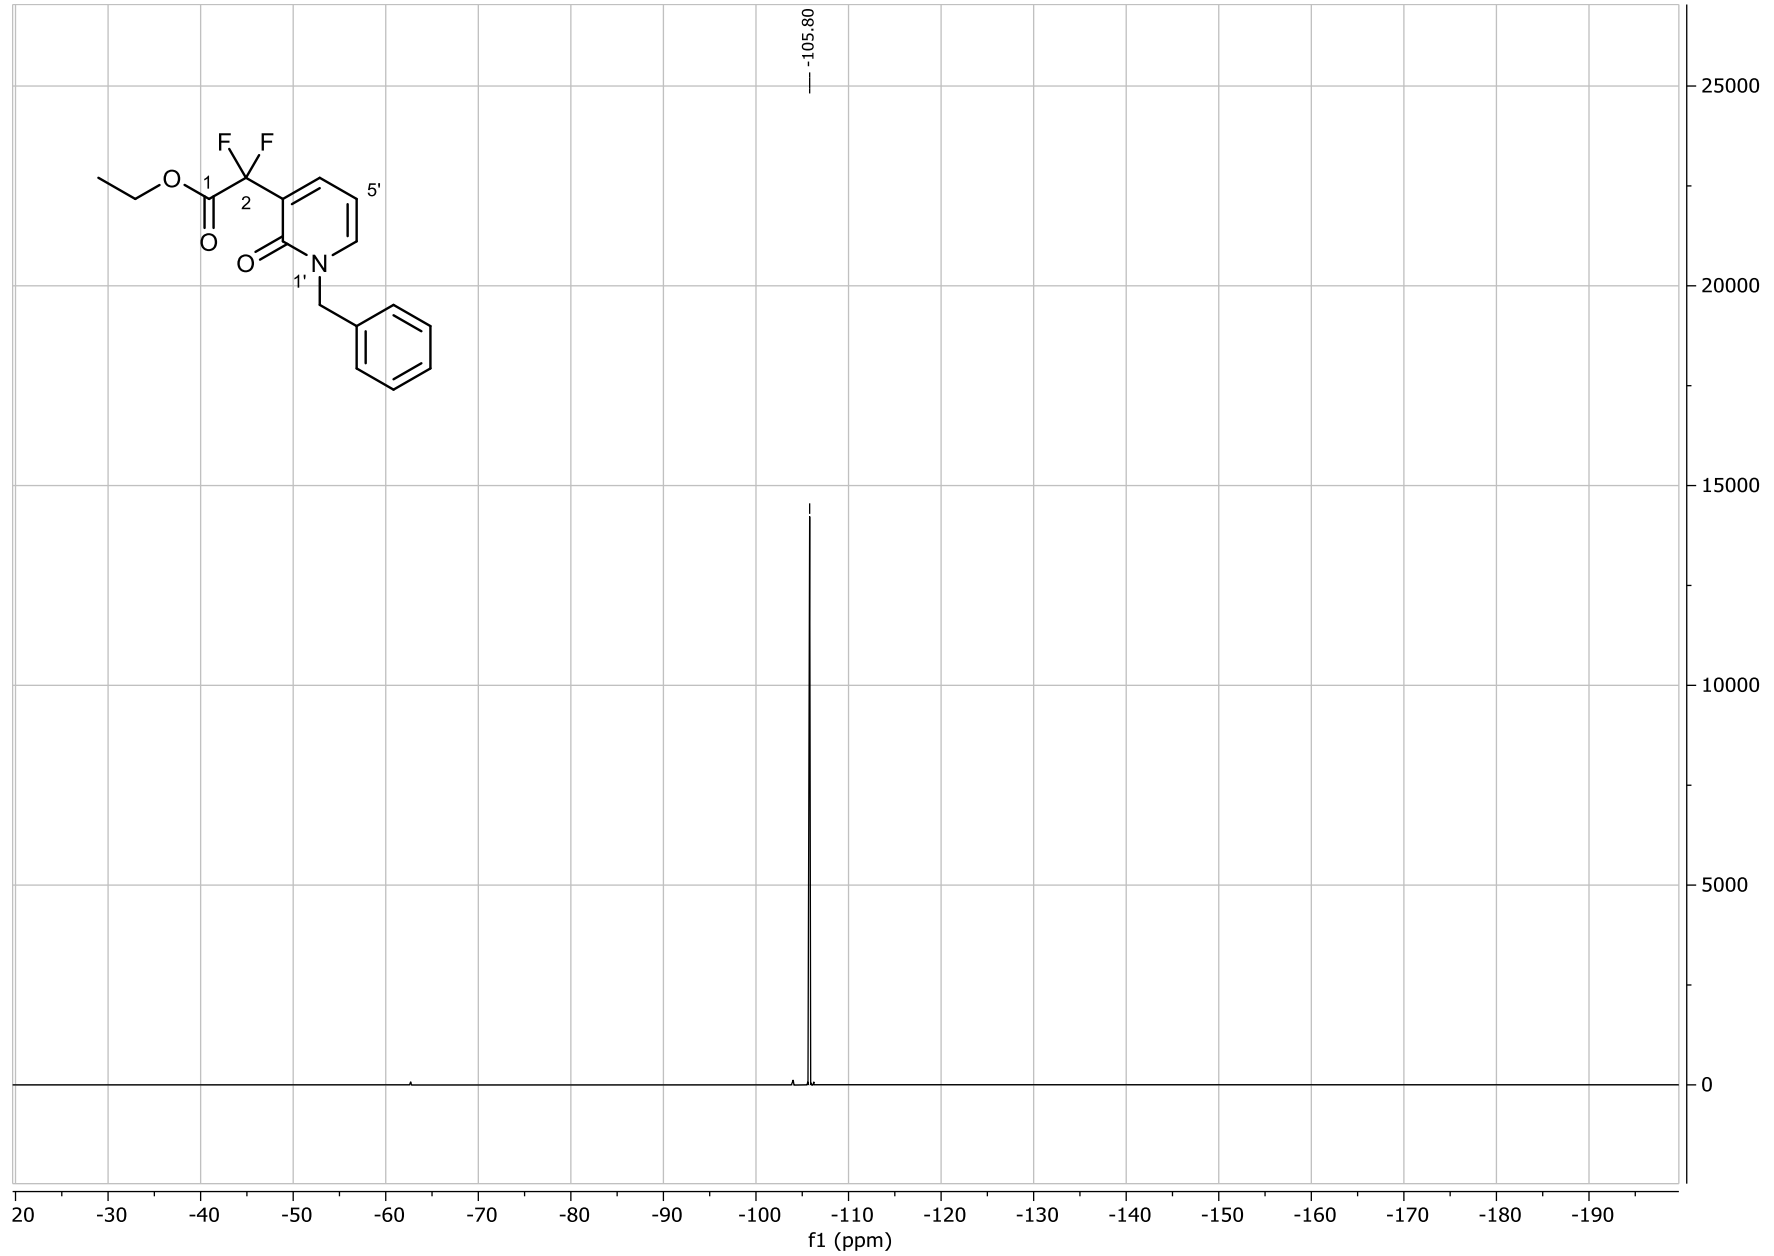

$^1\text{H}$  NMR (400 MHz,  $\text{CDCl}_3/\text{TMS}$ ) Spectrum of Compound 3f.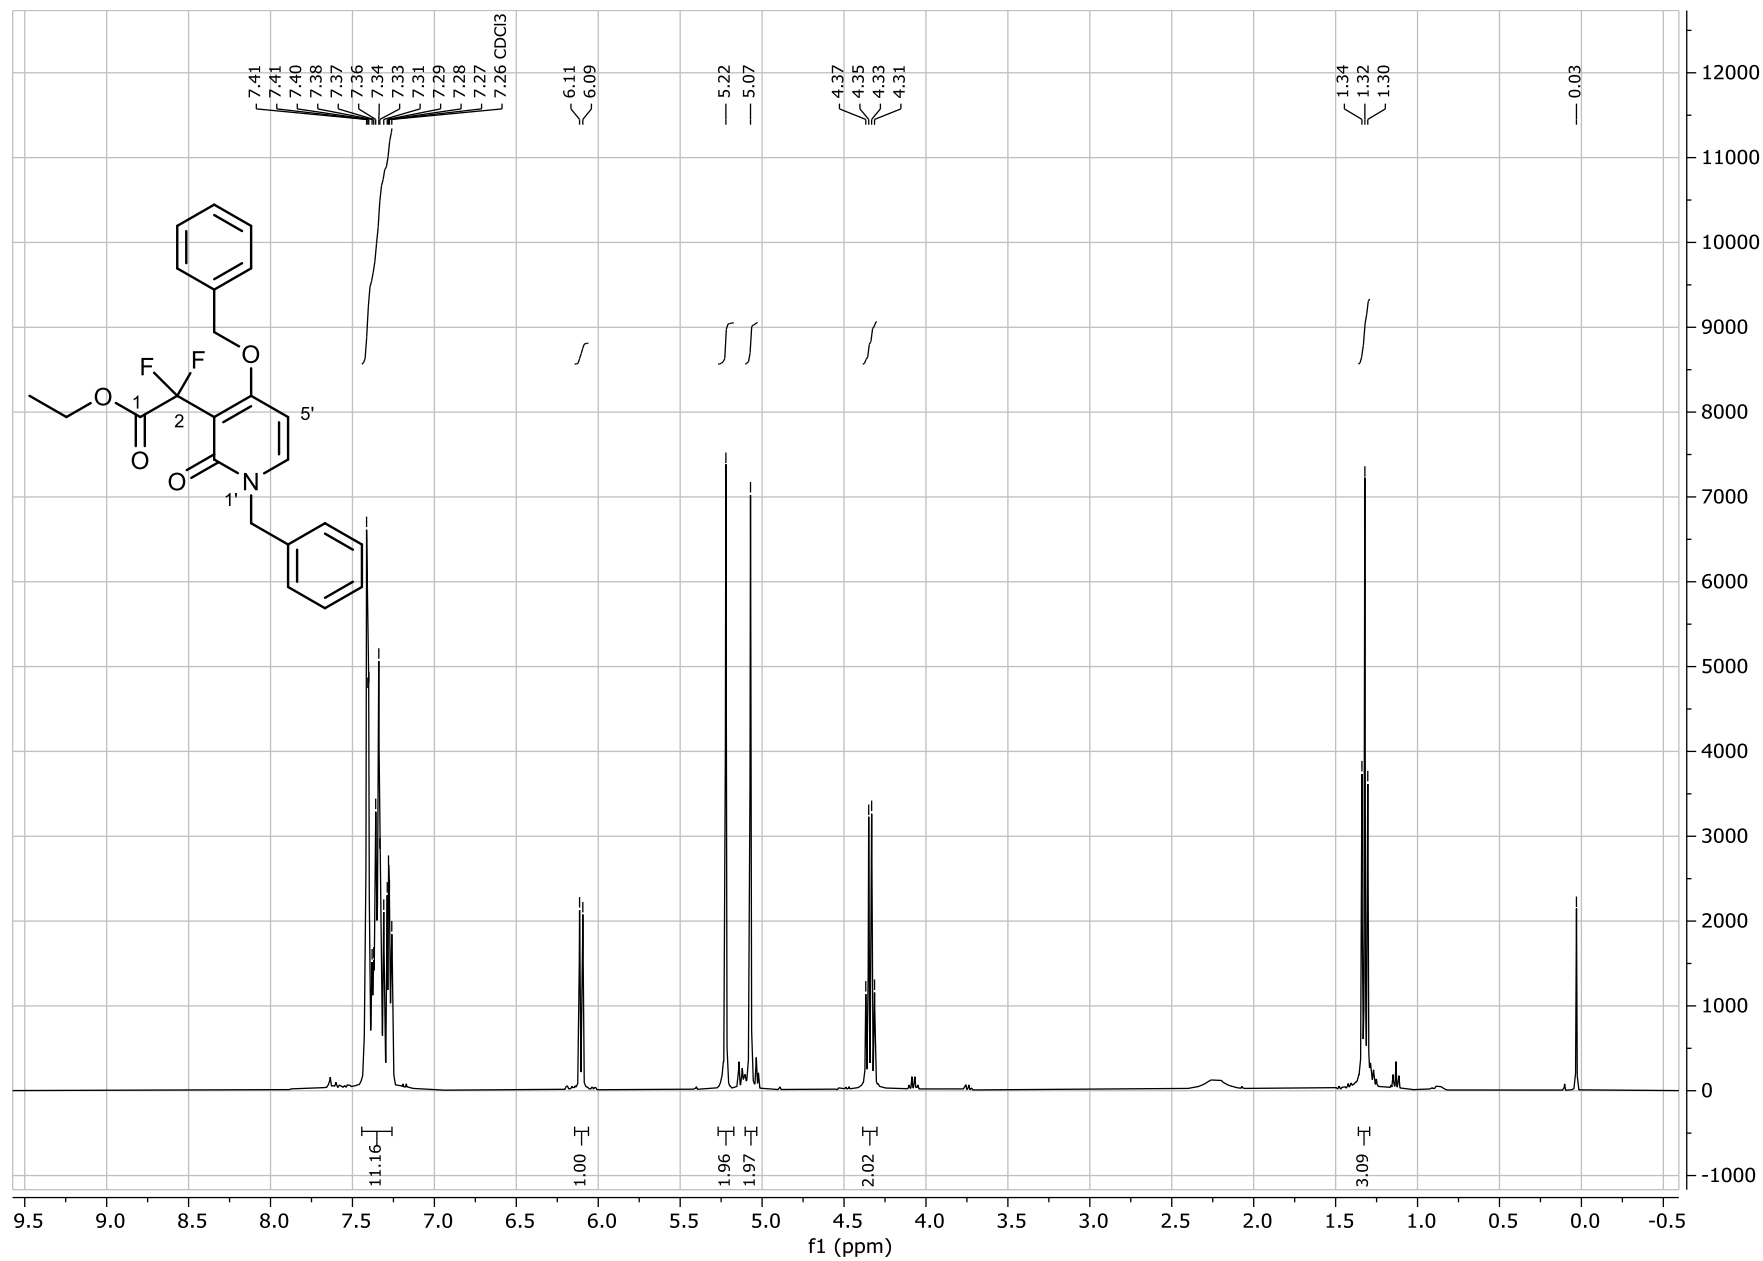

**$^{13}\text{C}$  NMR (101 MHz,  $\text{CDCl}_3$ ) Spectrum of Compound 3f.**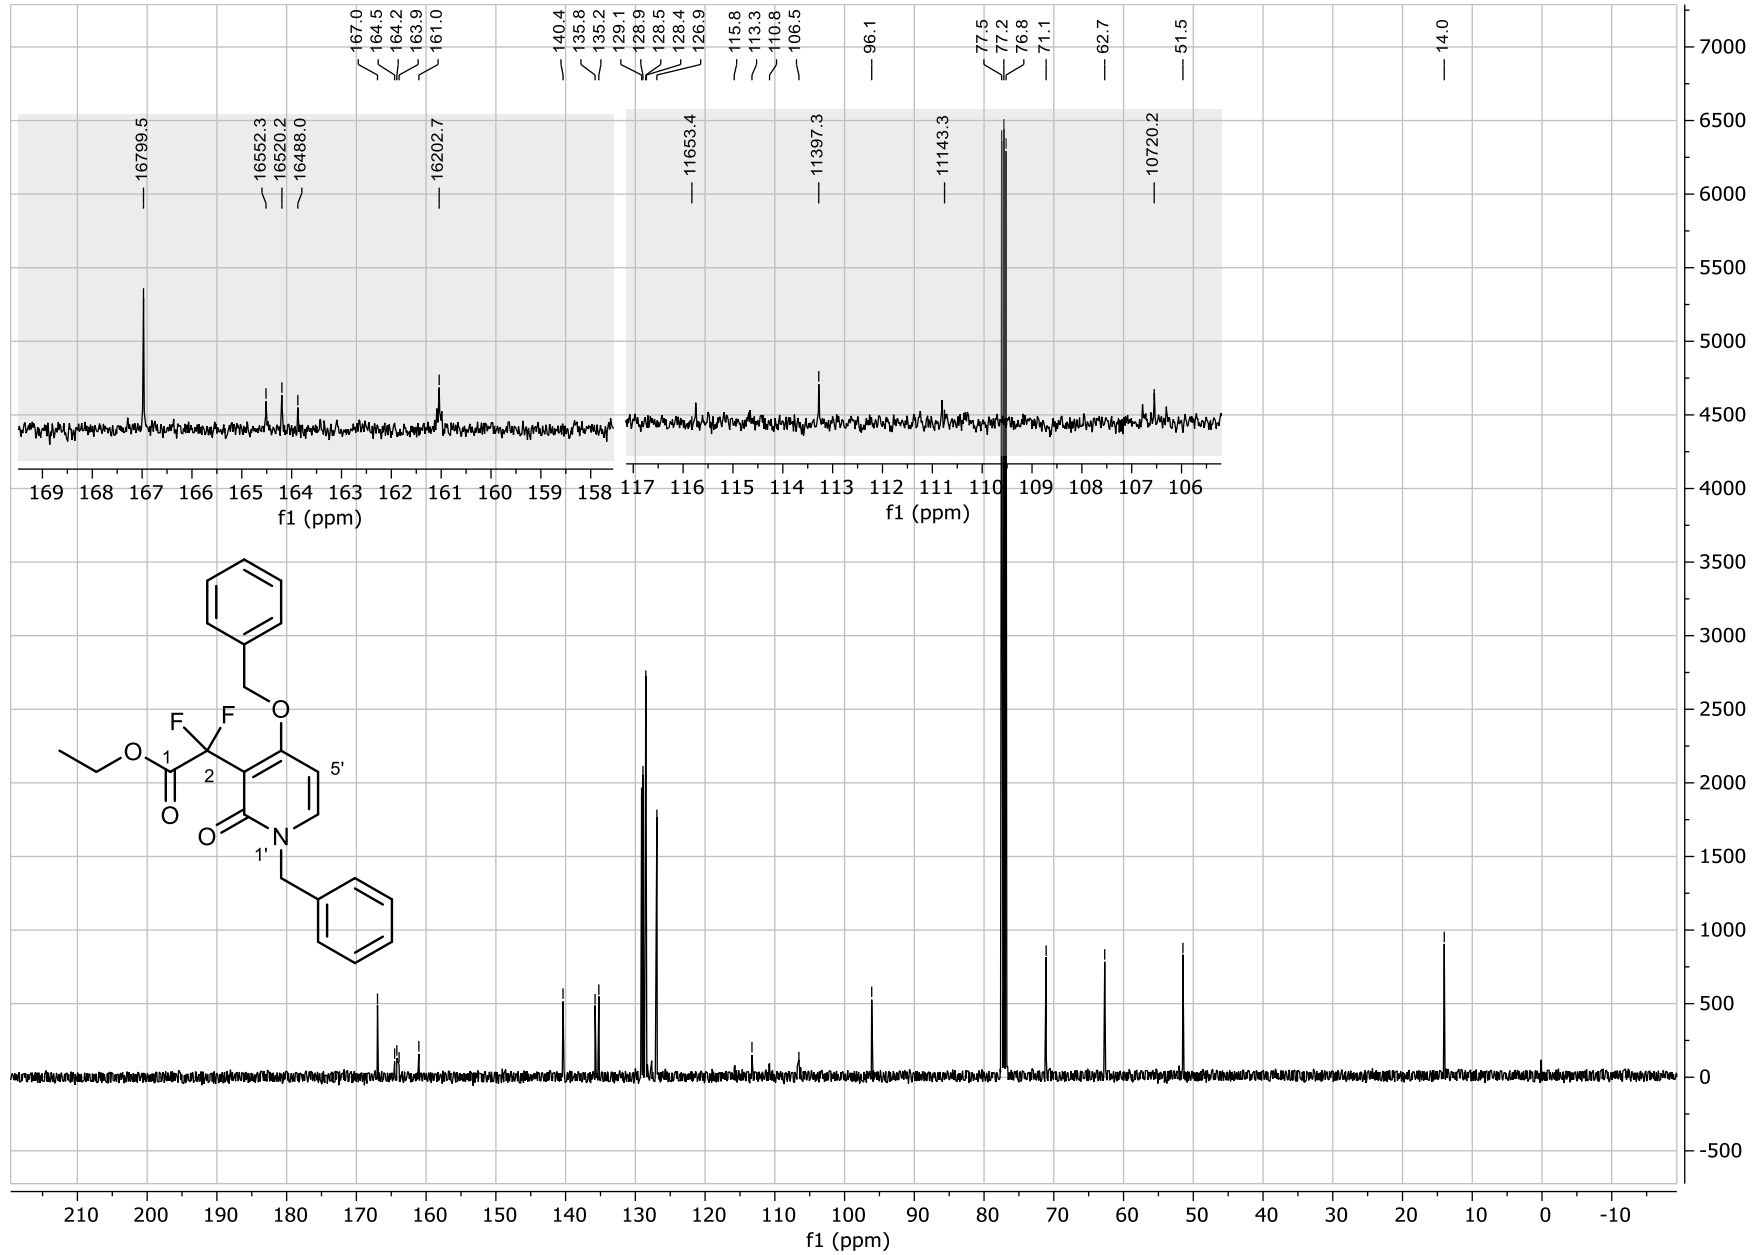



HMBC NMR (400,101 MHz, CDCl<sub>3</sub>) Spectrum of Compound 3f.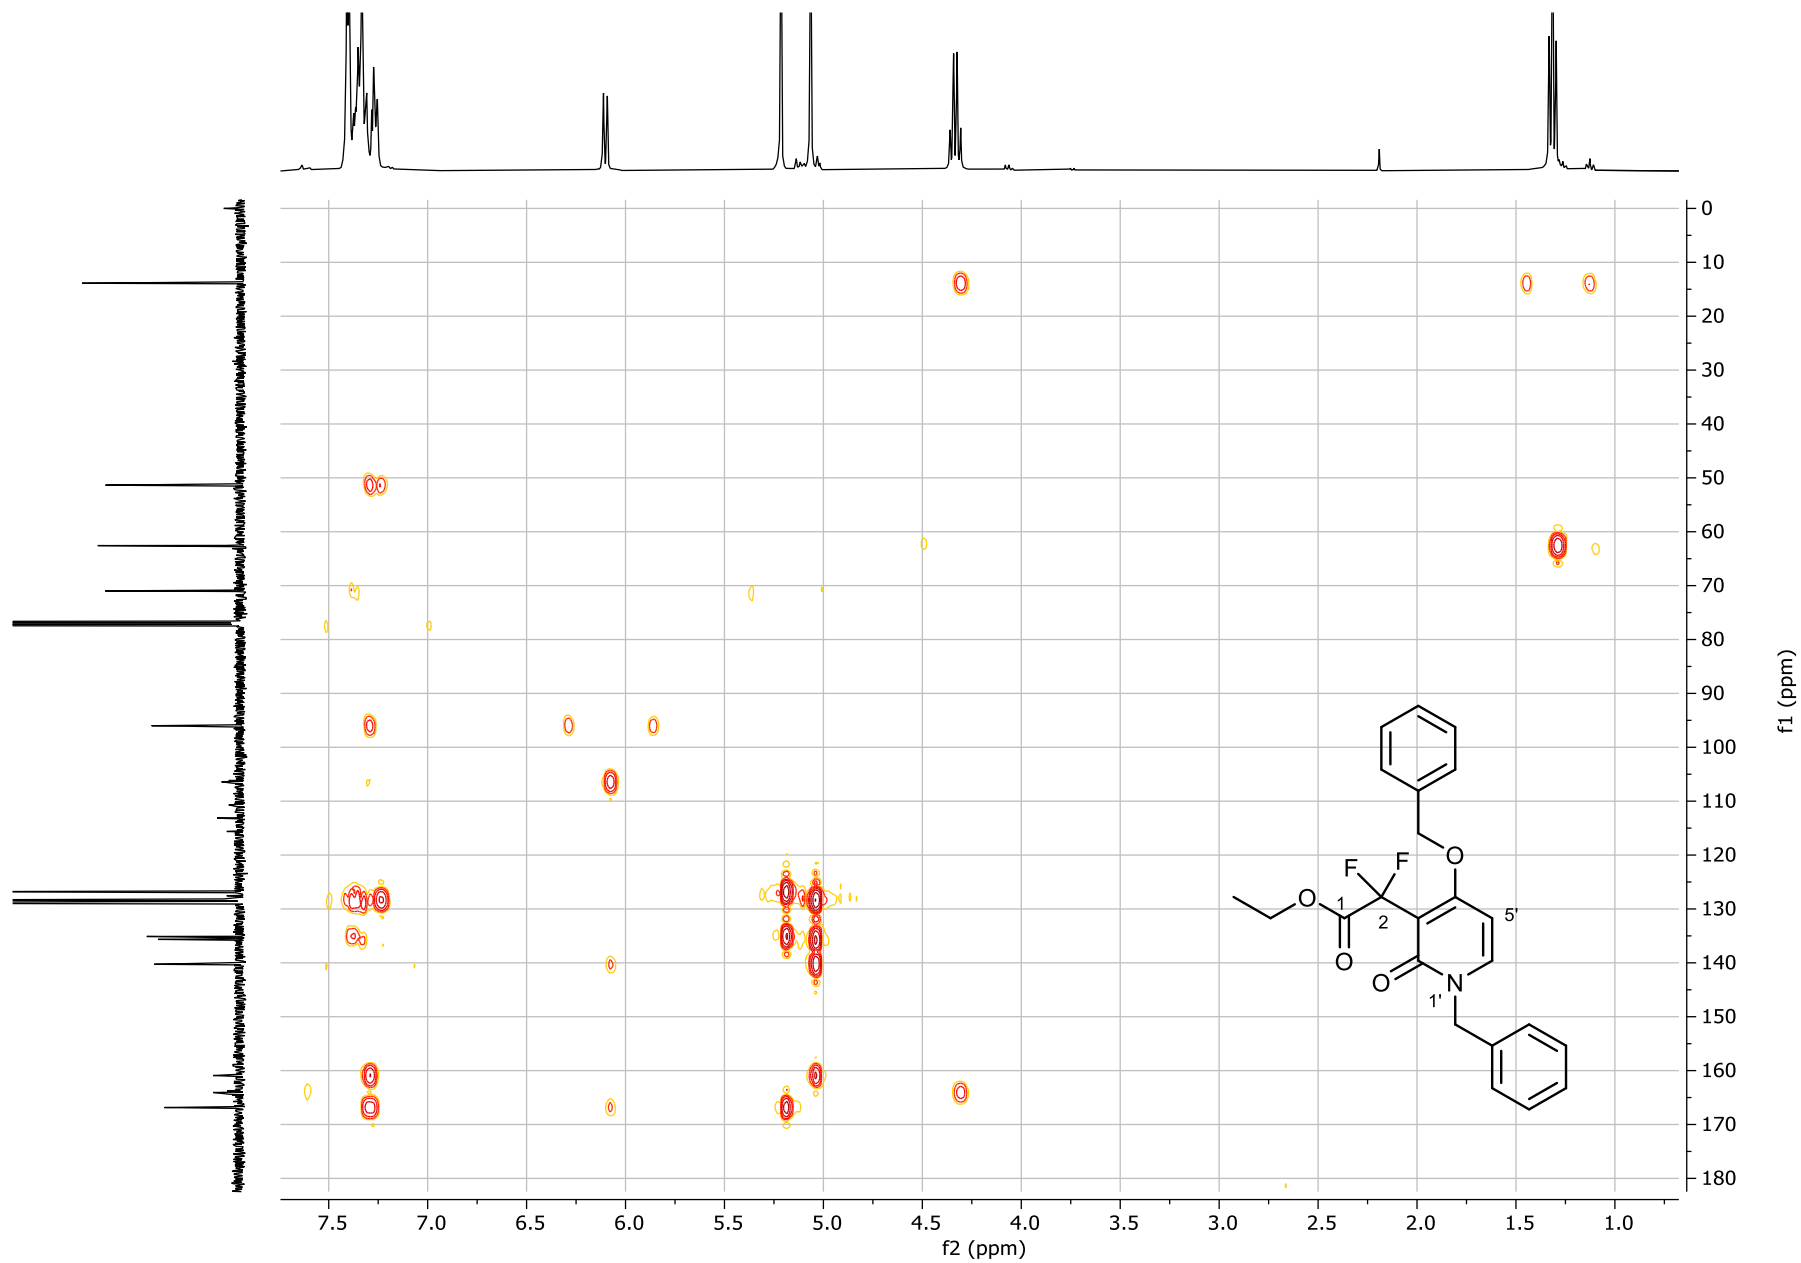

**$^{19}\text{F}$  NMR (376 MHz,  $\text{CDCl}_3$ ) Spectrum of Compound 3f.**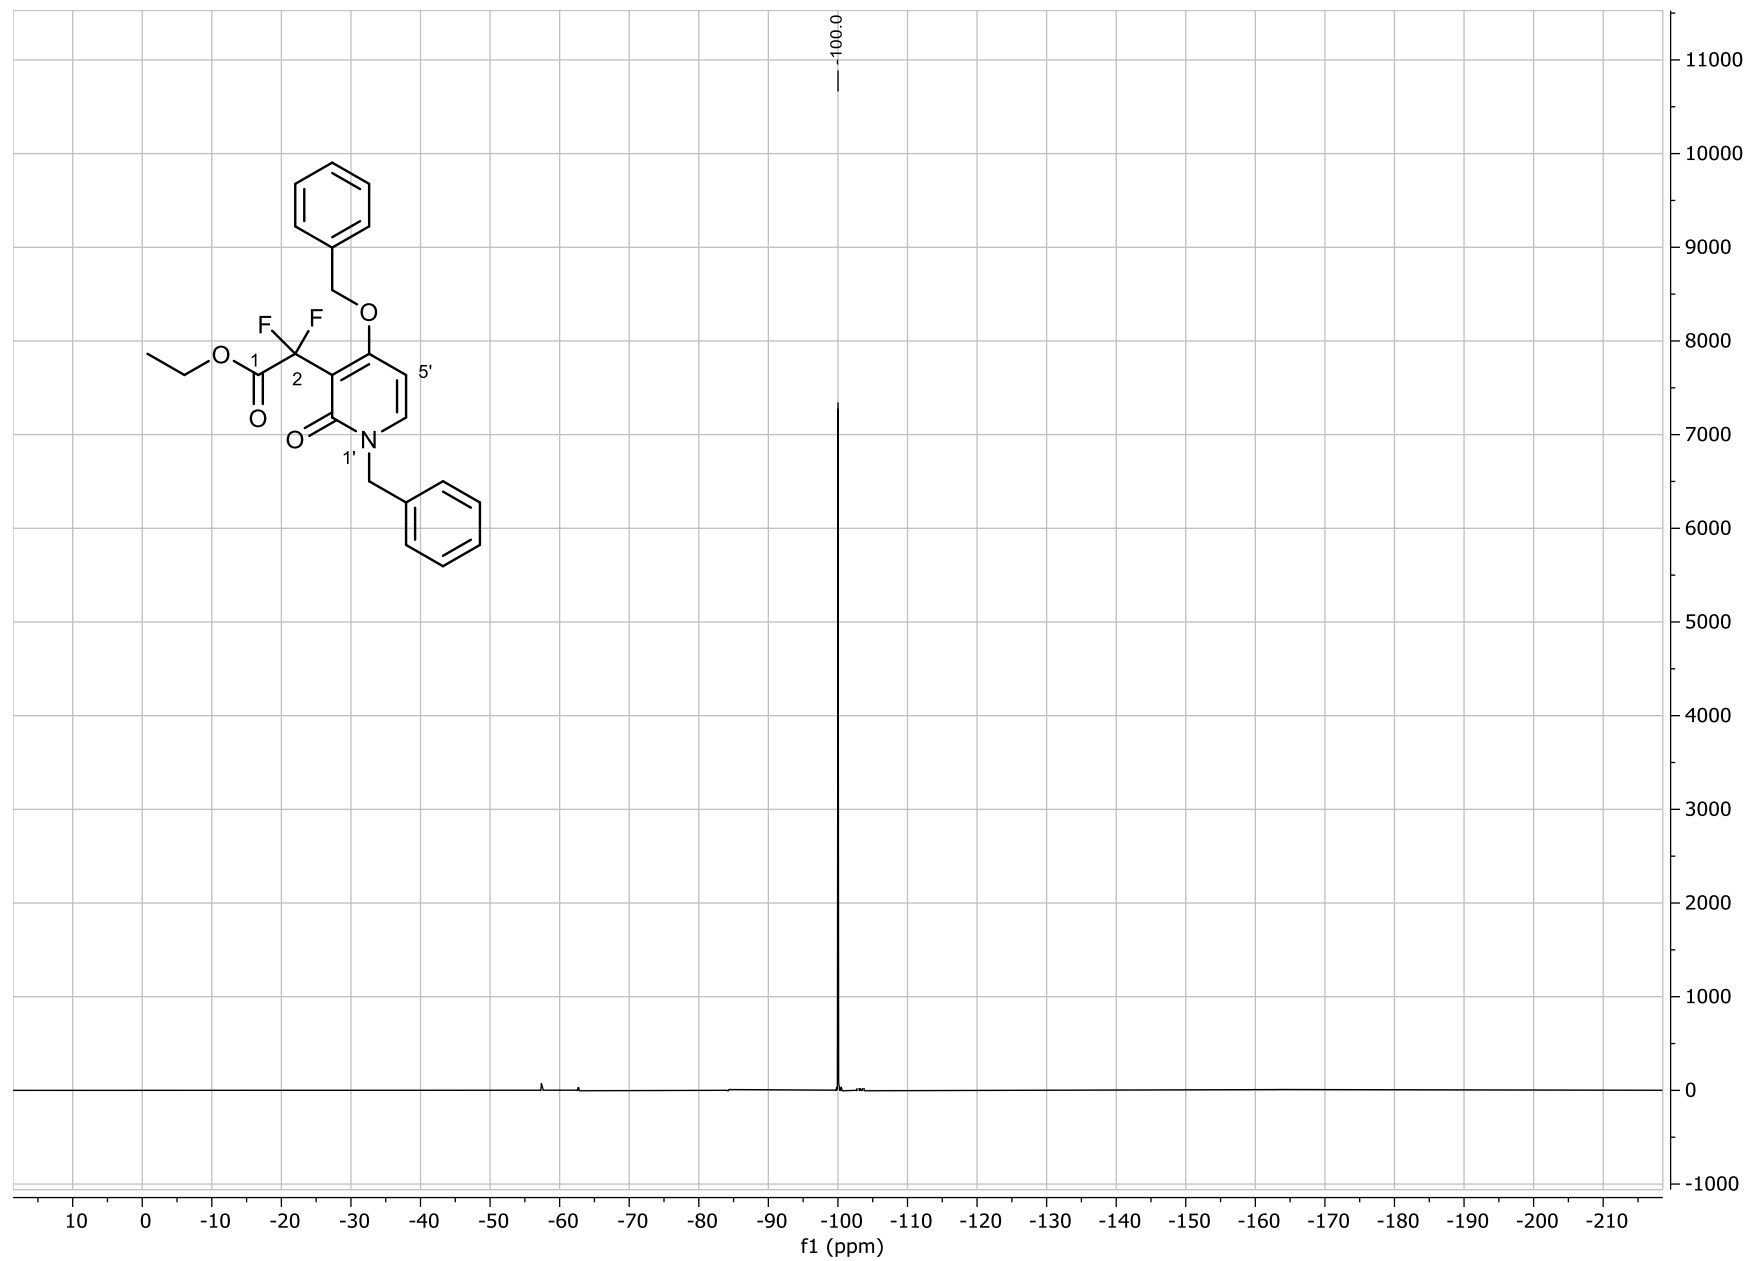

$^1\text{H}$  NMR (400 MHz,  $\text{CDCl}_3$ ) Spectrum of Compound 3g.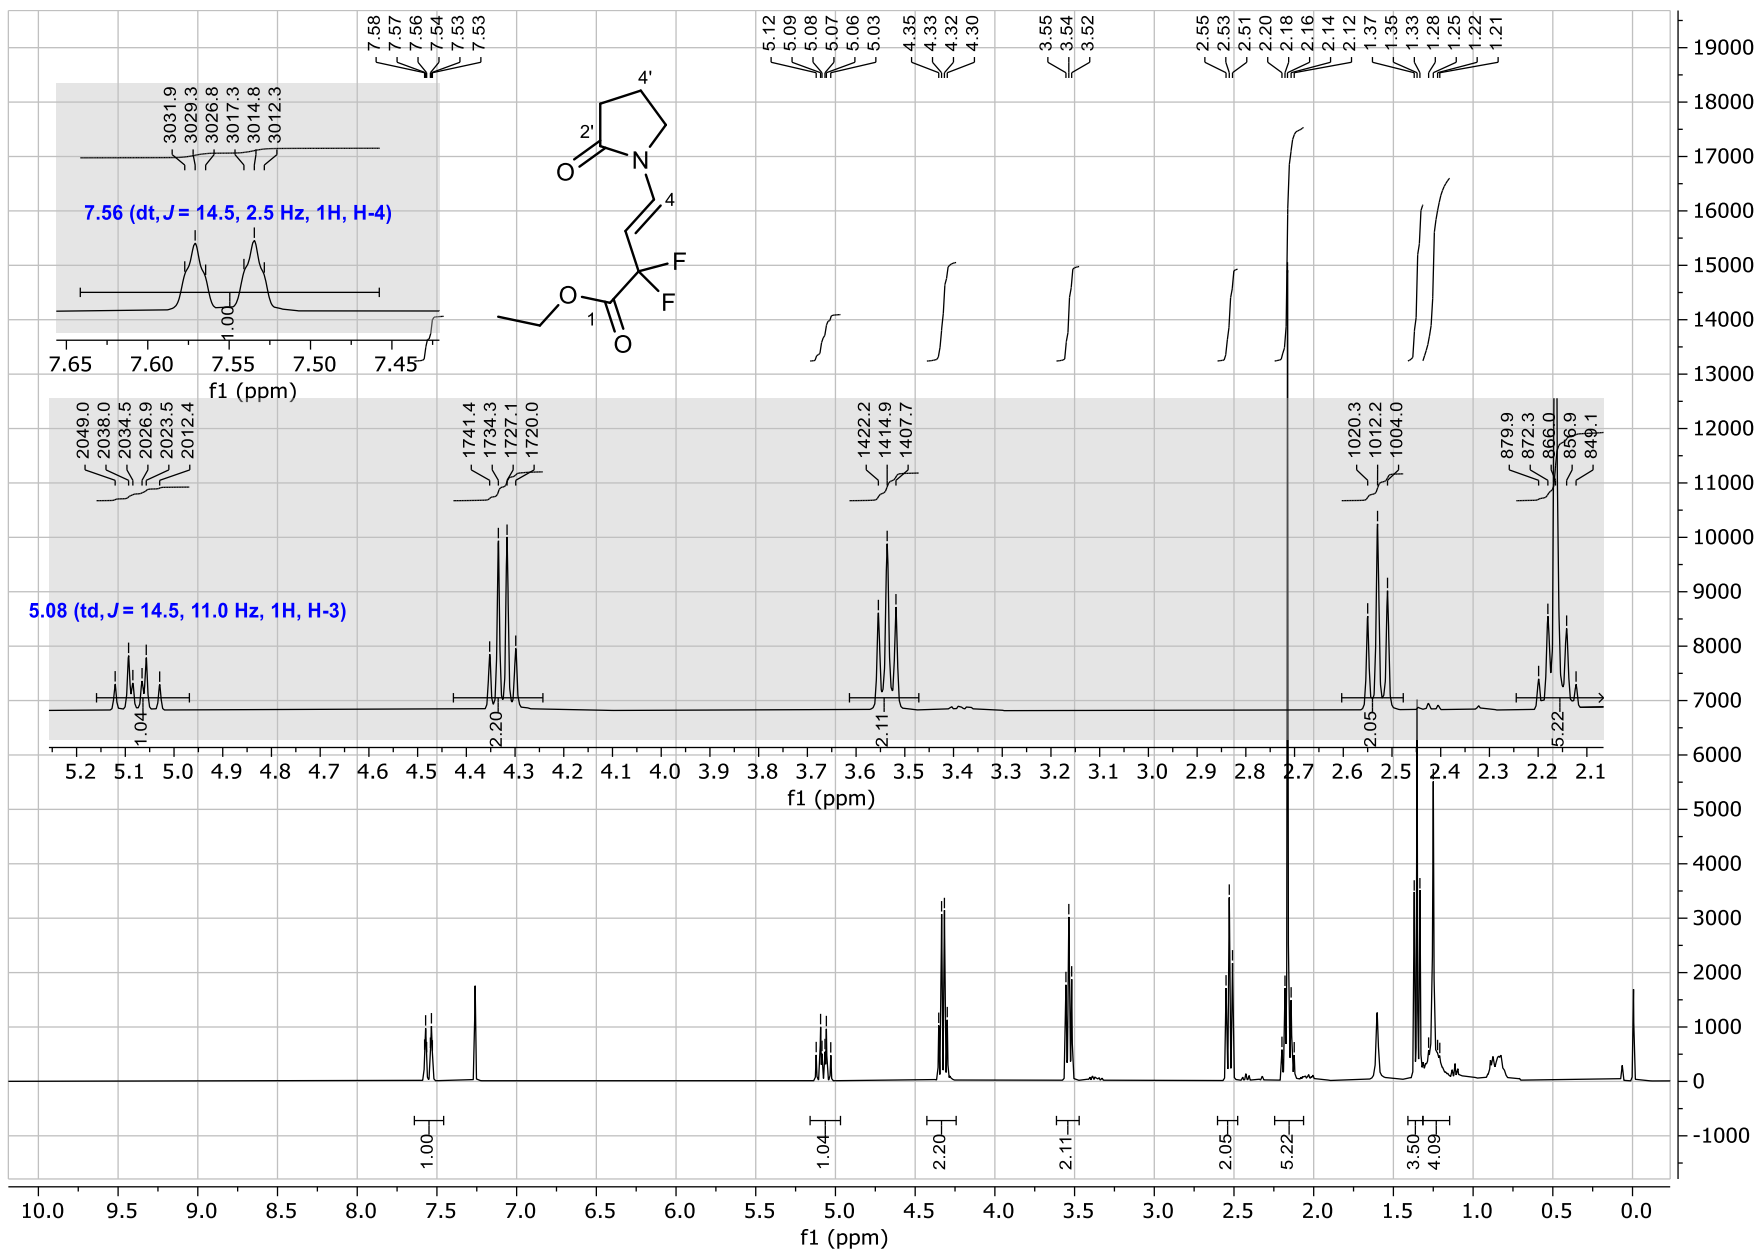

**$^{13}\text{C}$  NMR (101 MHz,  $\text{CDCl}_3$ ) Spectrum of Compound 3g.**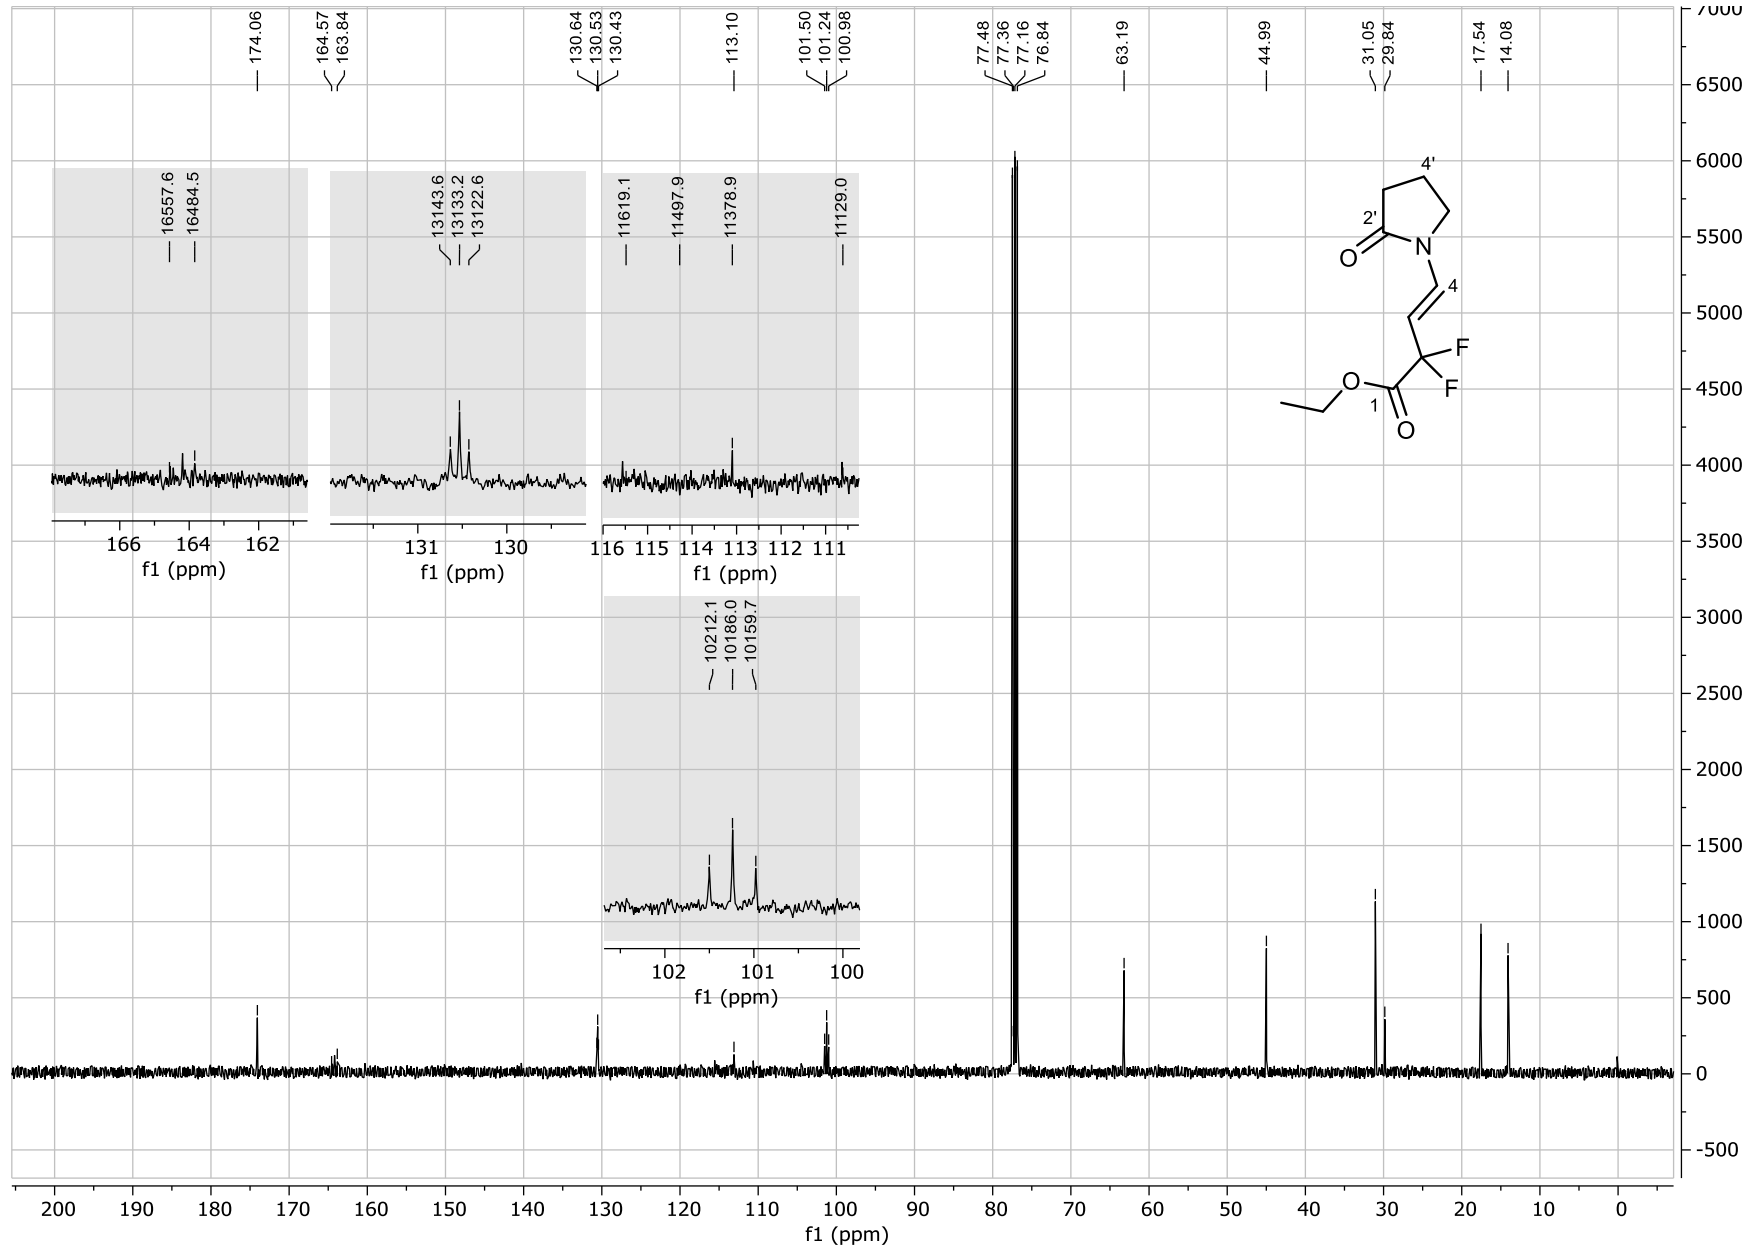

**$^{19}\text{F}$  NMR (376 MHz,  $\text{CDCl}_3$ ) Spectrum of Compound 3g.**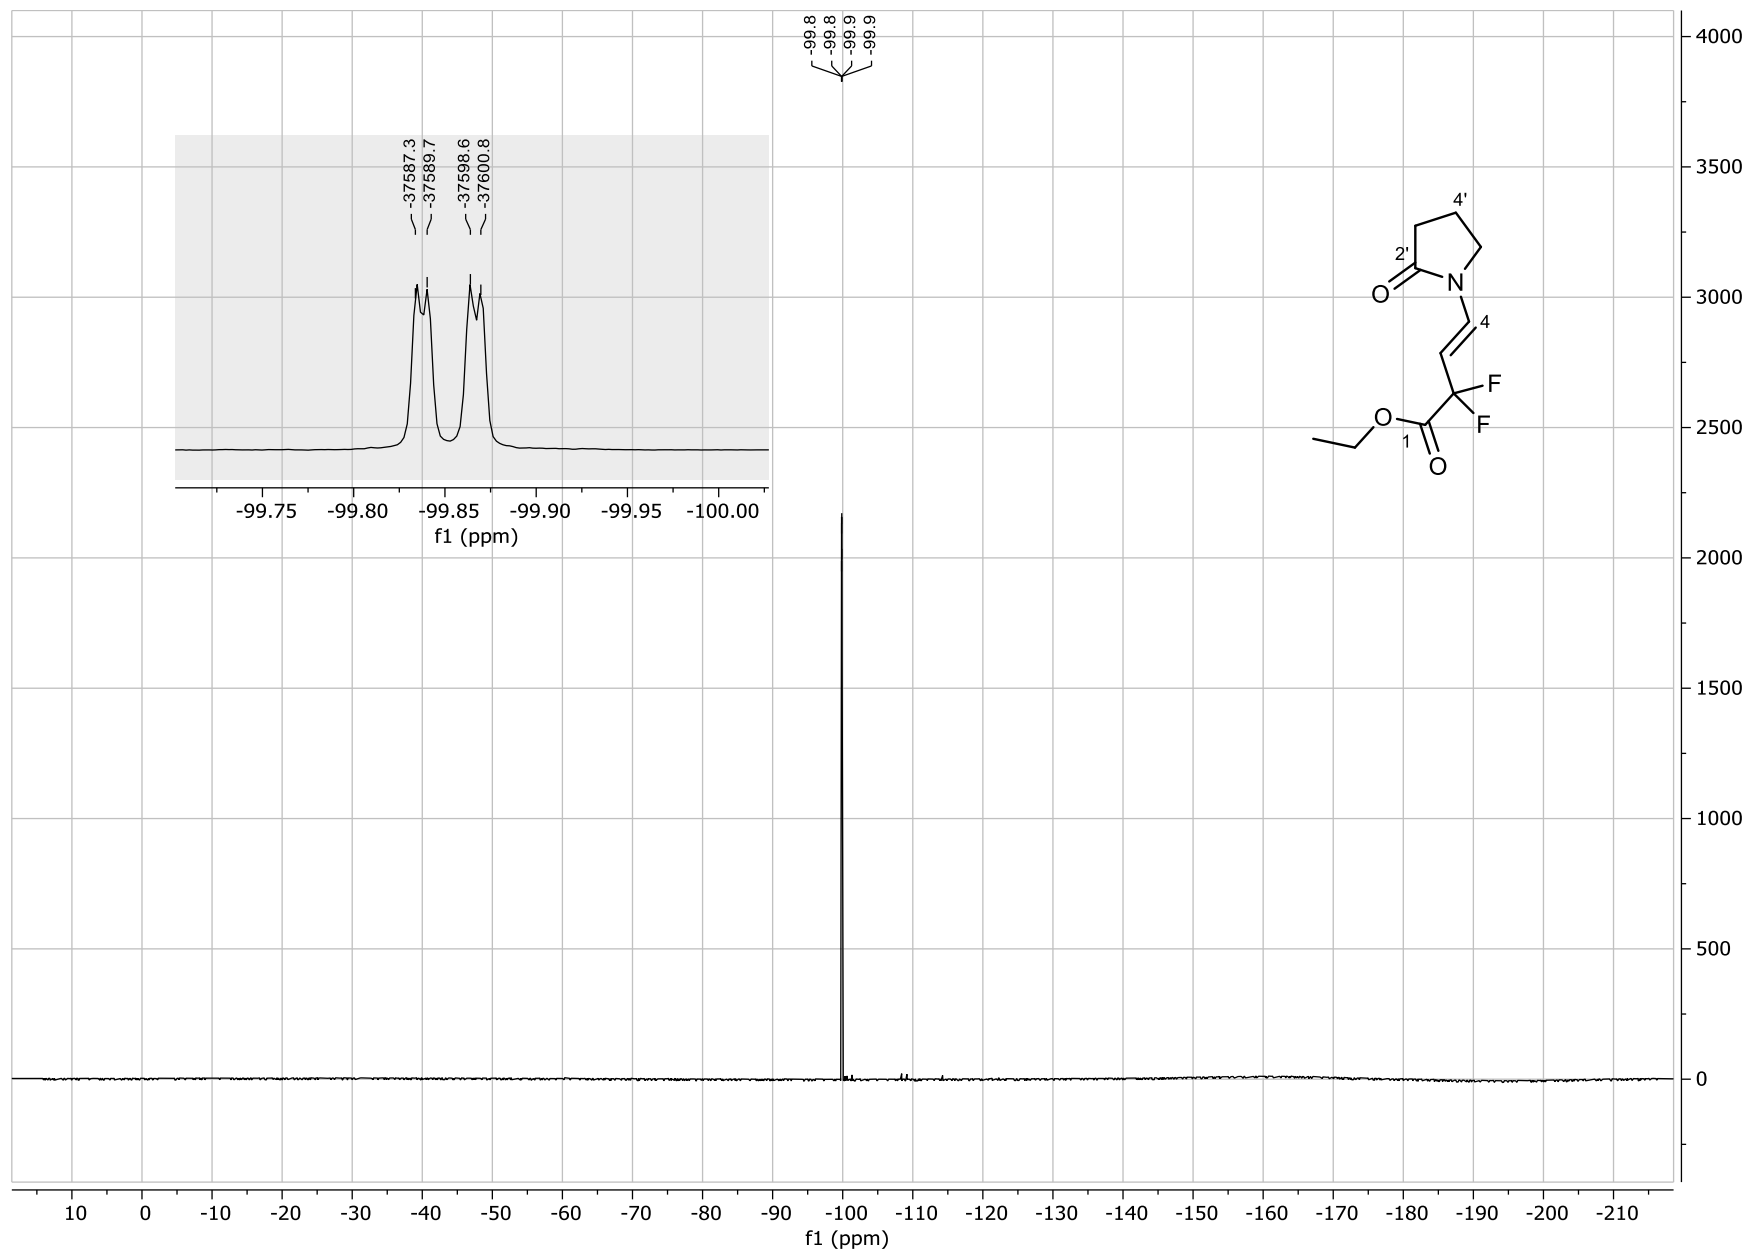

<sup>1</sup>H NMR (250 MHz/TMS, CDCl<sub>3</sub>) Spectrum of Compound 3h.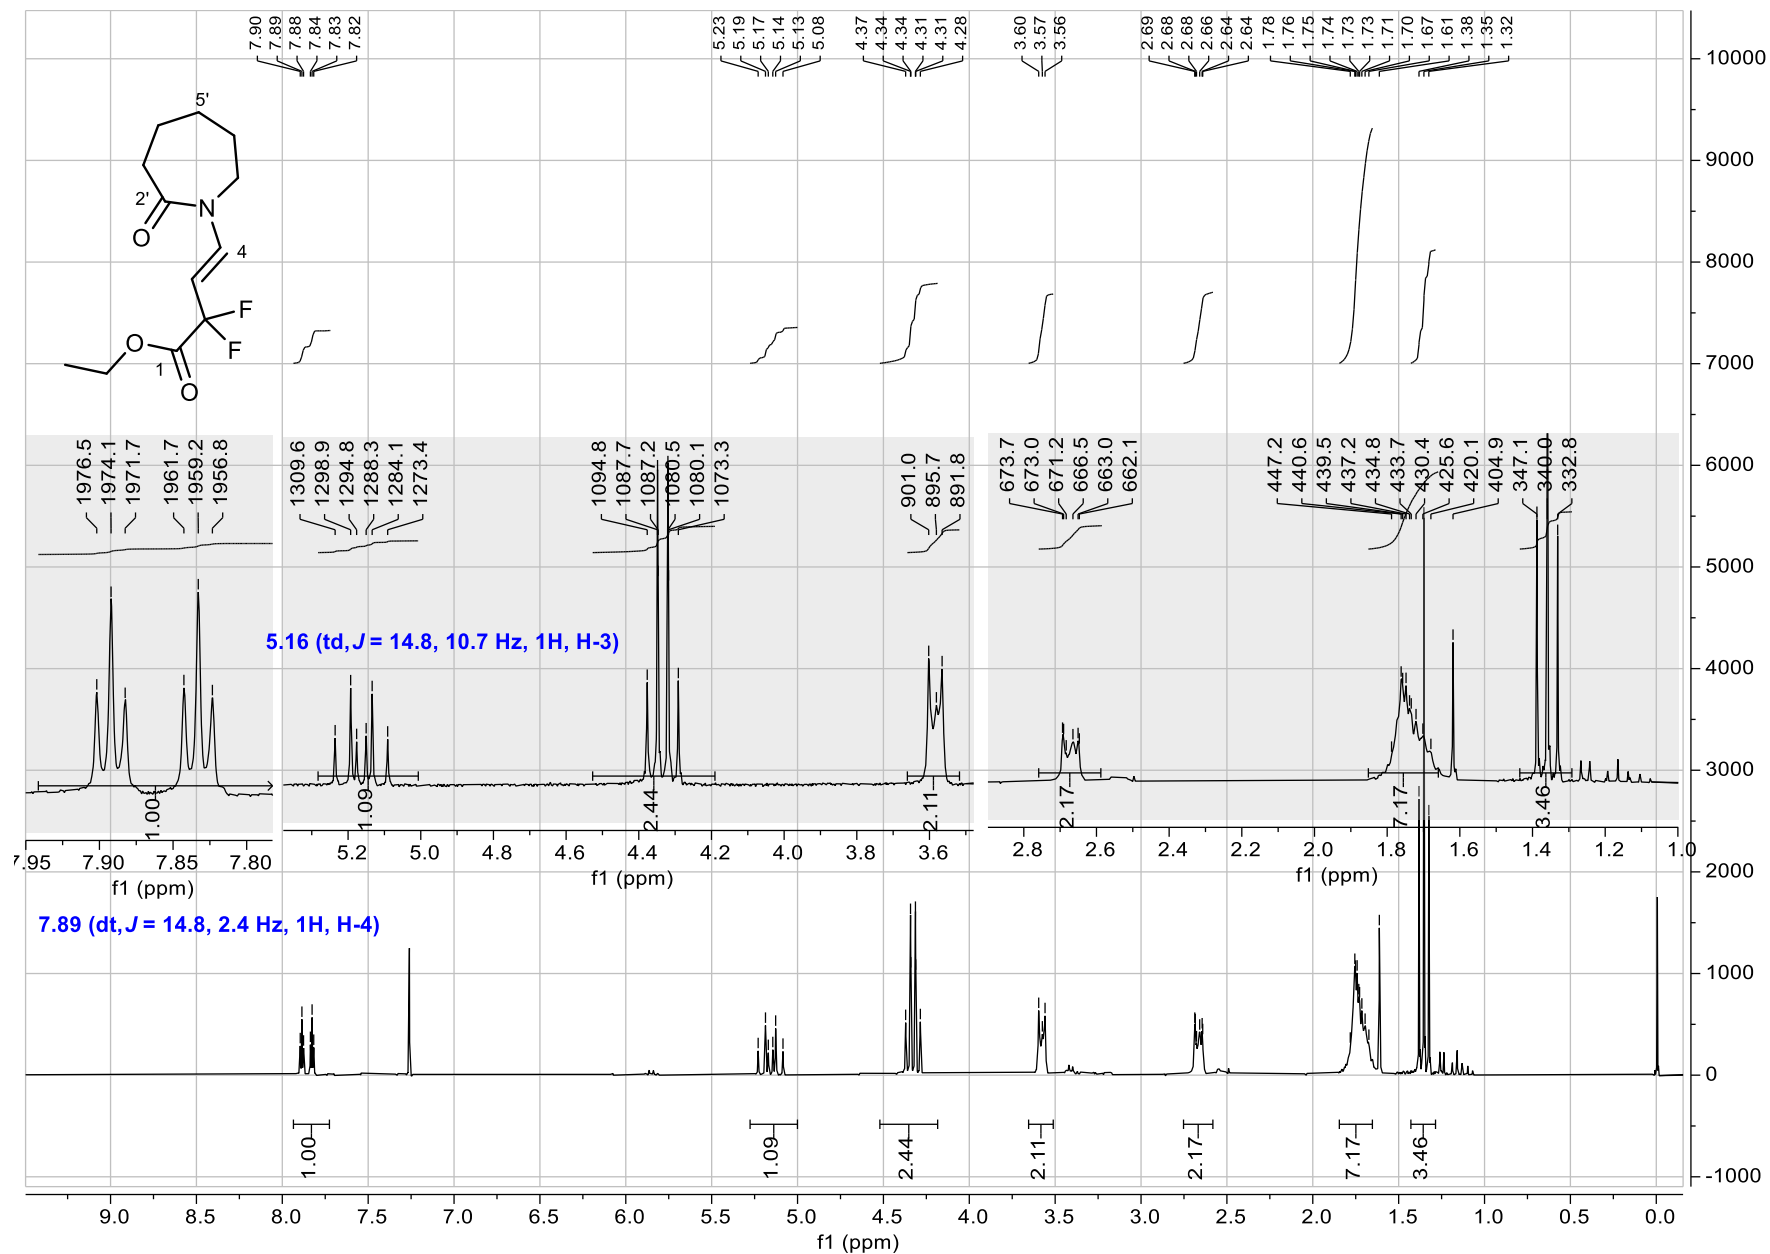

$^{13}\text{C}$  NMR (101 MHz,  $\text{CDCl}_3$ ) Spectrum of Compound 3h.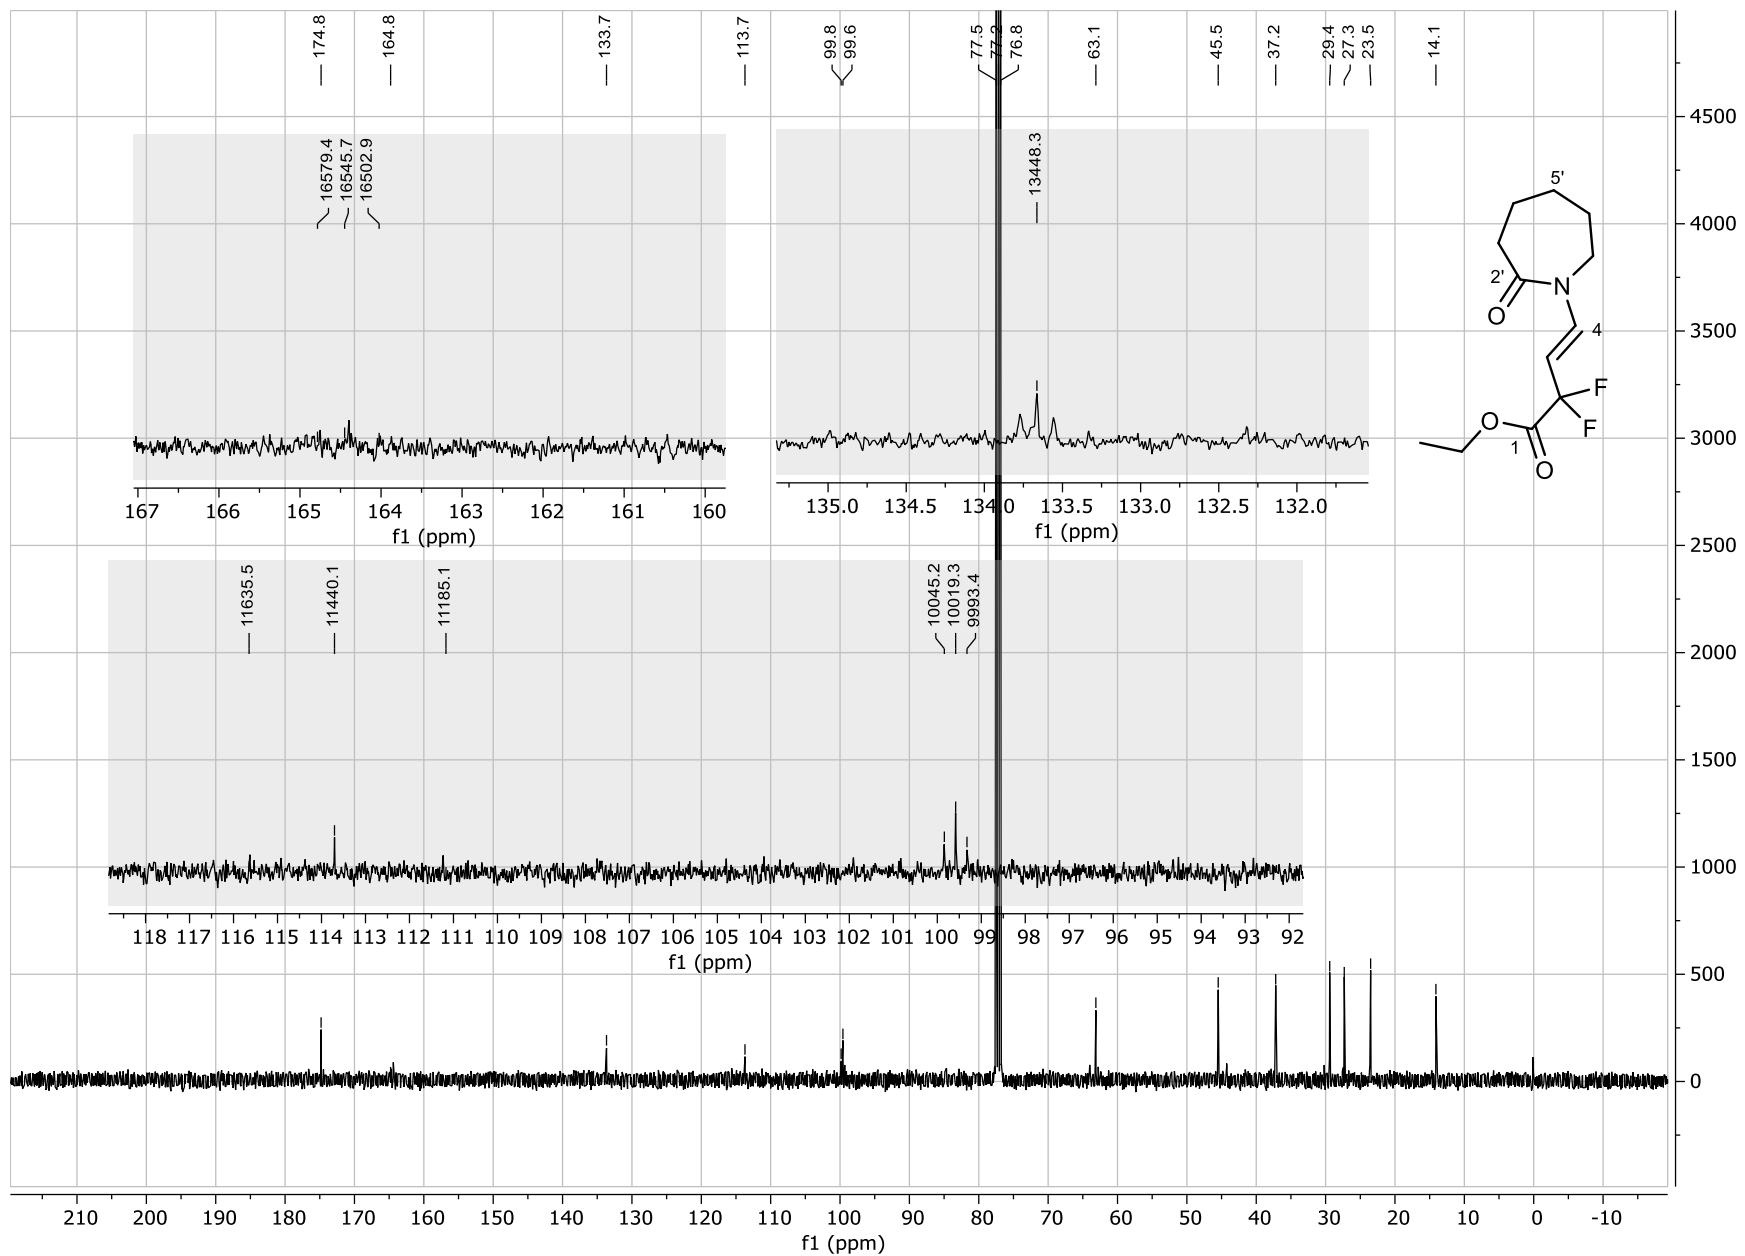

**$^{19}\text{F}$  NMR (235 MHz,  $\text{CDCl}_3$ ) Analysis of Compound 3h.**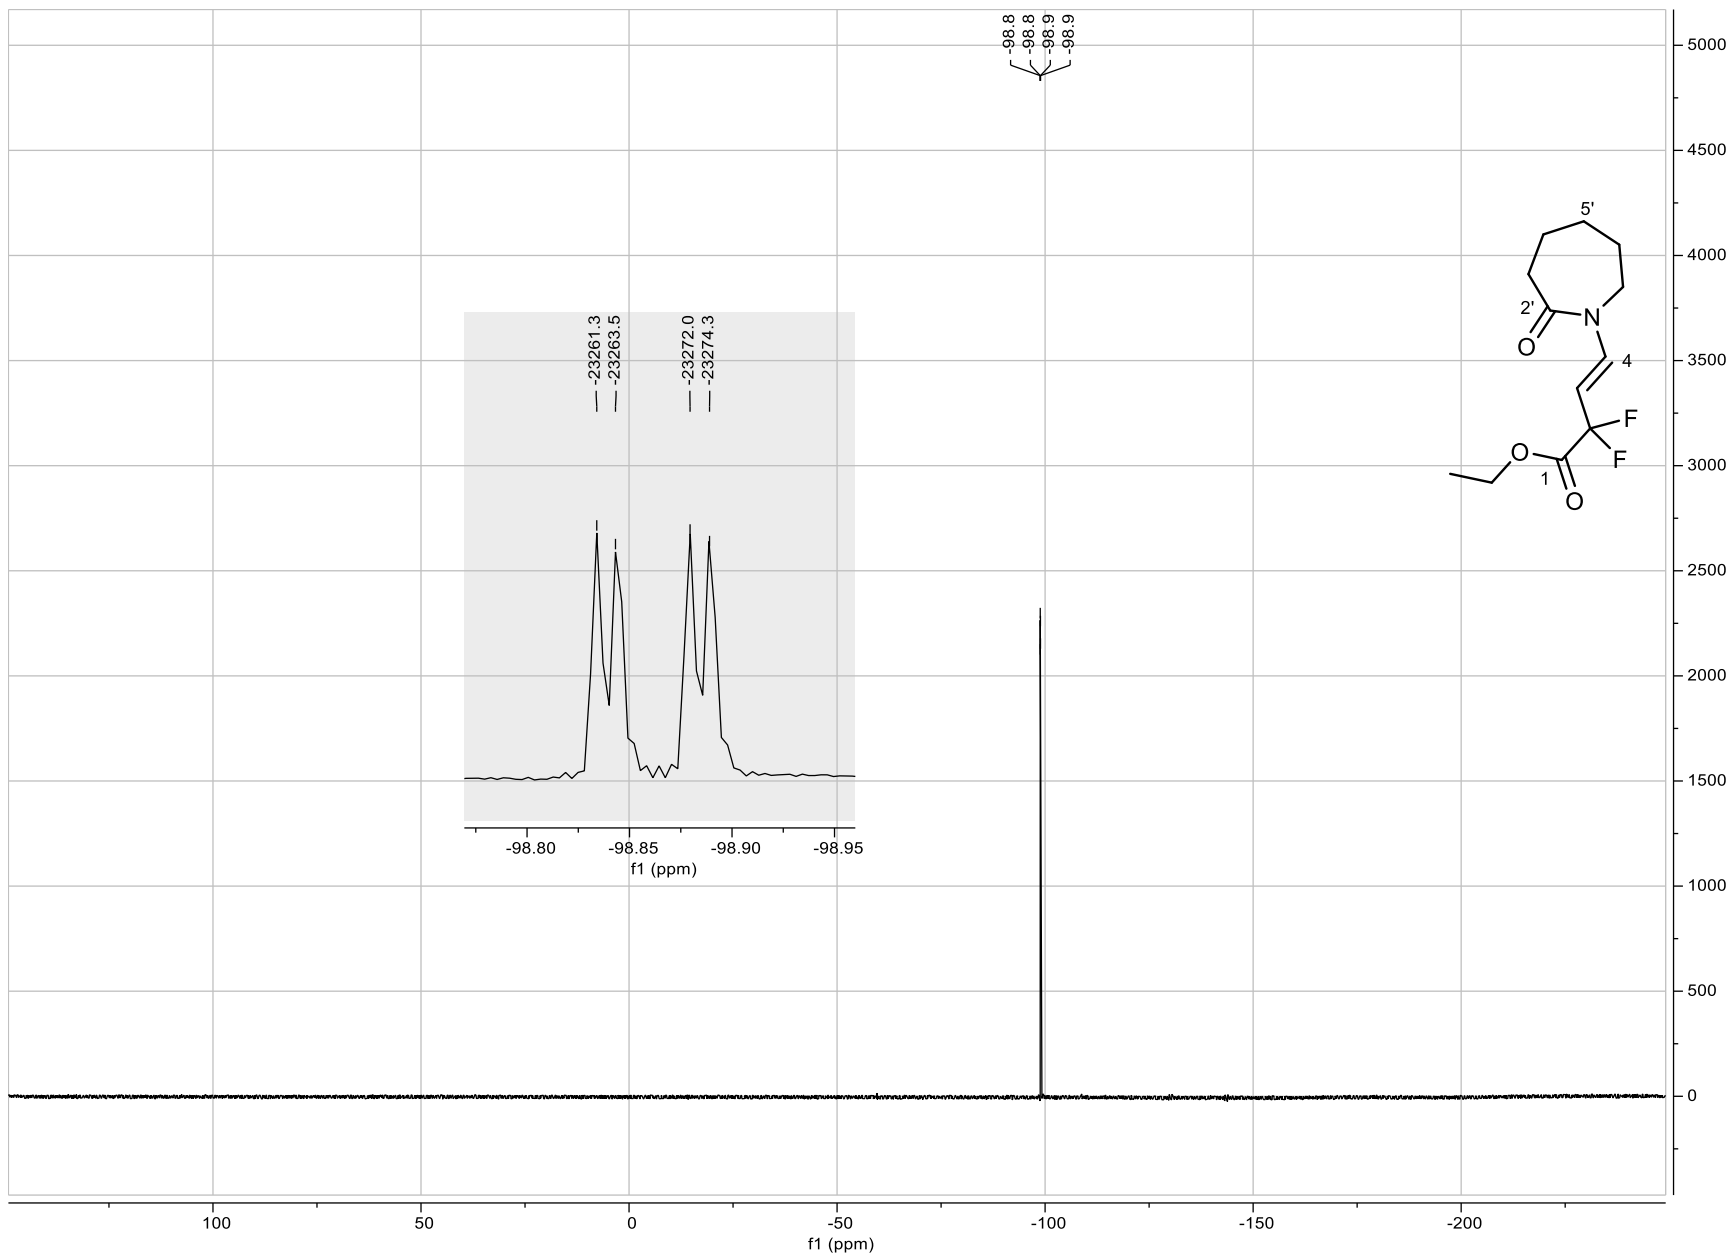



<sup>1</sup>H NMR (400 MHz, CDCl<sub>3</sub>/TMS) Spectrum of Compound 3i.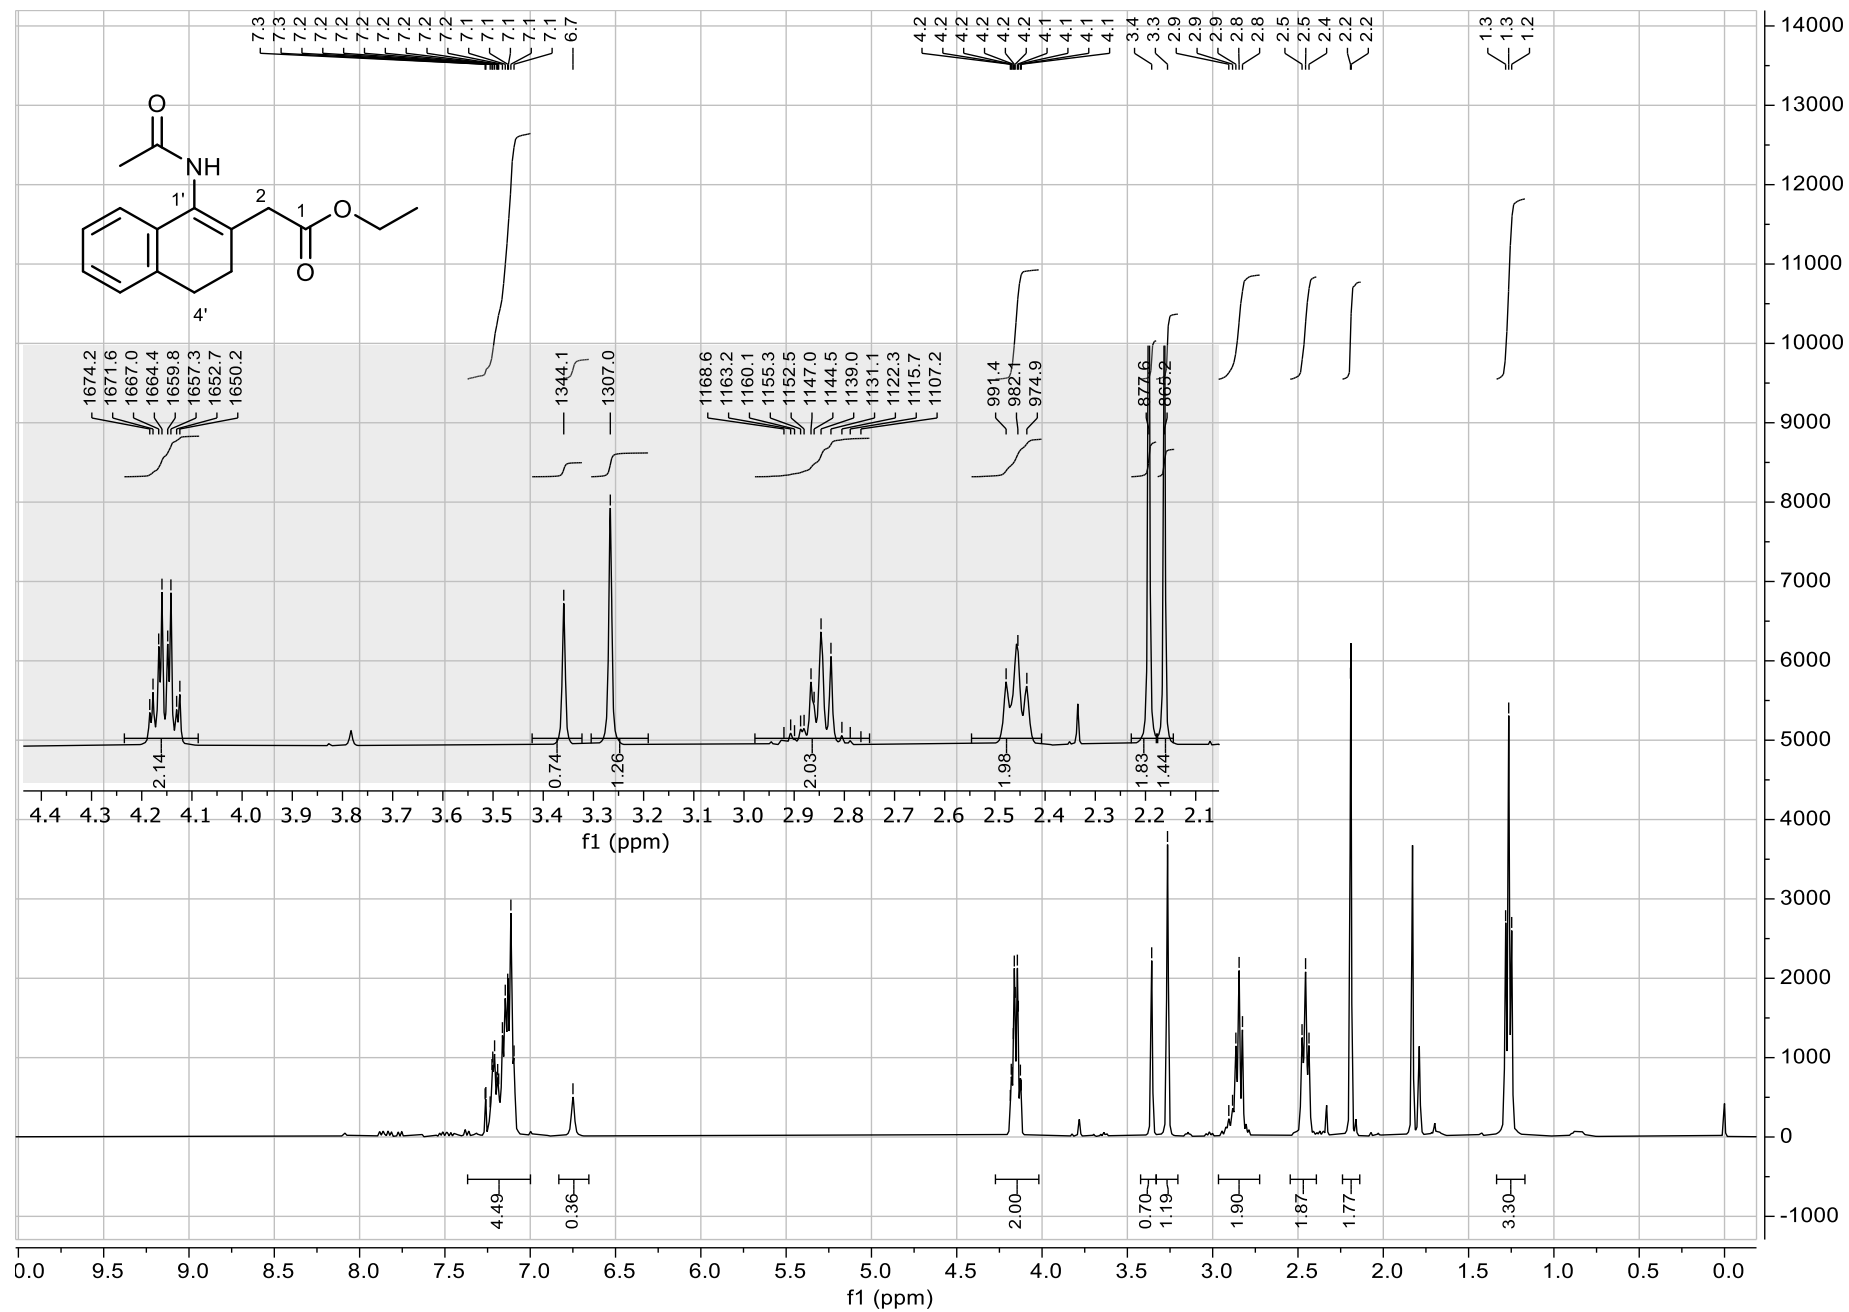

**$^{13}\text{C}$  NMR (101 MHz,  $\text{CDCl}_3$ ) Analysis of Compound 3i.**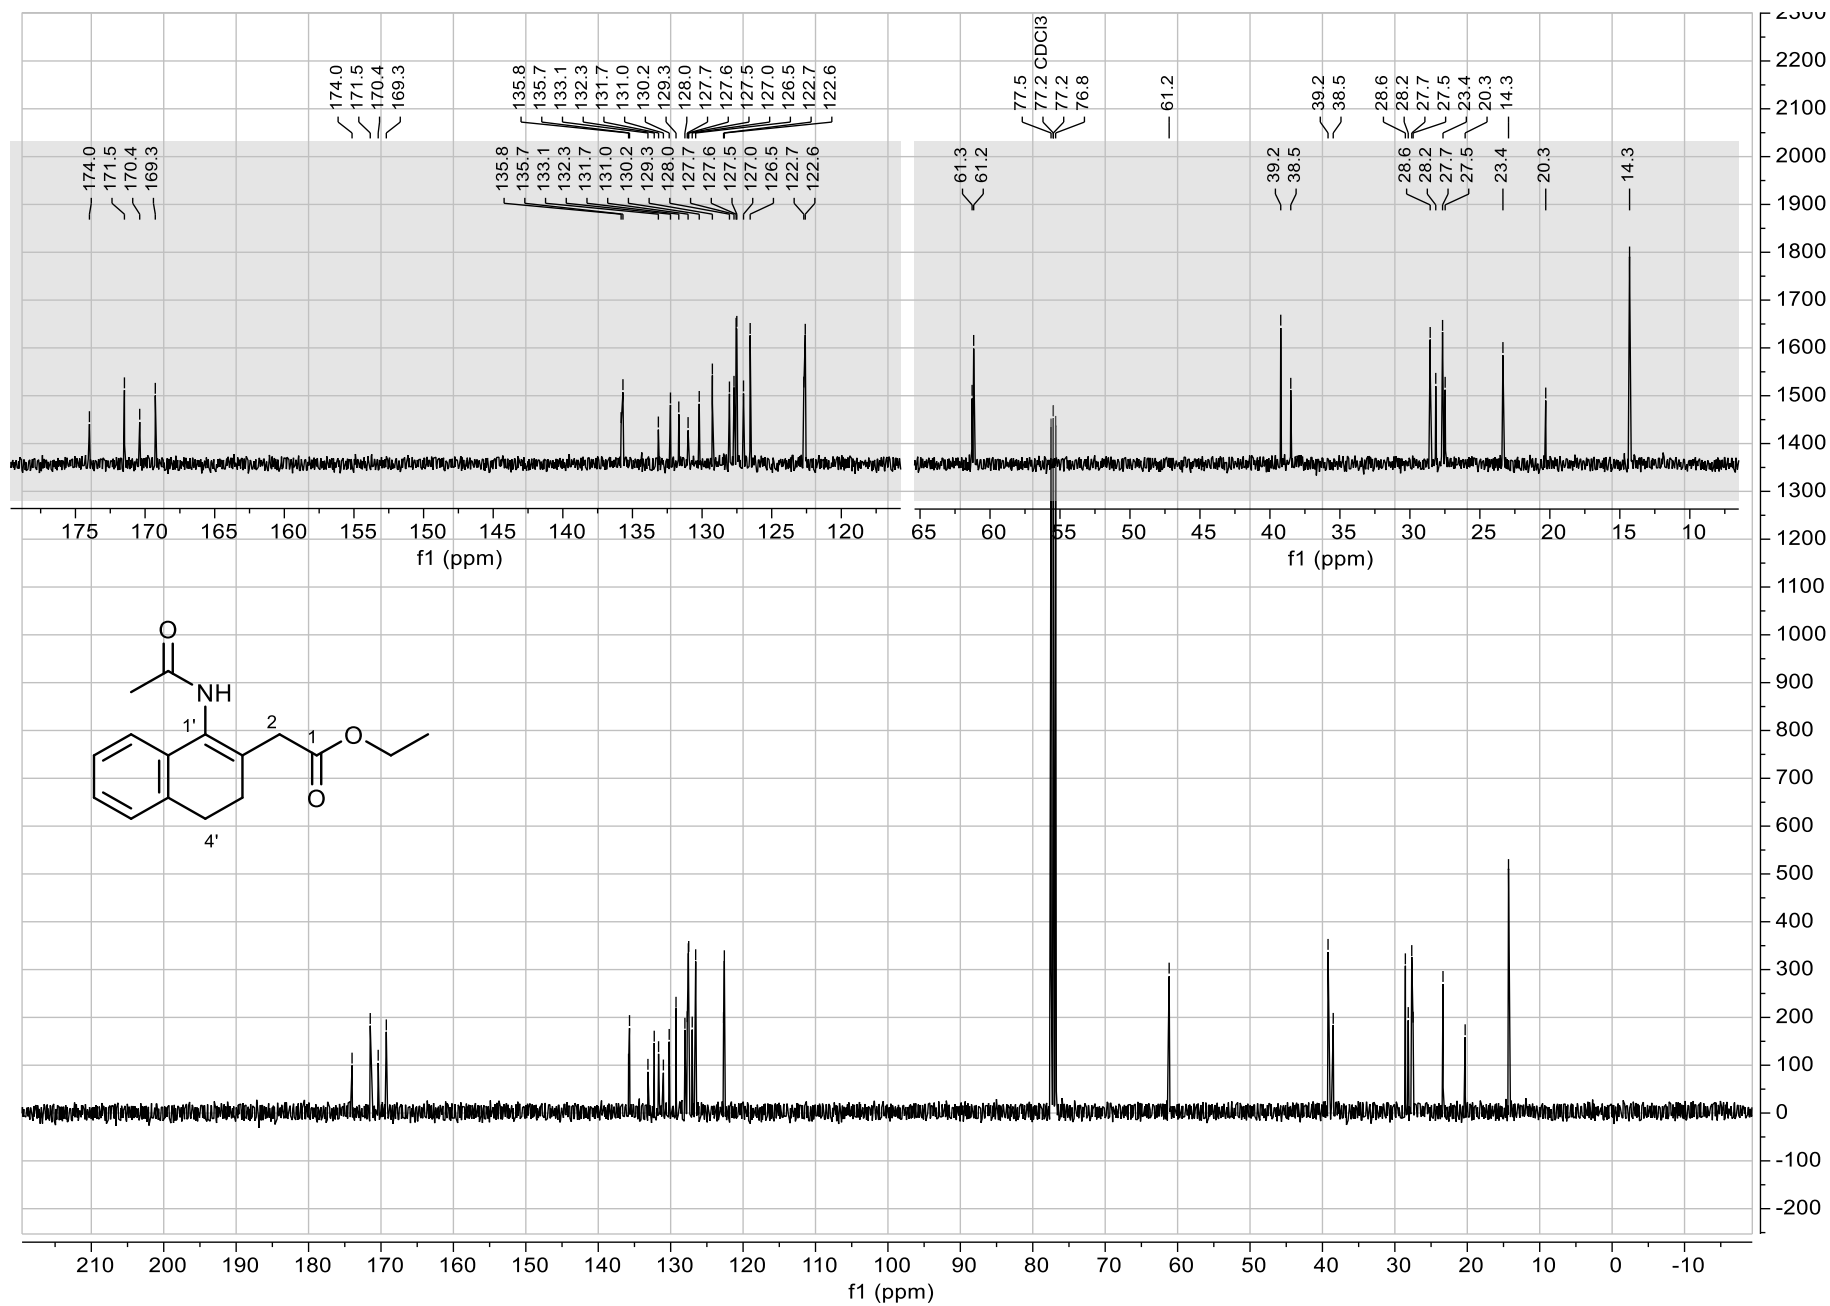

$^1\text{H}$  NMR (400 MHz,  $\text{CDCl}_3$ ) Spectrum of Compound 3j.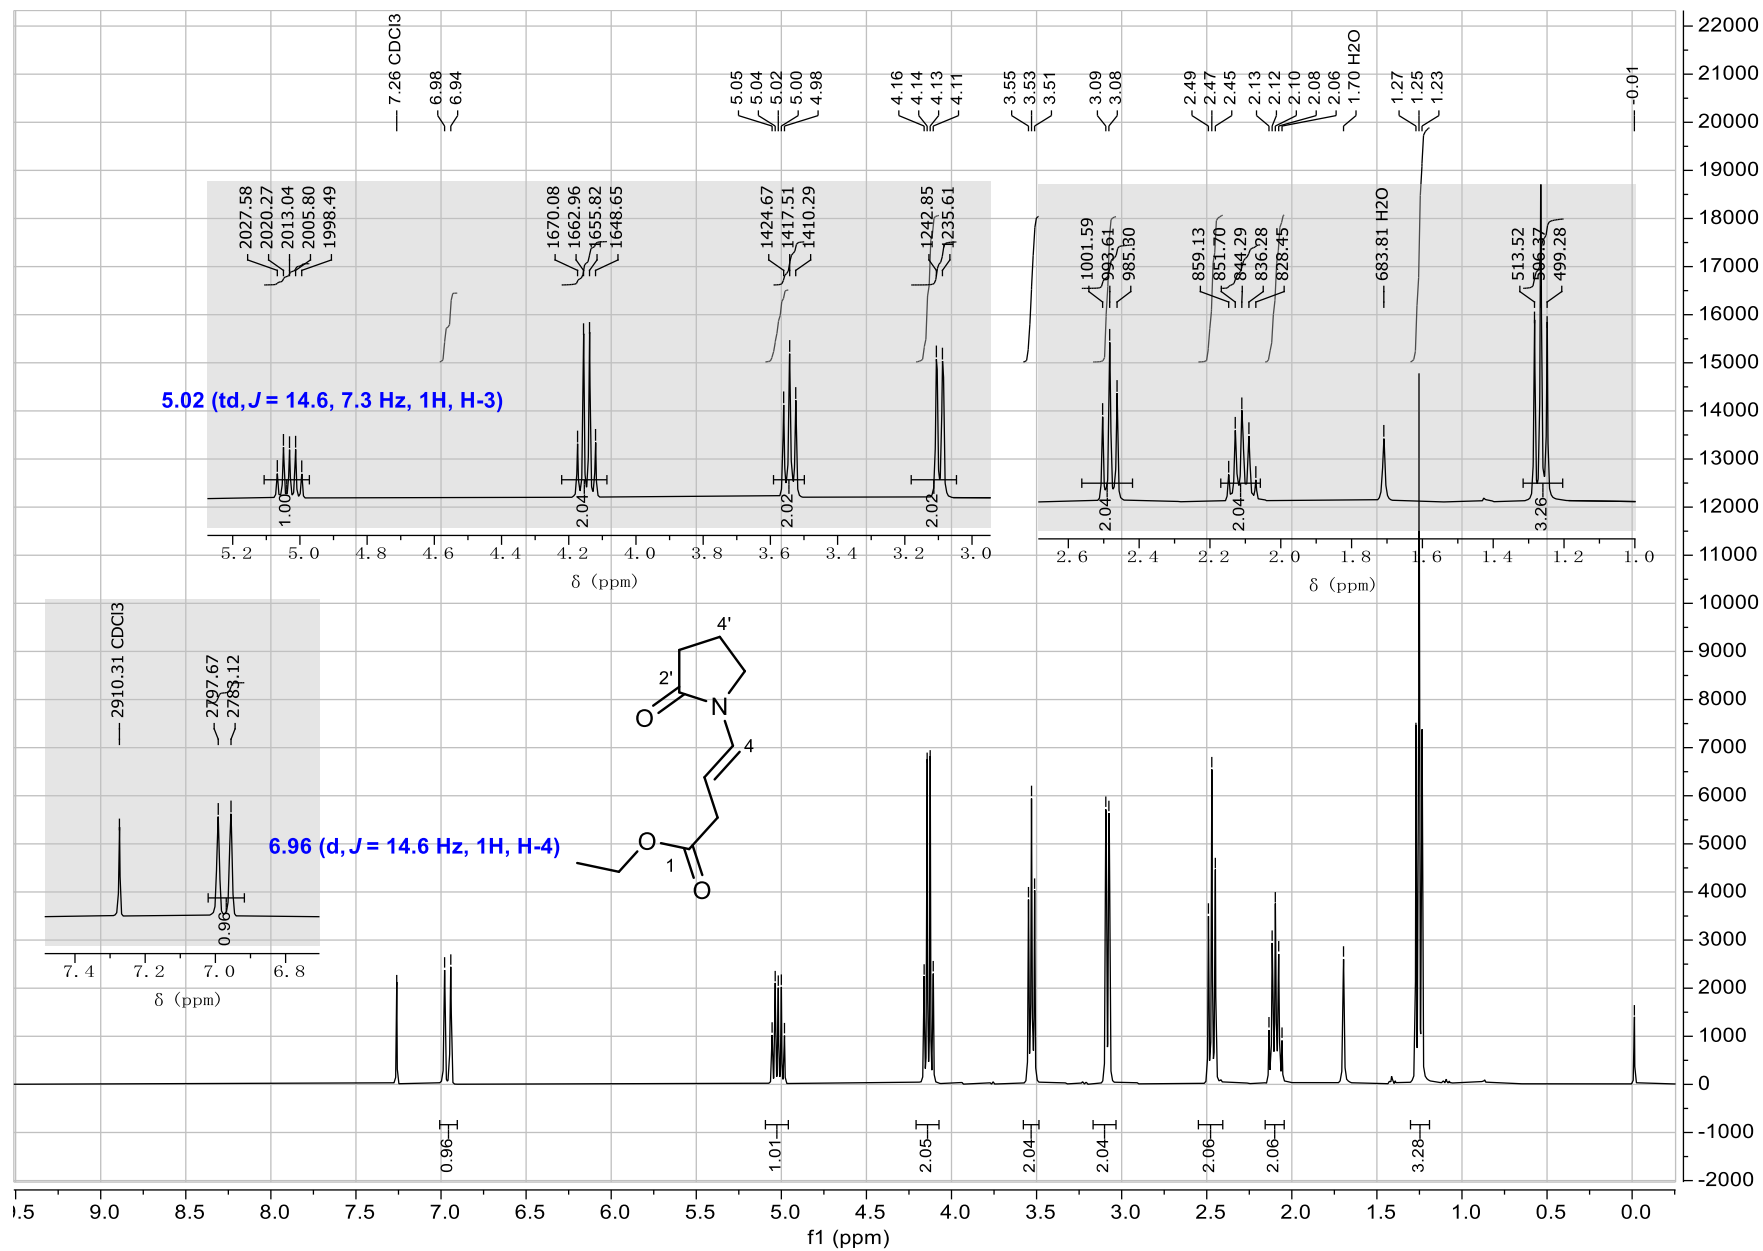

$^{13}\text{C}$  NMR (101 MHz,  $\text{CDCl}_3$ ) Spectrum of Compound 3j.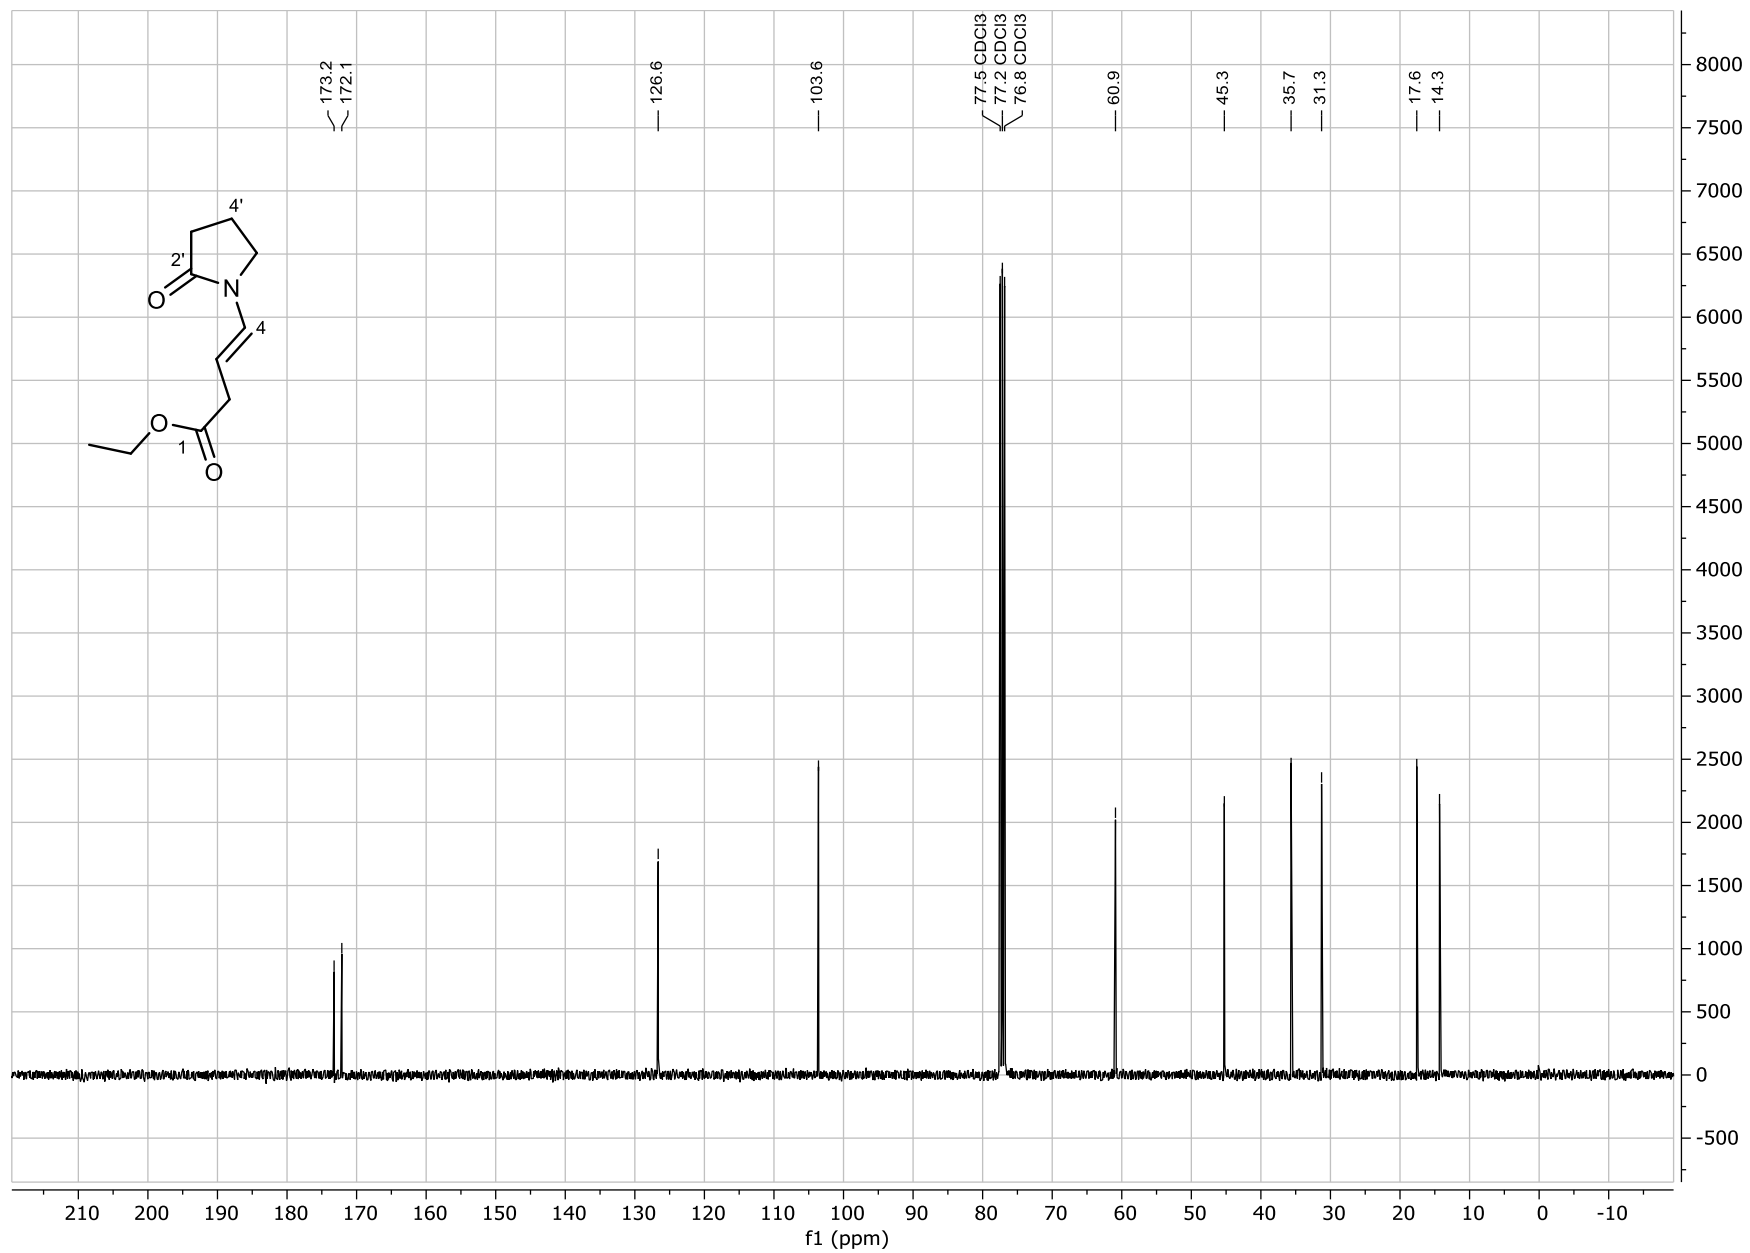

$^1\text{H}$  NMR (400 MHz,  $\text{CDCl}_3/\text{TMS}$ ) Spectrum of Compound 3k.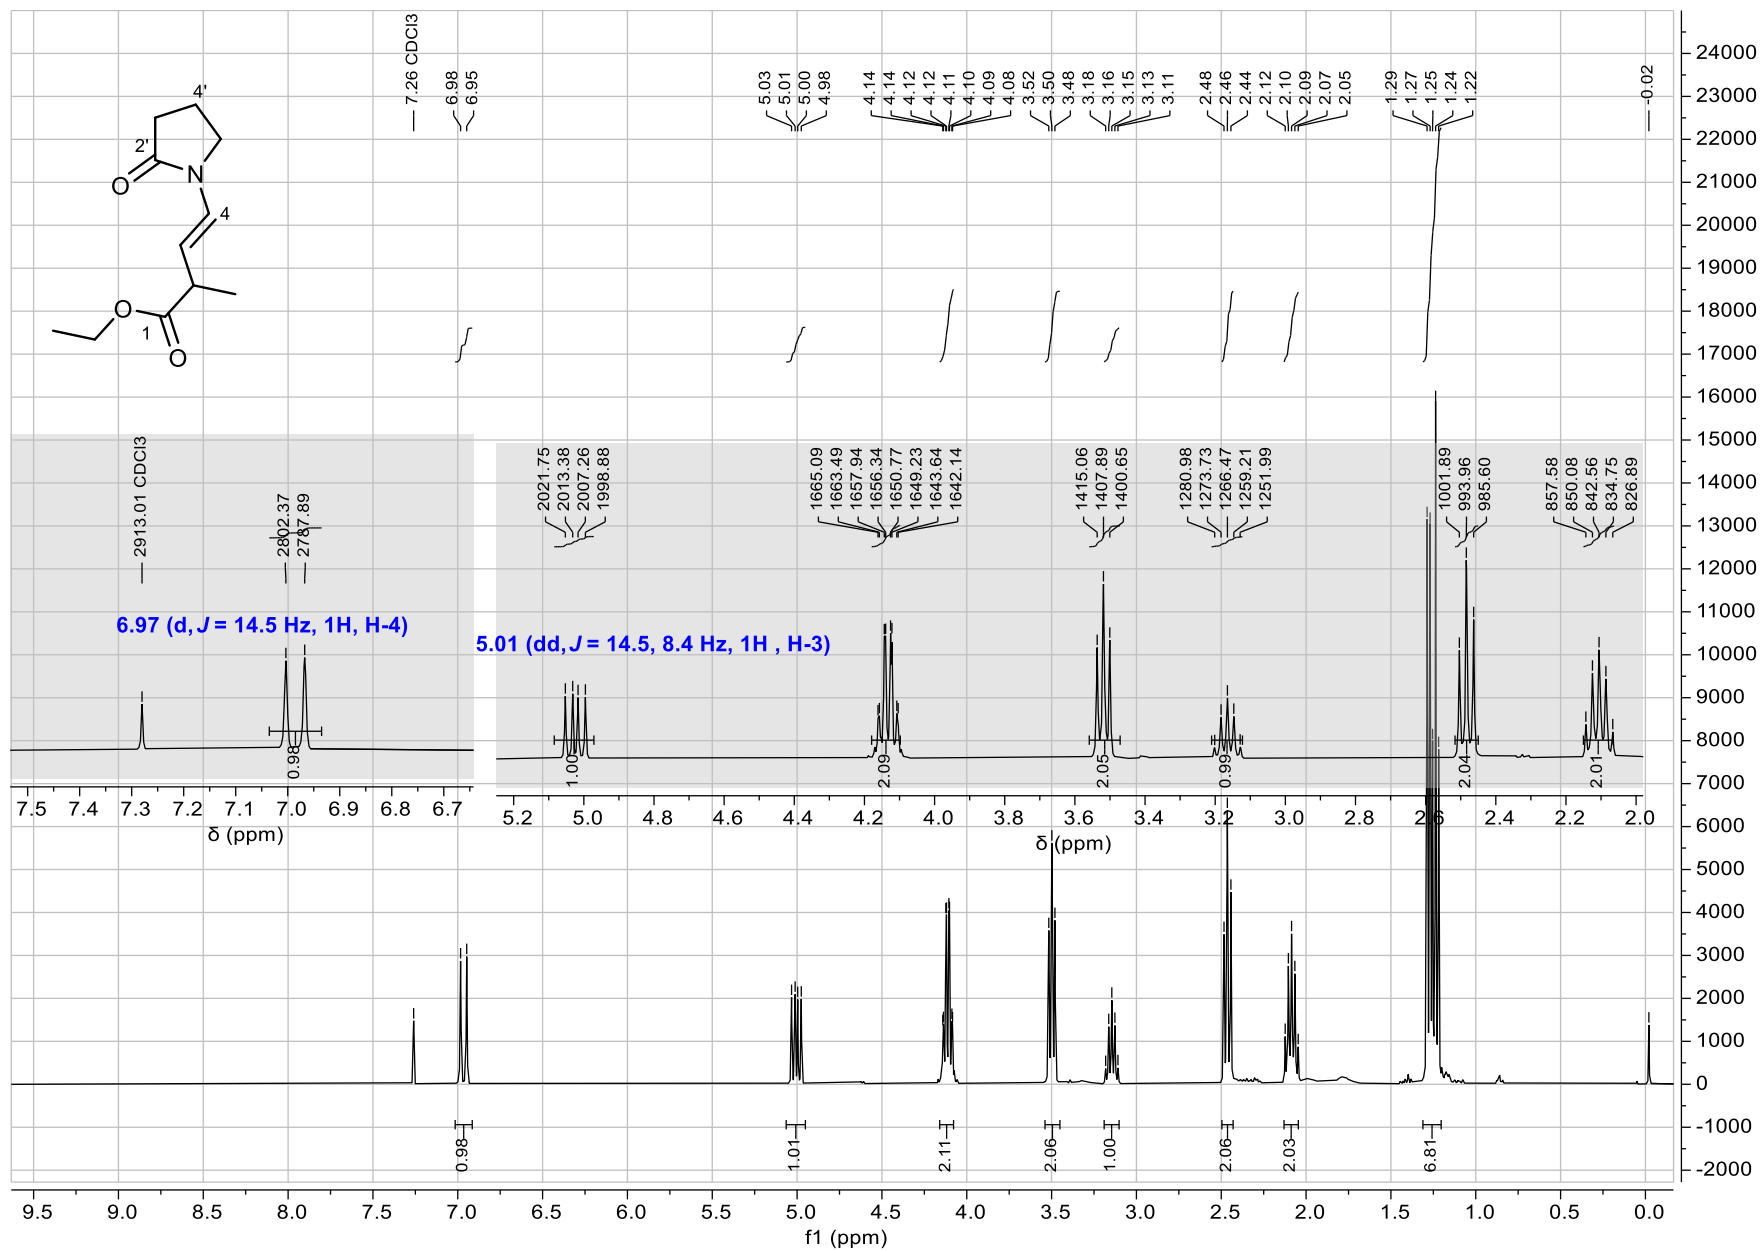

$^{13}\text{C}$  NMR (101 MHz,  $\text{CDCl}_3$ ) Spectrum of Compound 3k.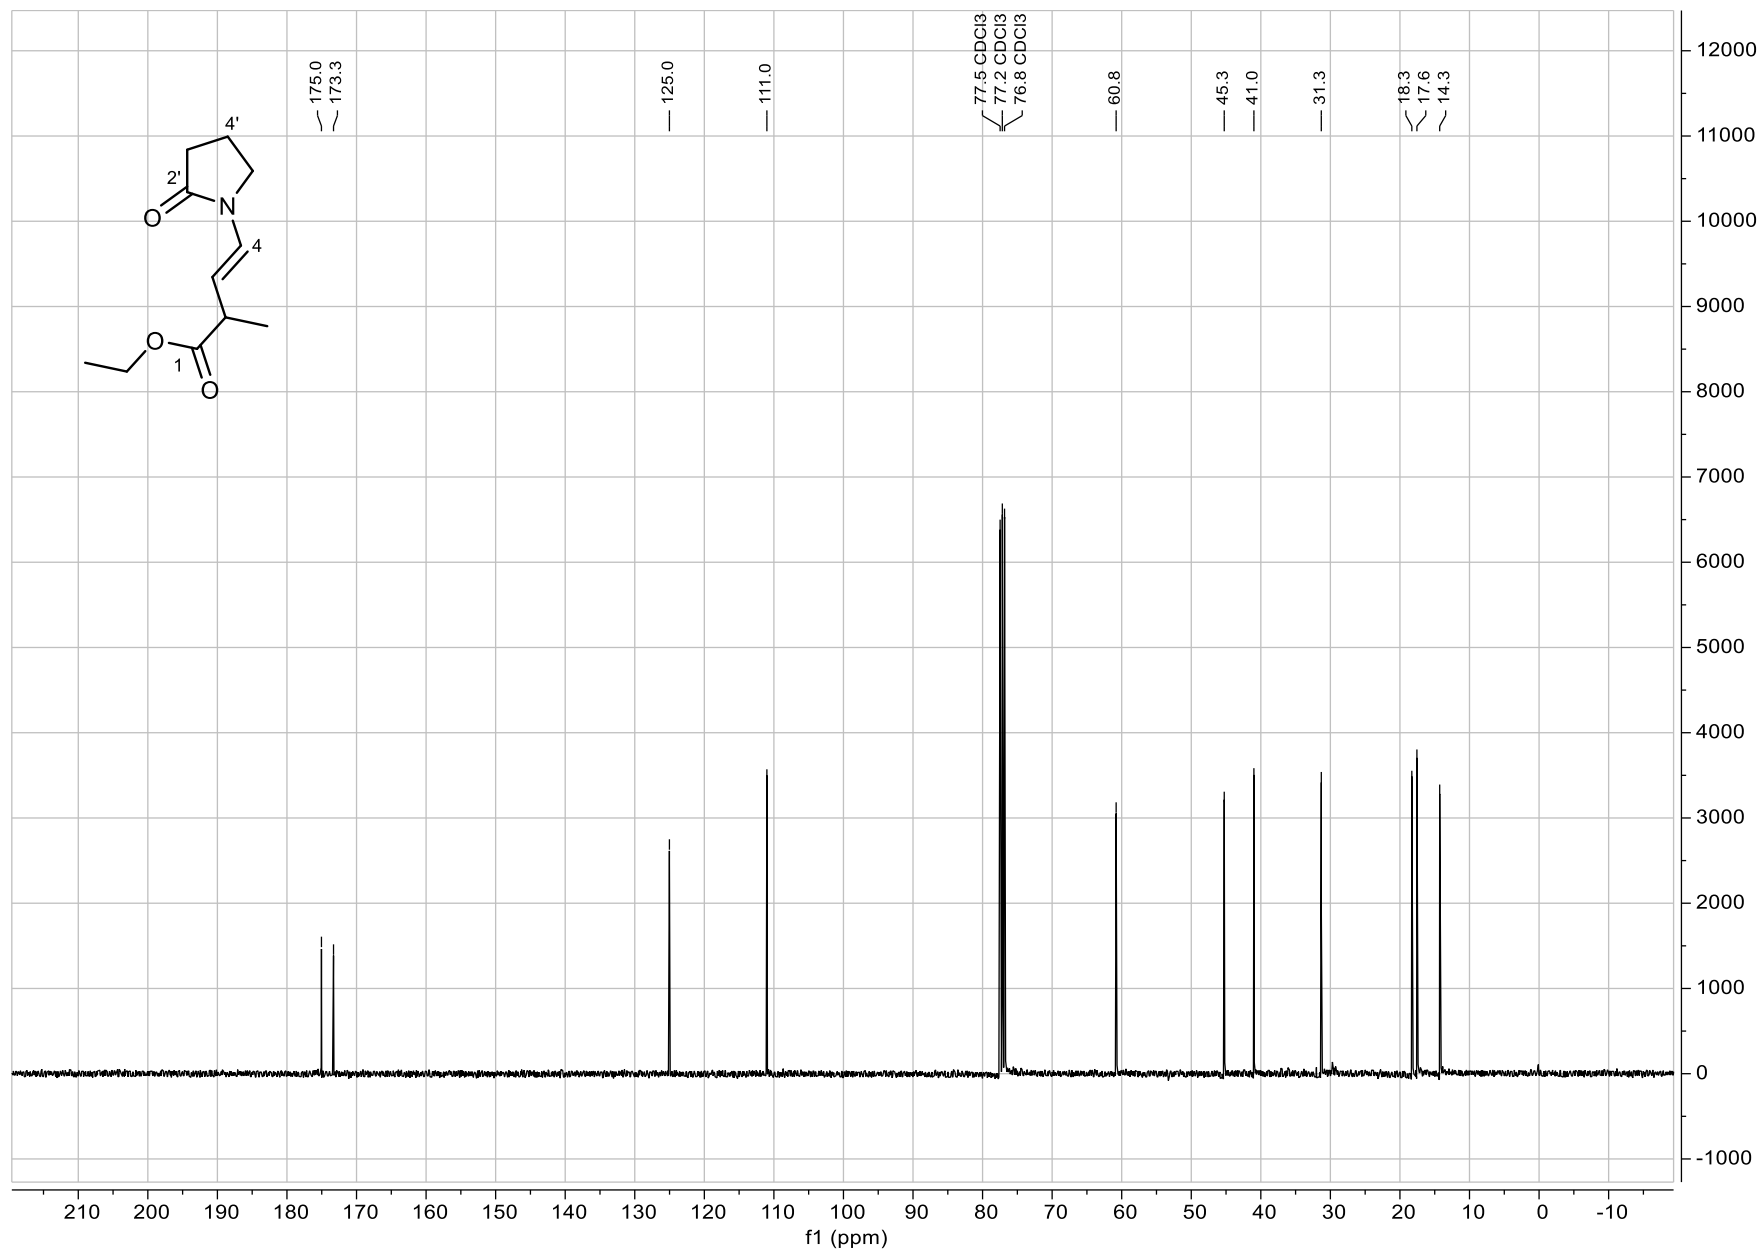

$^1\text{H}$  NMR (400 MHz,  $\text{CDCl}_3$ ) Spectrum of Compound 3I.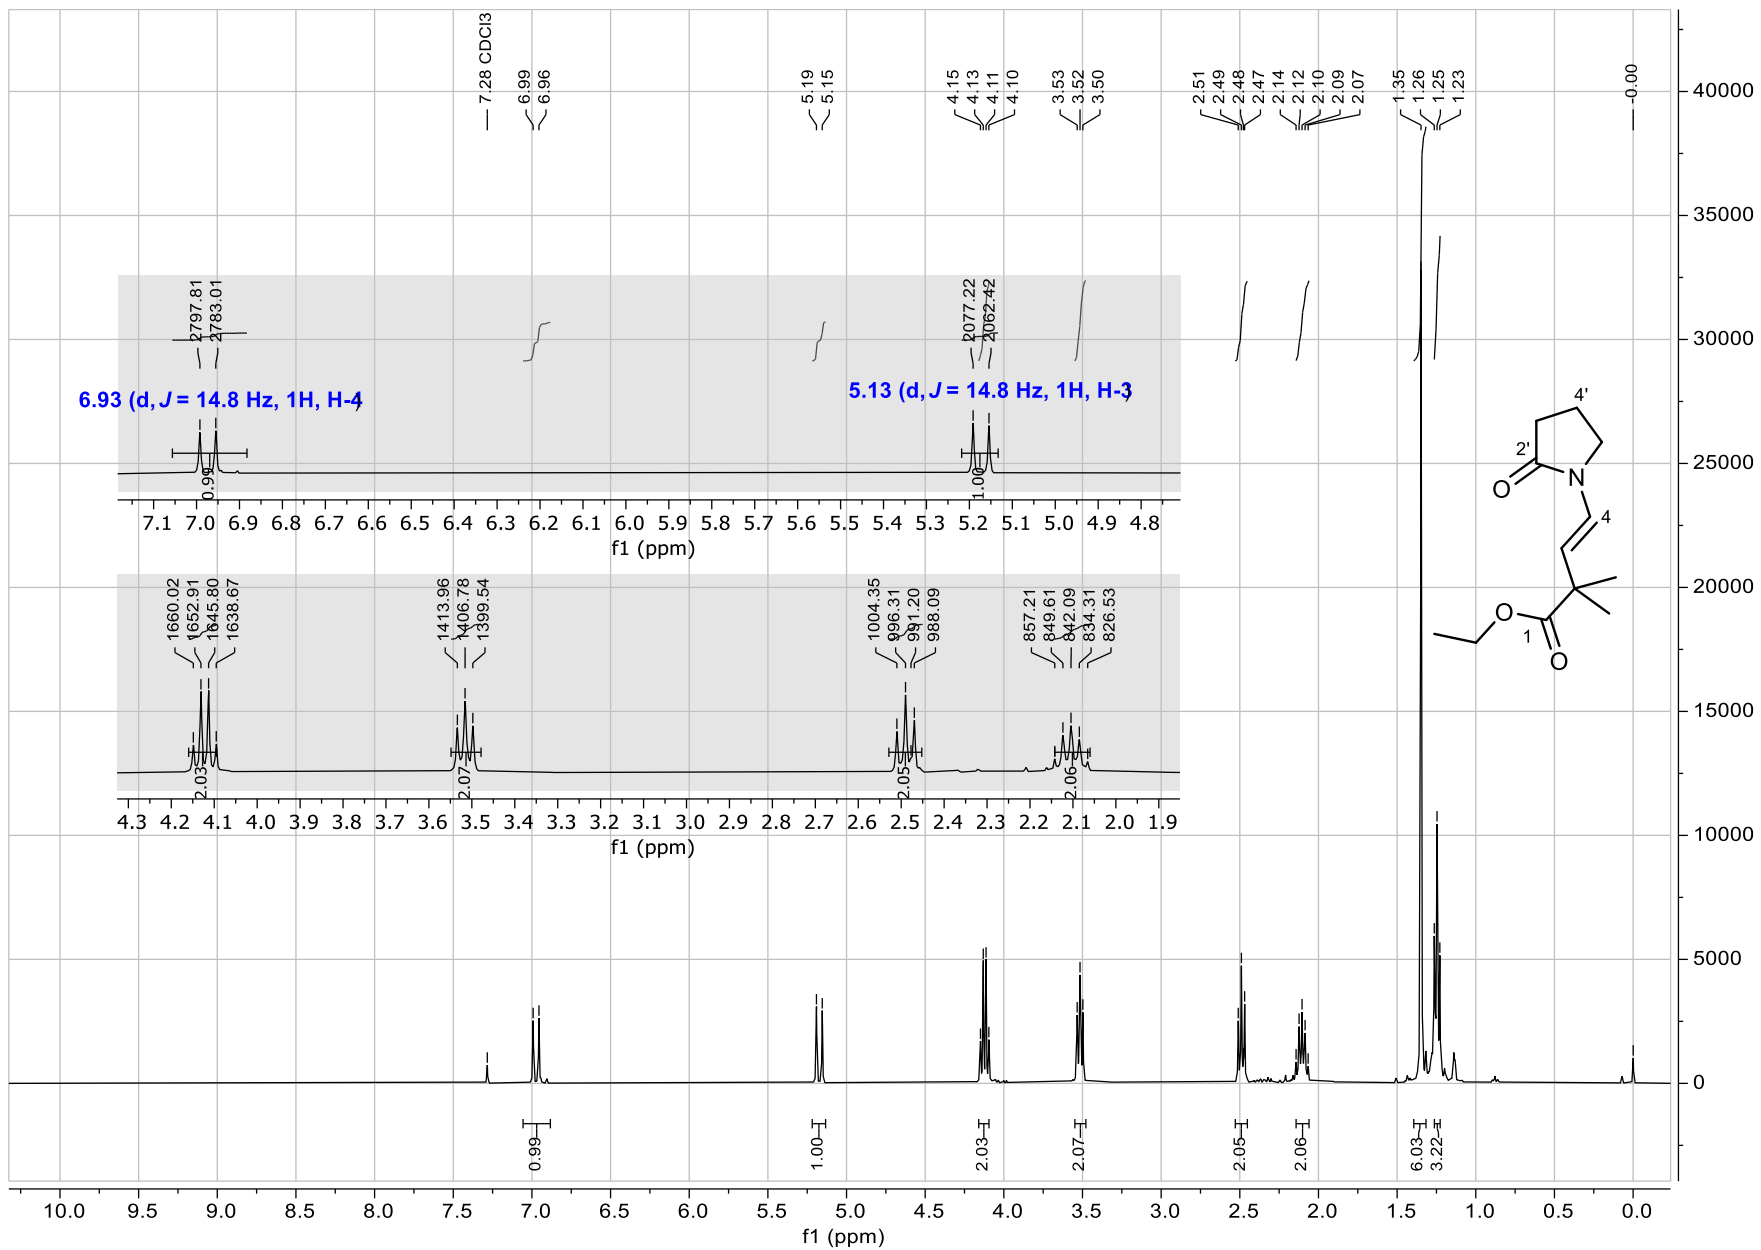

$^{13}\text{C}$  NMR (101 MHz,  $\text{CDCl}_3$ ) Spectrum of Compound 3I.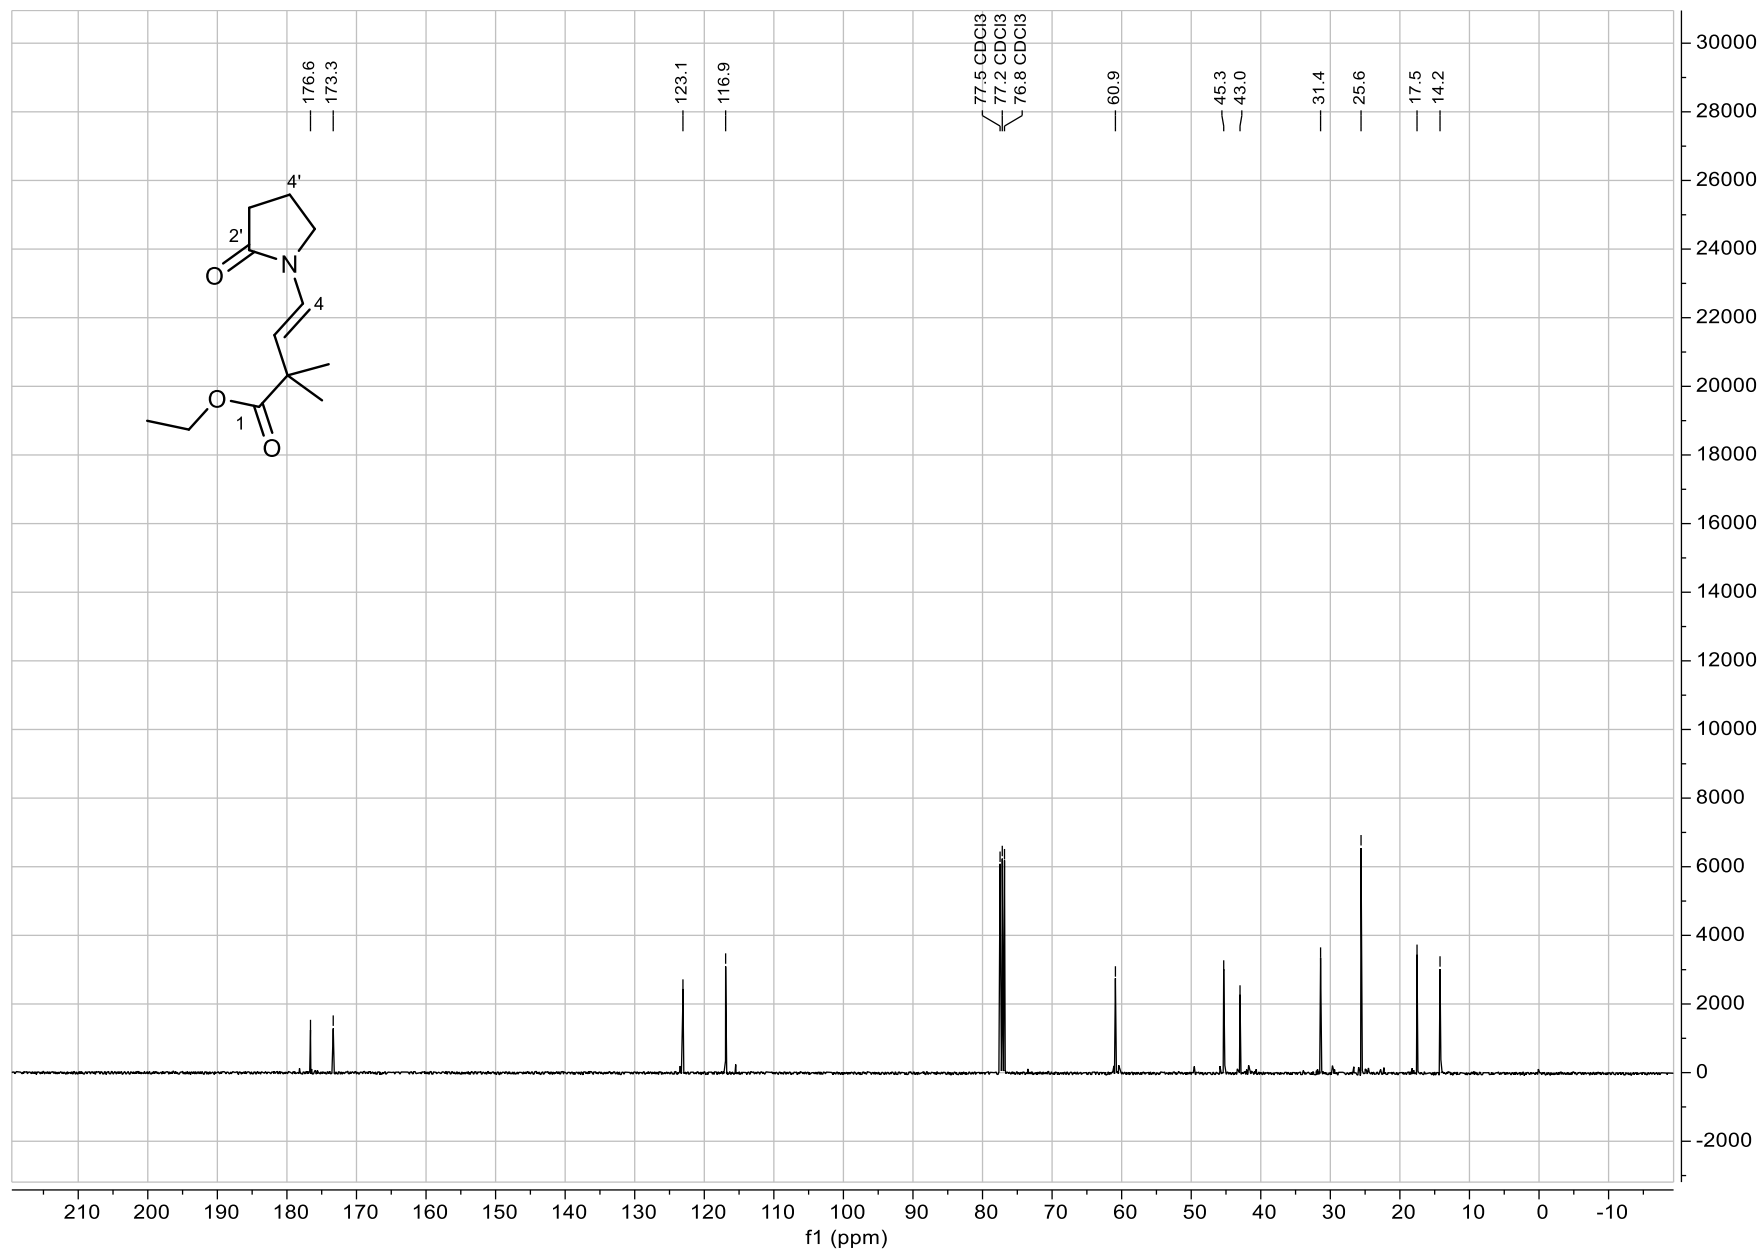



$^1\text{H}$  NMR (400 MHz,  $\text{CDCl}_3$ ) Spectrum of Compound 3m.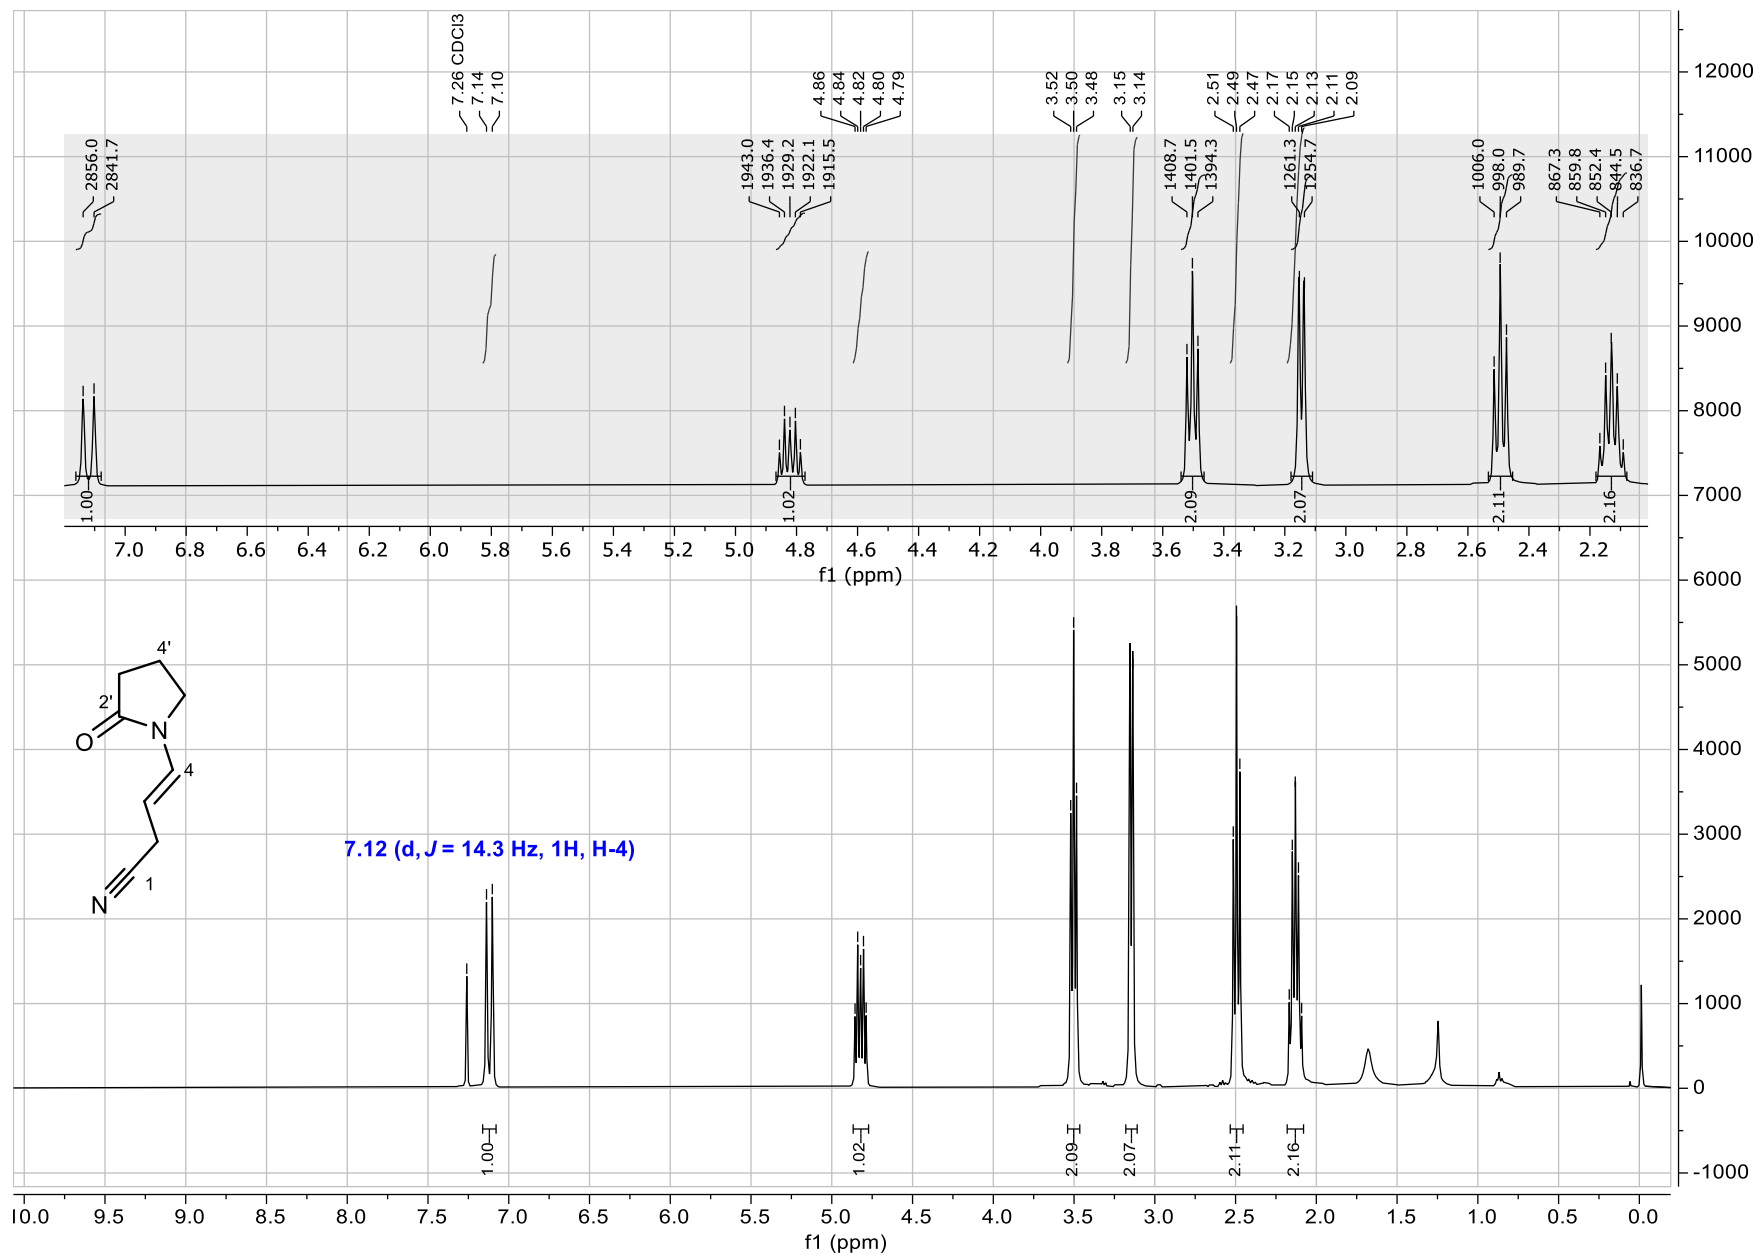

$^{13}\text{C}$  NMR (101 MHz,  $\text{CDCl}_3$ ) Spectrum of Compound 3m.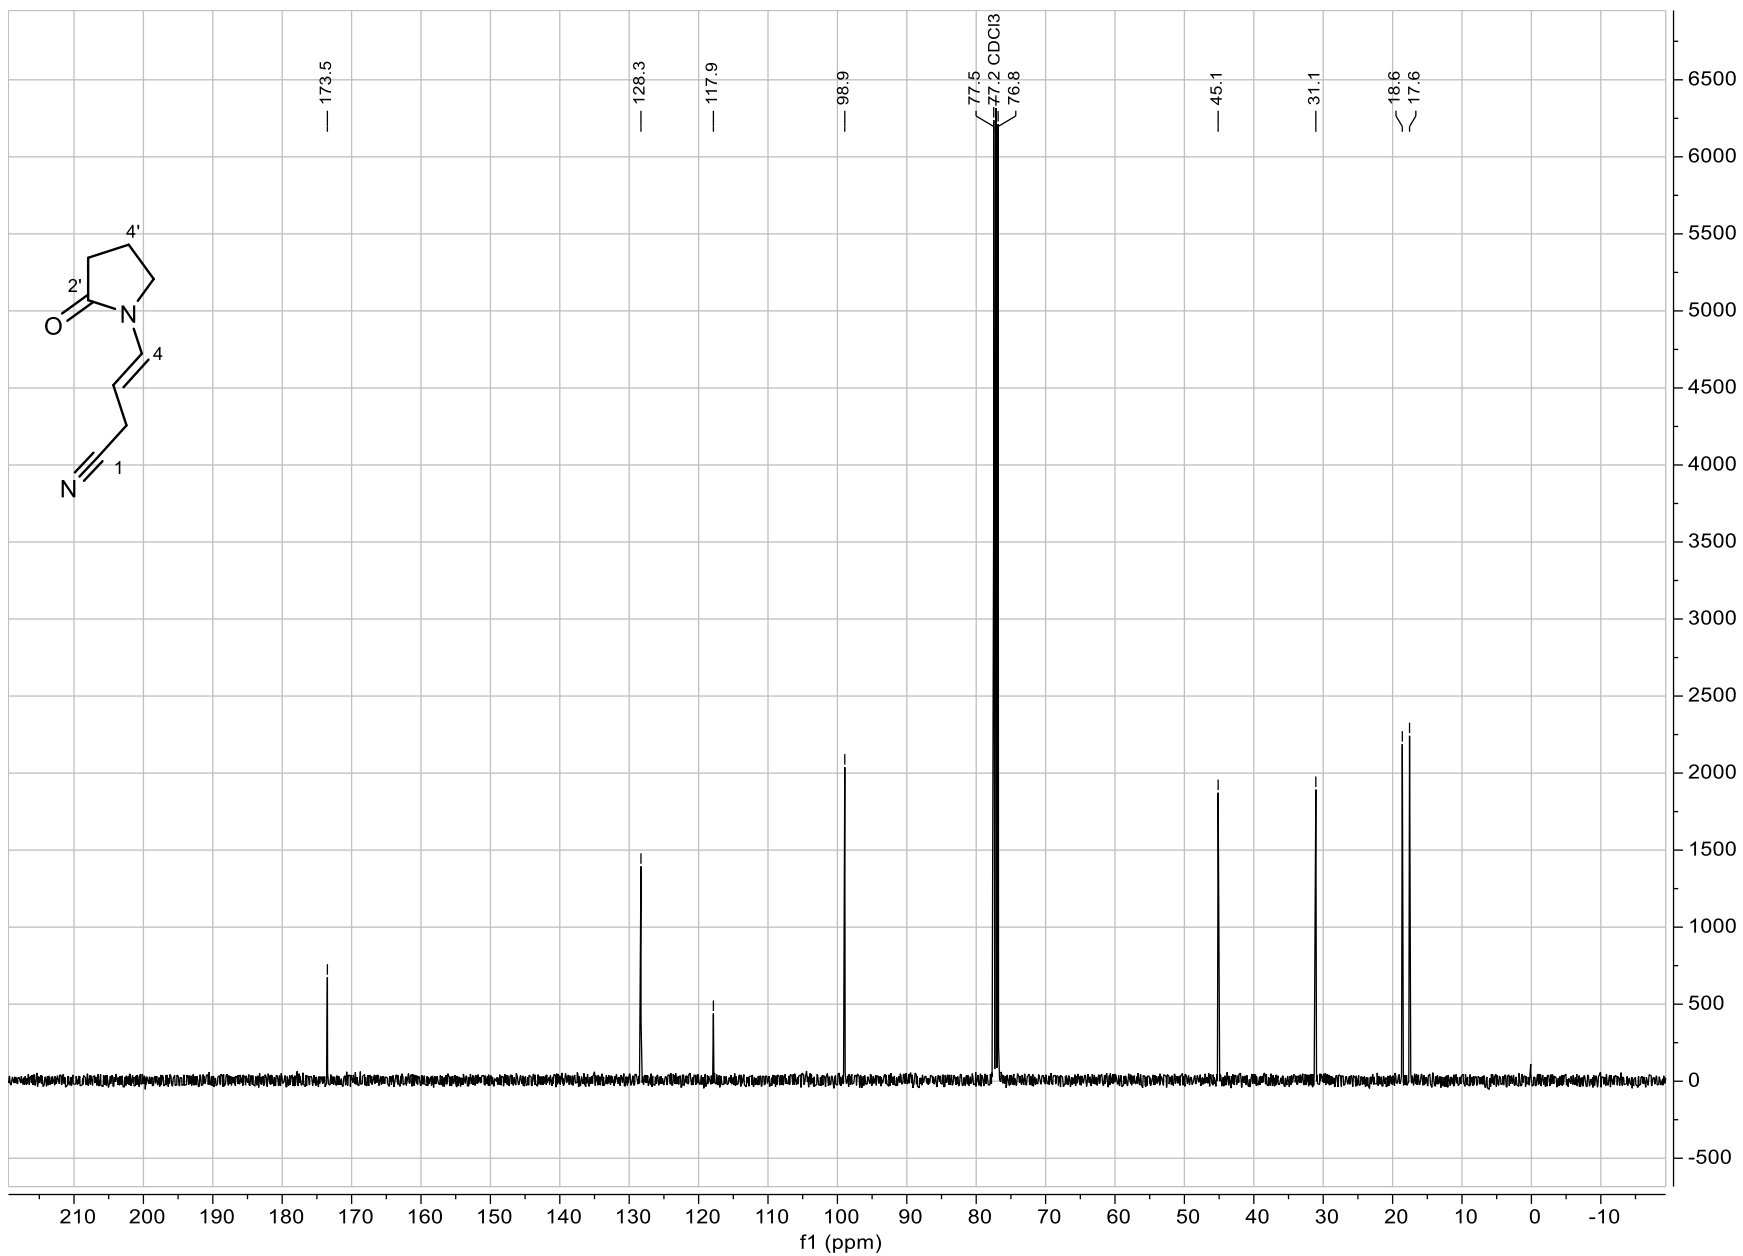

<sup>1</sup>H NMR (400 MHz, CDCl<sub>3</sub>) Spectrum of Compound 3n.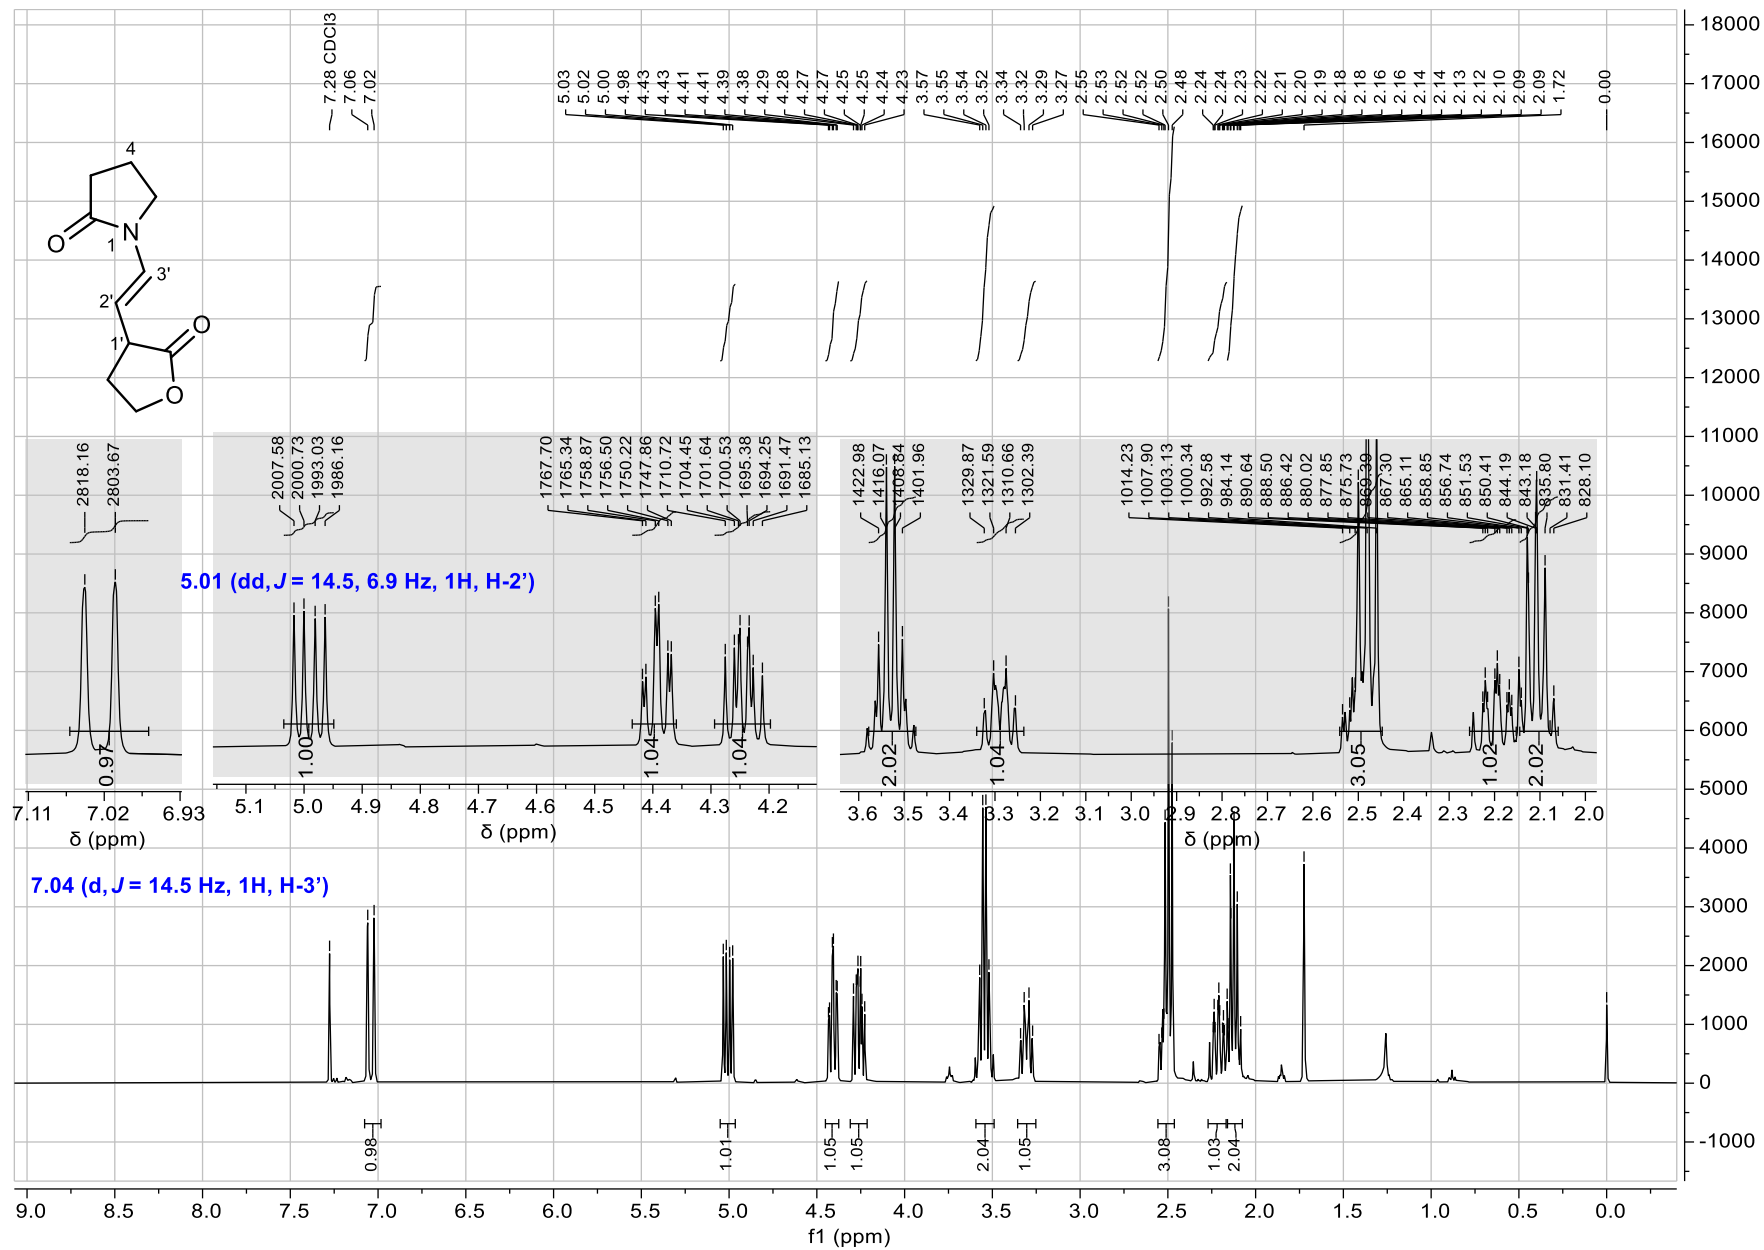

$^{13}\text{C}$  NMR (101 MHz,  $\text{CDCl}_3$ ) Spectrum of Compound 3n.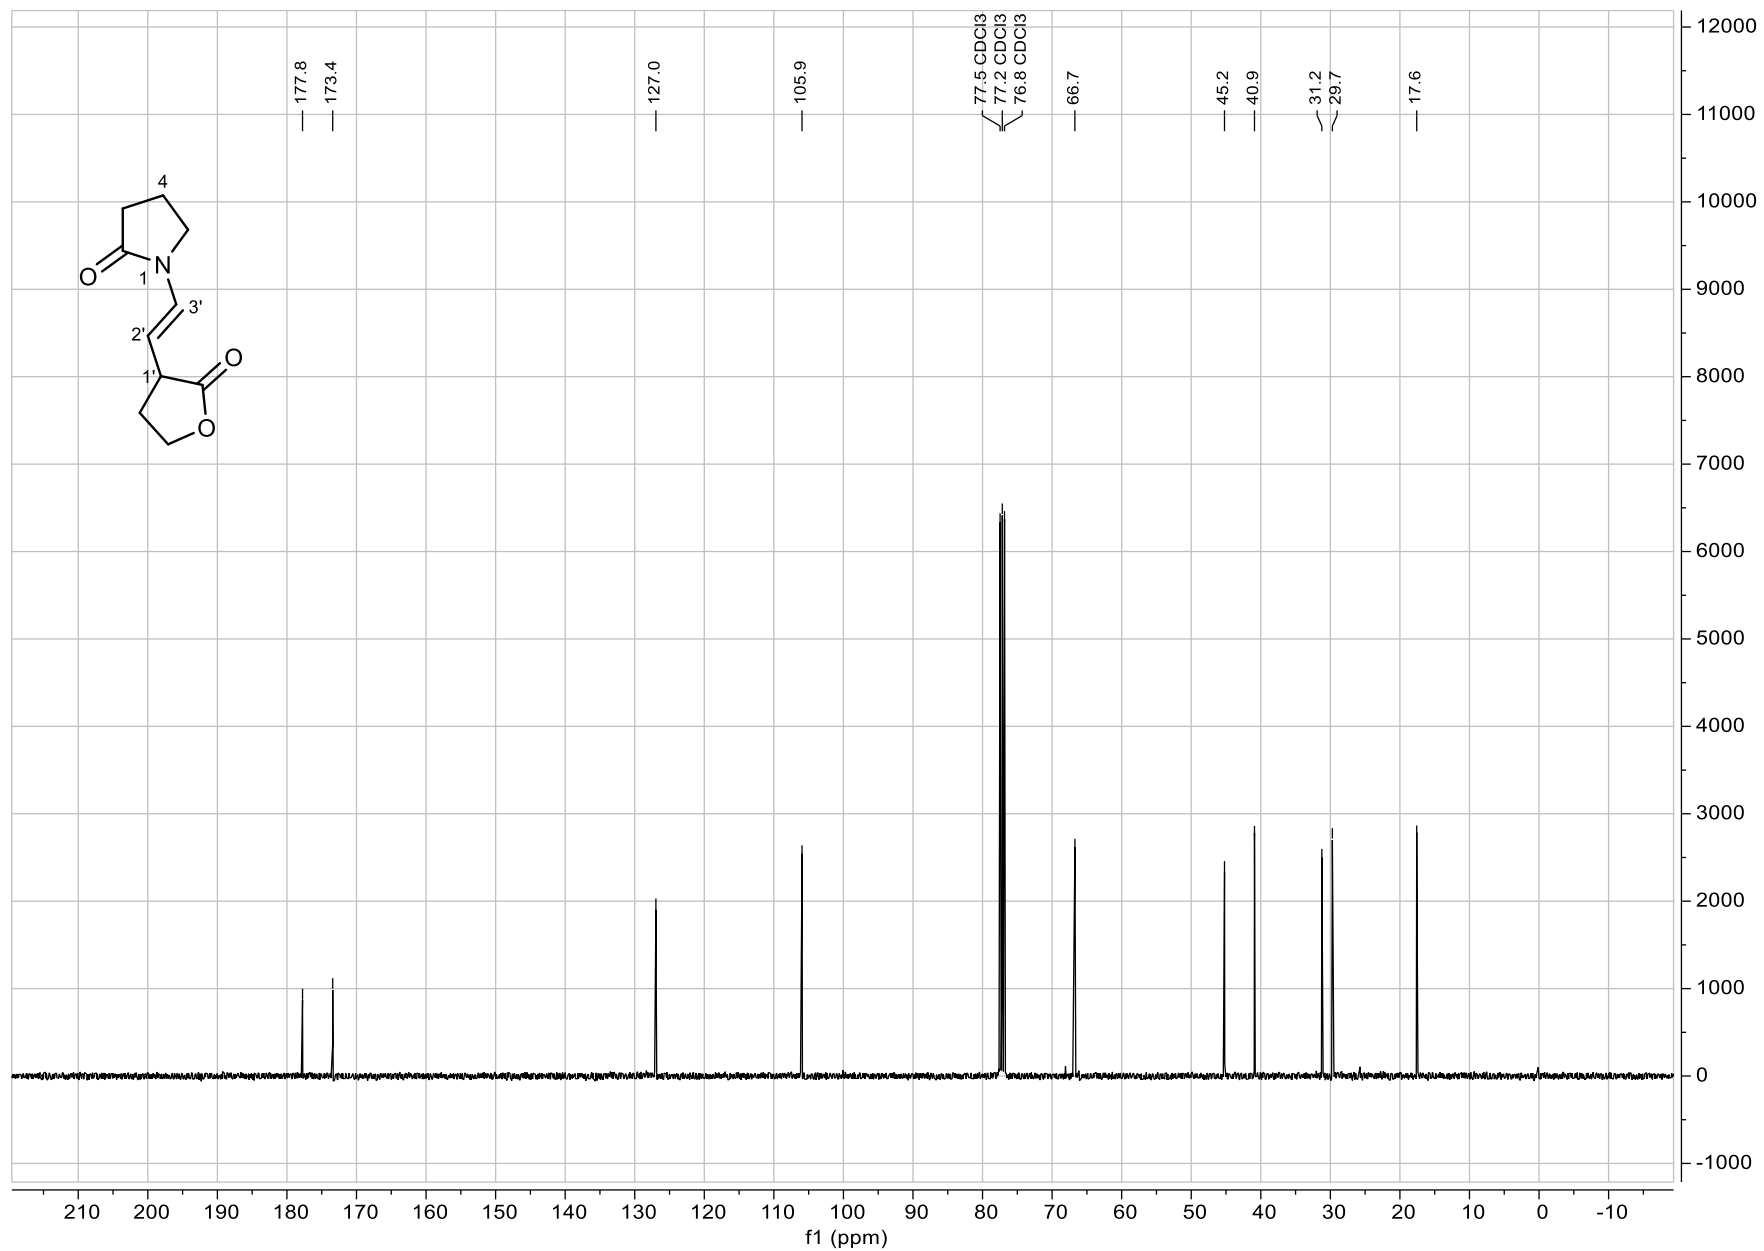

$^1\text{H}$  NMR (400 MHz,  $\text{CDCl}_3$ ) Spectrum of Compound 3o.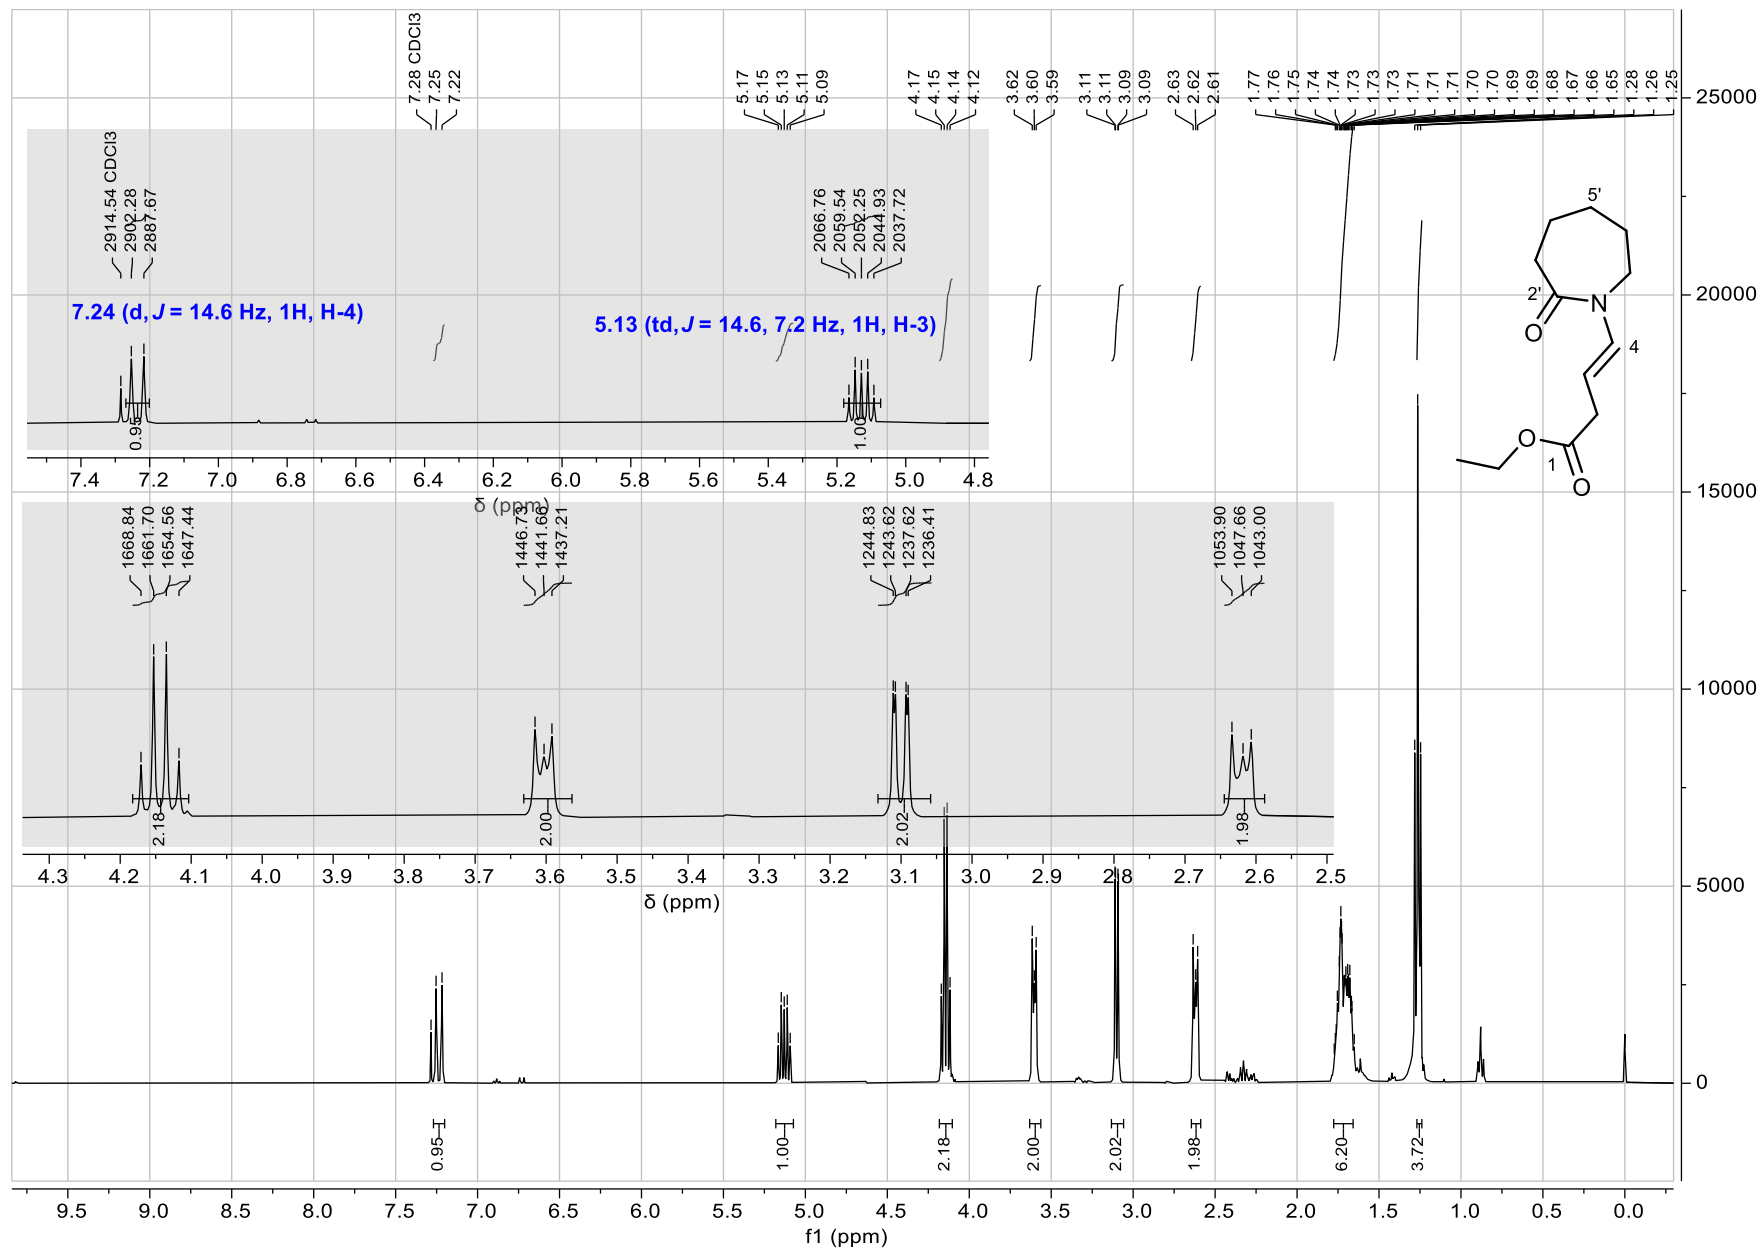

$^{13}\text{C}$  NMR (101 MHz,  $\text{CDCl}_3$ ) Spectrum of Compound 3o.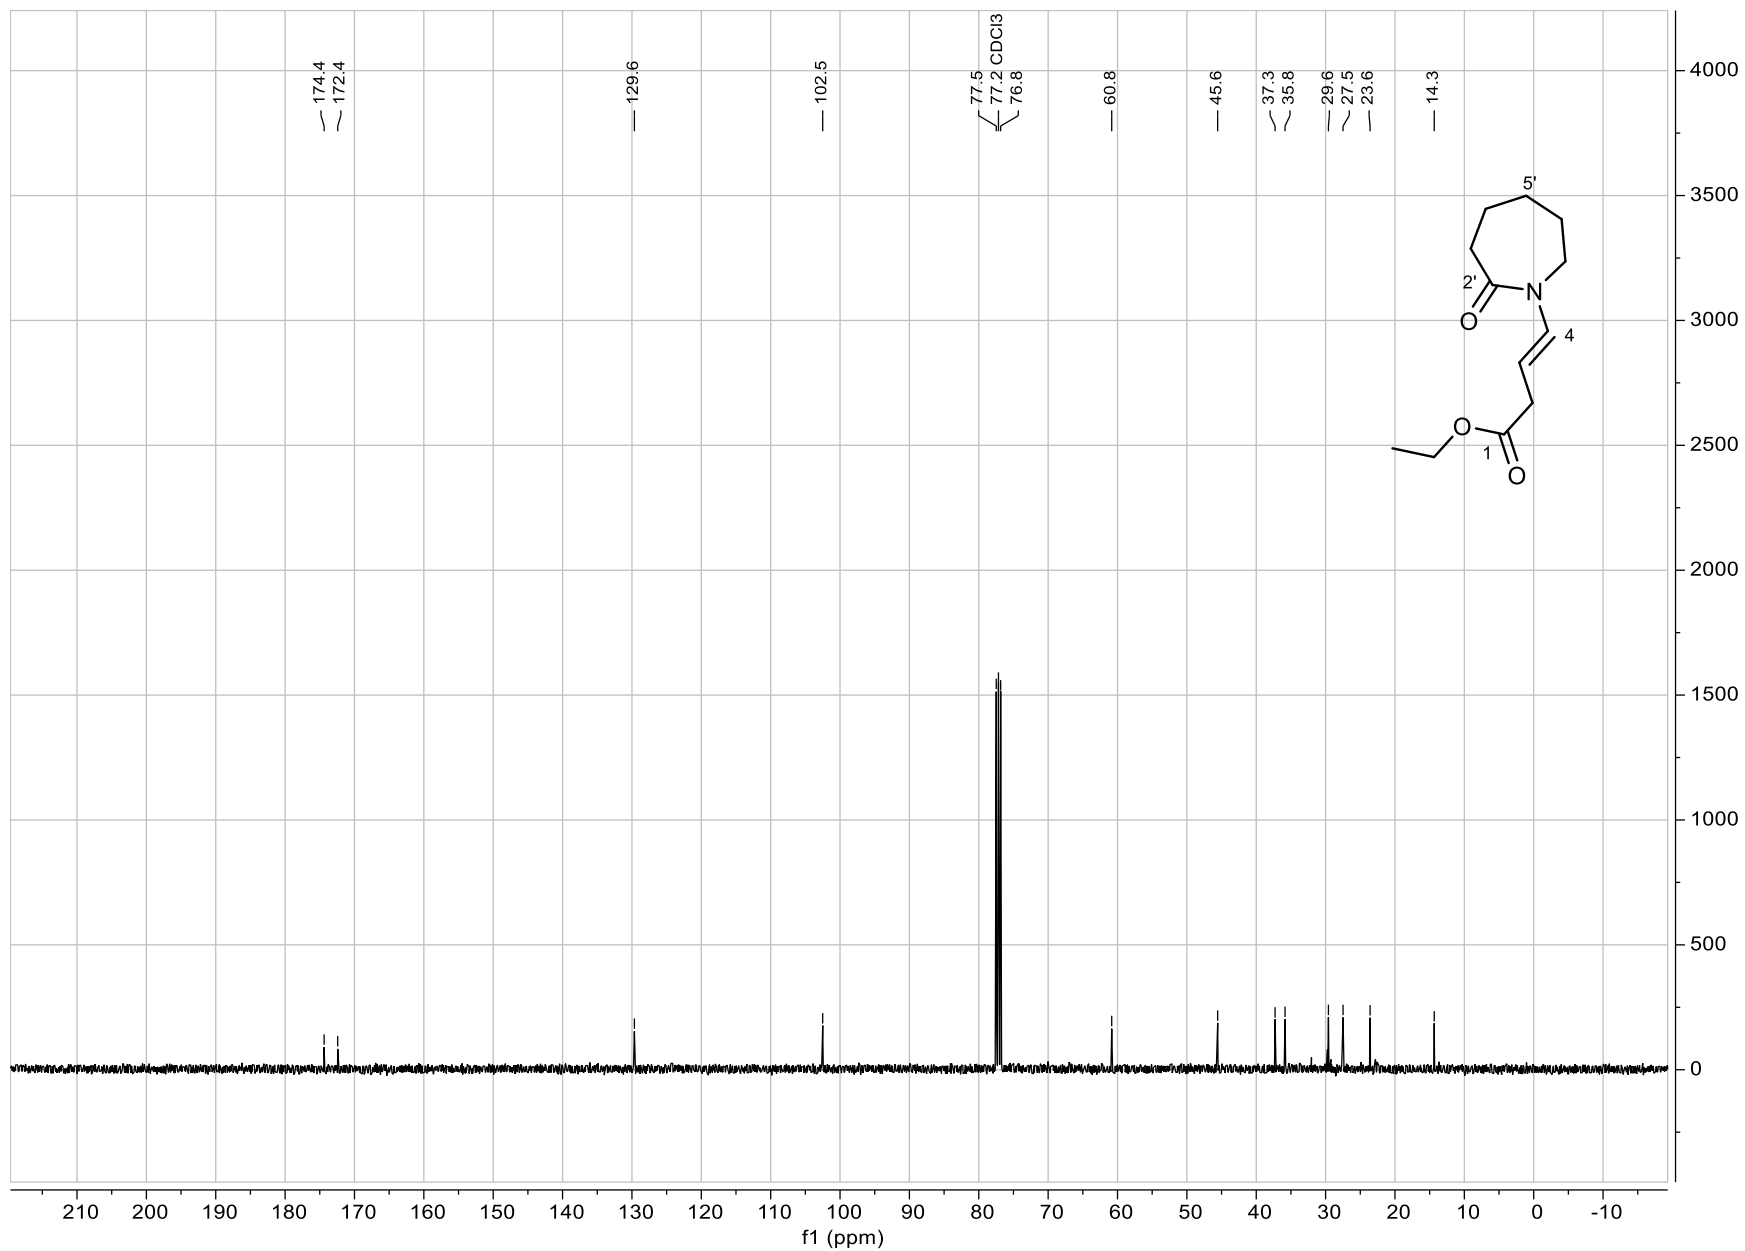

$^1\text{H}$  NMR (400 MHz,  $\text{CDCl}_3$ ) Spectrum of Compound 3p.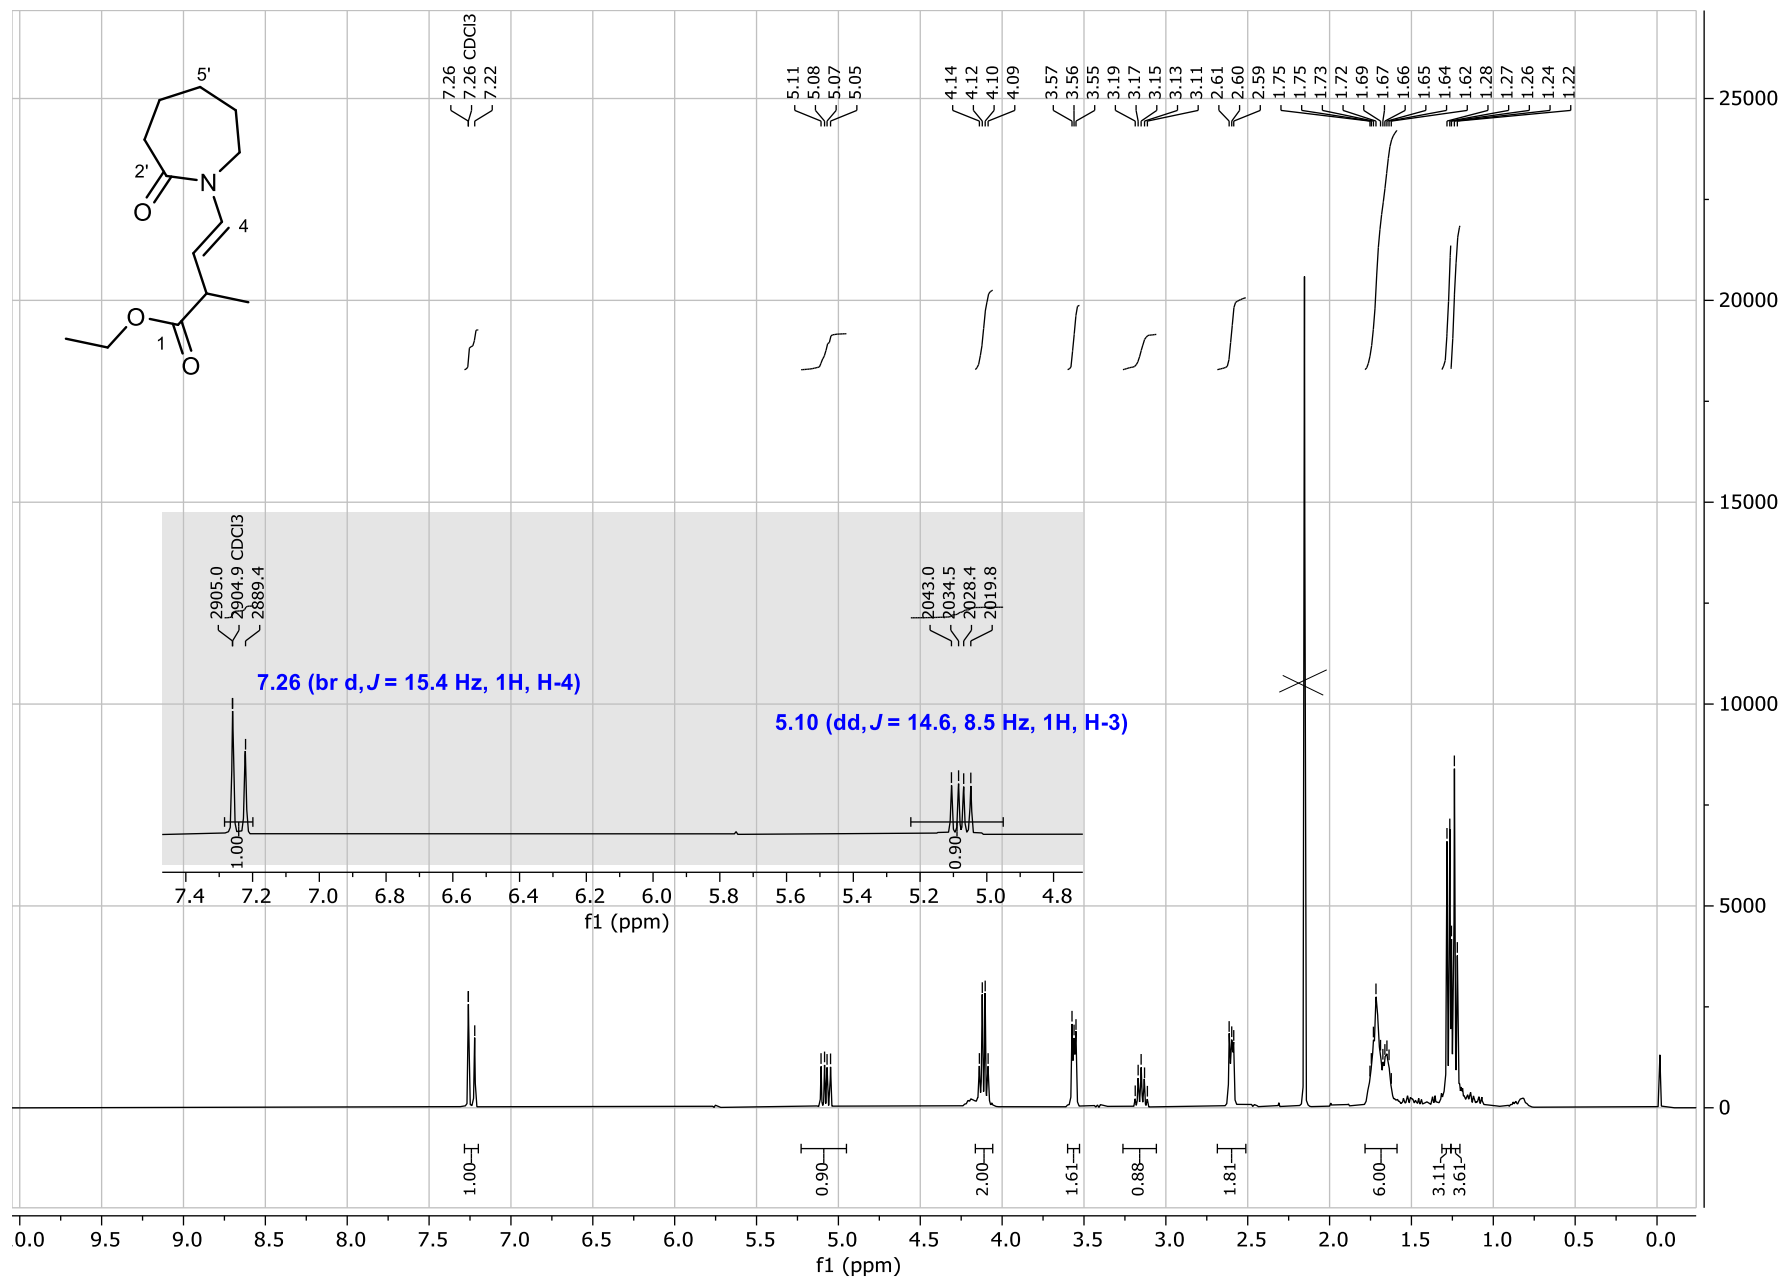

$^{13}\text{C}$  NMR (101 MHz,  $\text{CDCl}_3$ ) Spectrum of Compound 3p.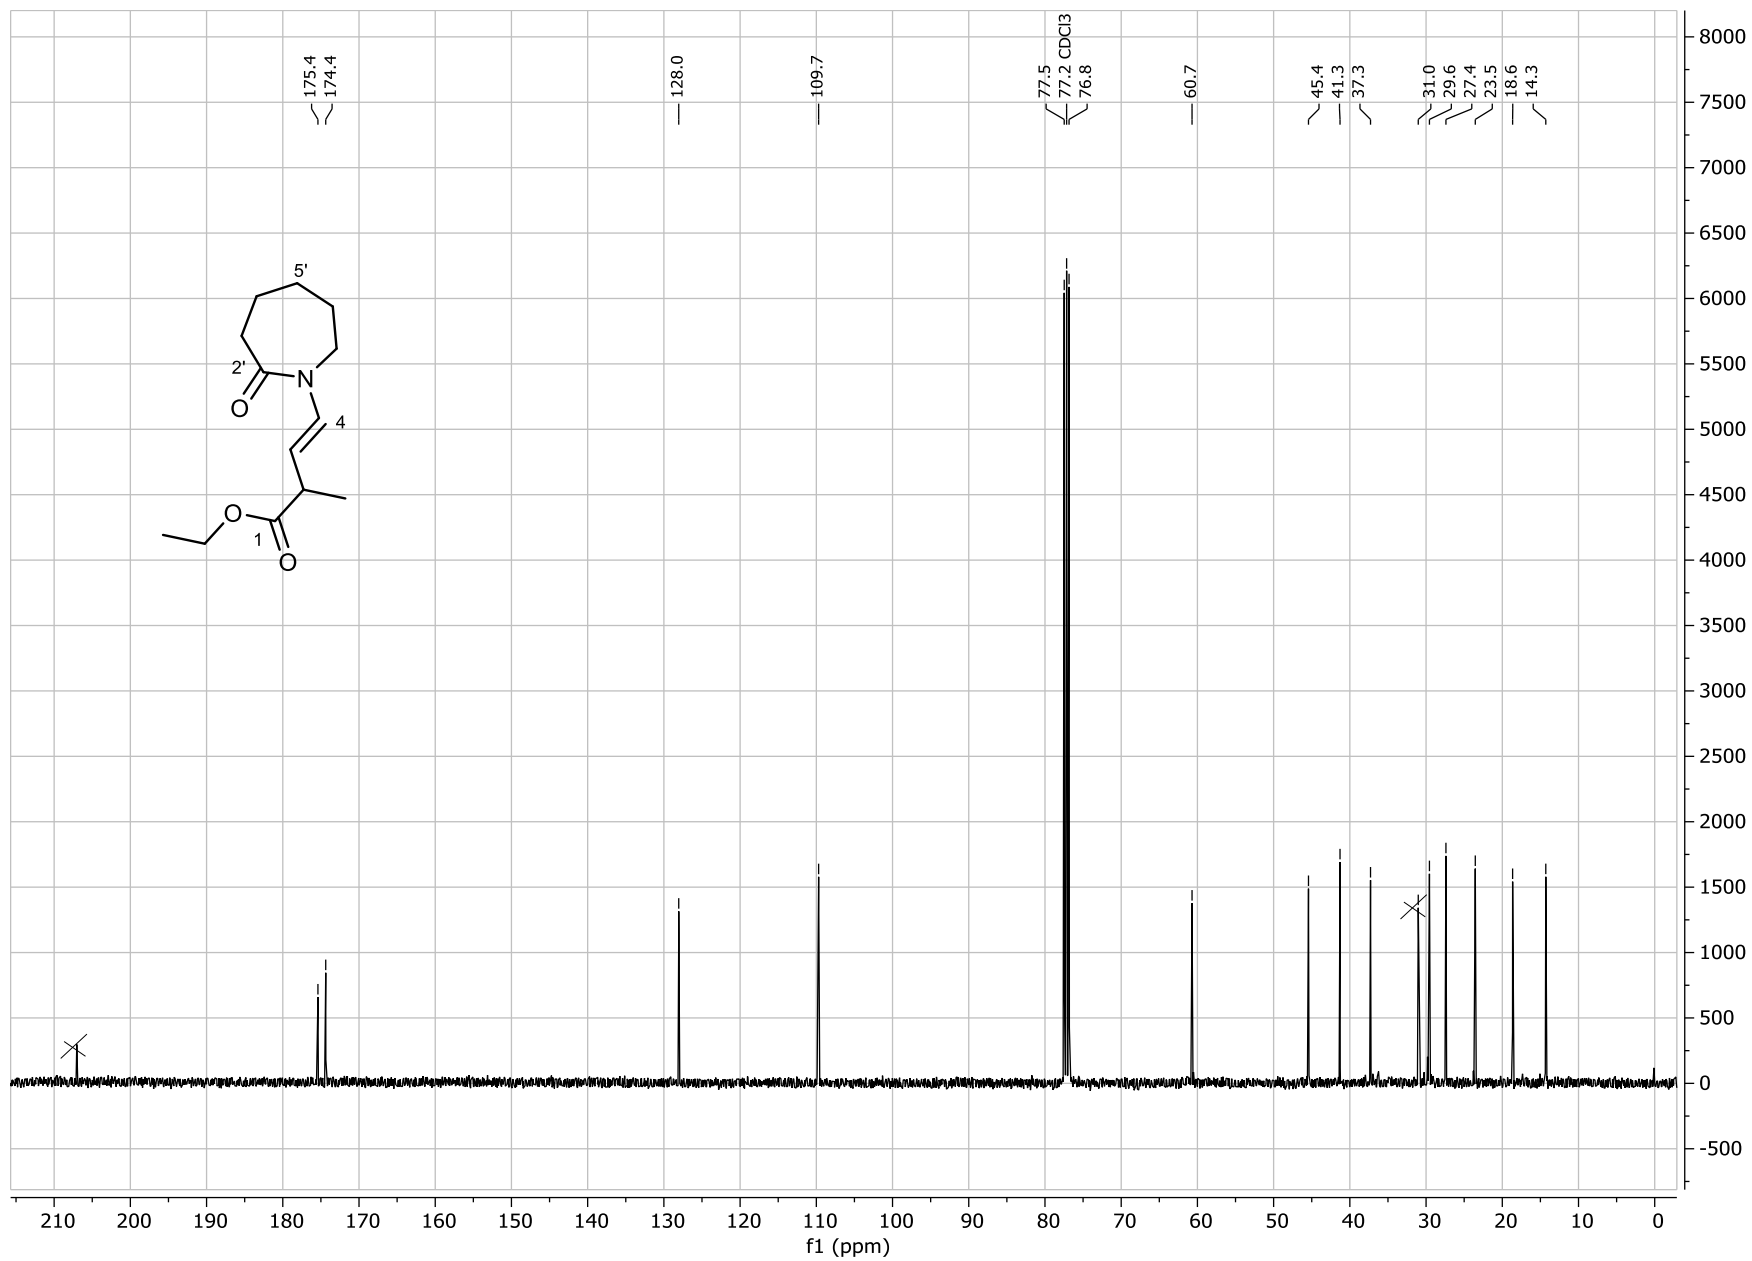



$^1\text{H}$  NMR (400 MHz,  $\text{CDCl}_3$ ) Spectrum of Compound 3q.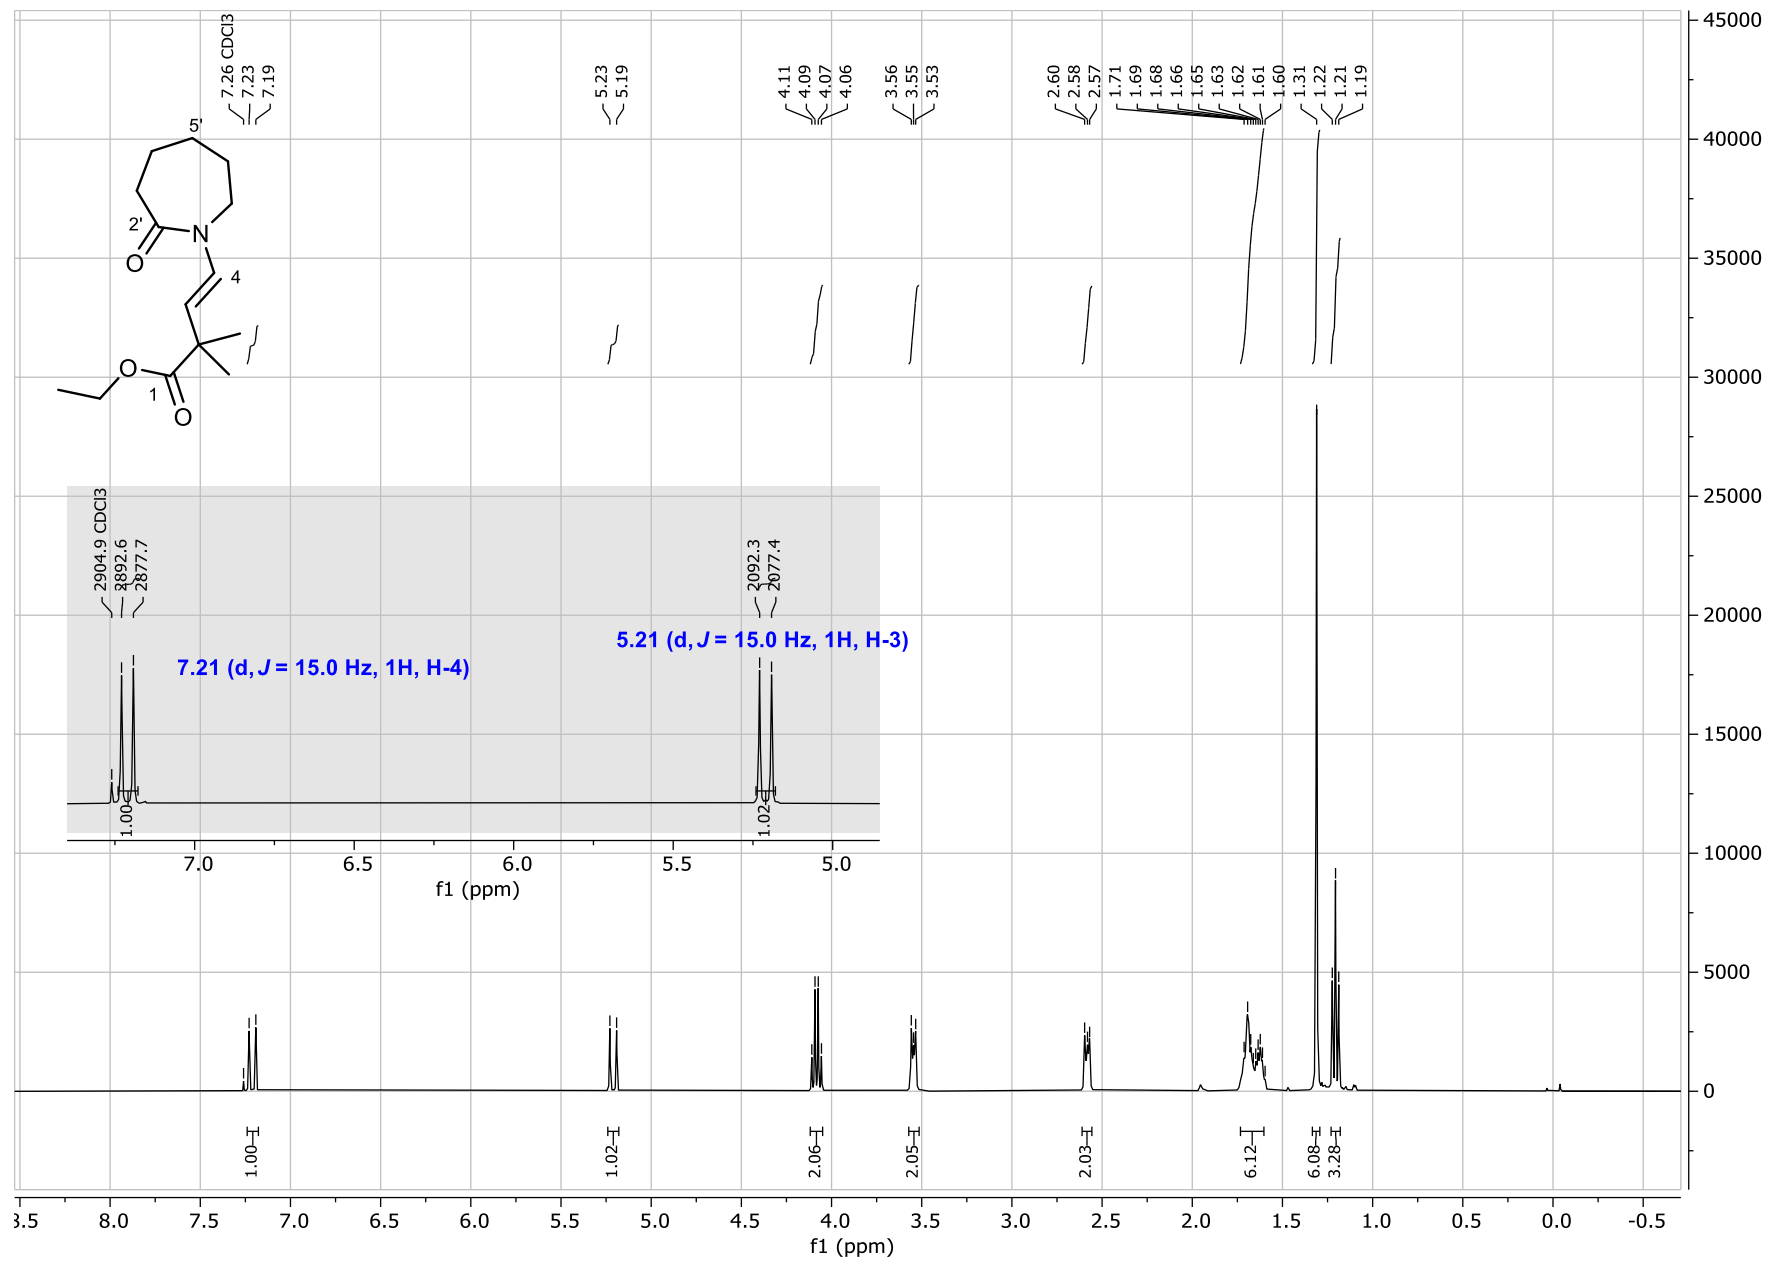

$^{13}\text{C}$  NMR (101 MHz,  $\text{CDCl}_3$ ) Spectrum of Compound 3q.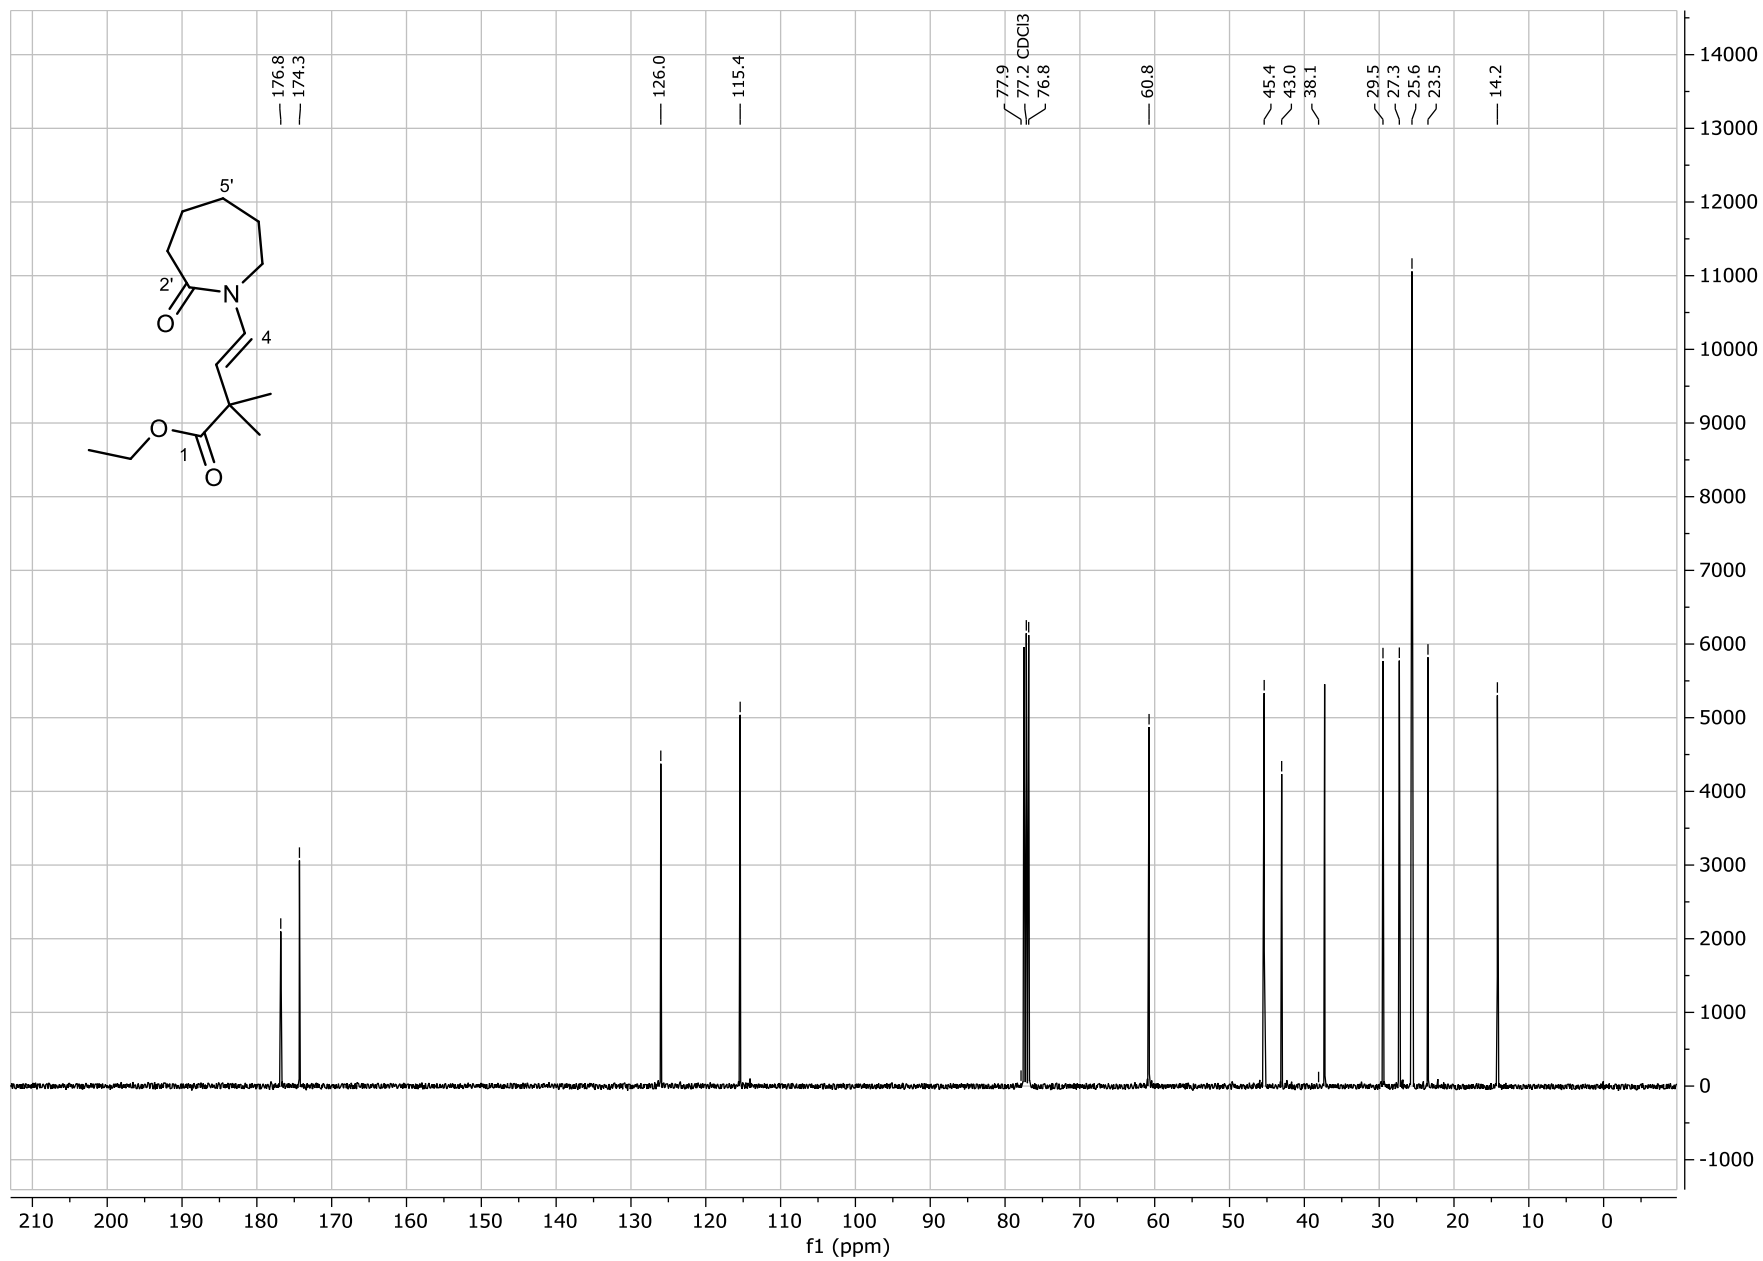

$^1\text{H}$  NMR (400 MHz,  $\text{CDCl}_3/\text{TMS}$ ) Spectrum of Compound 3r.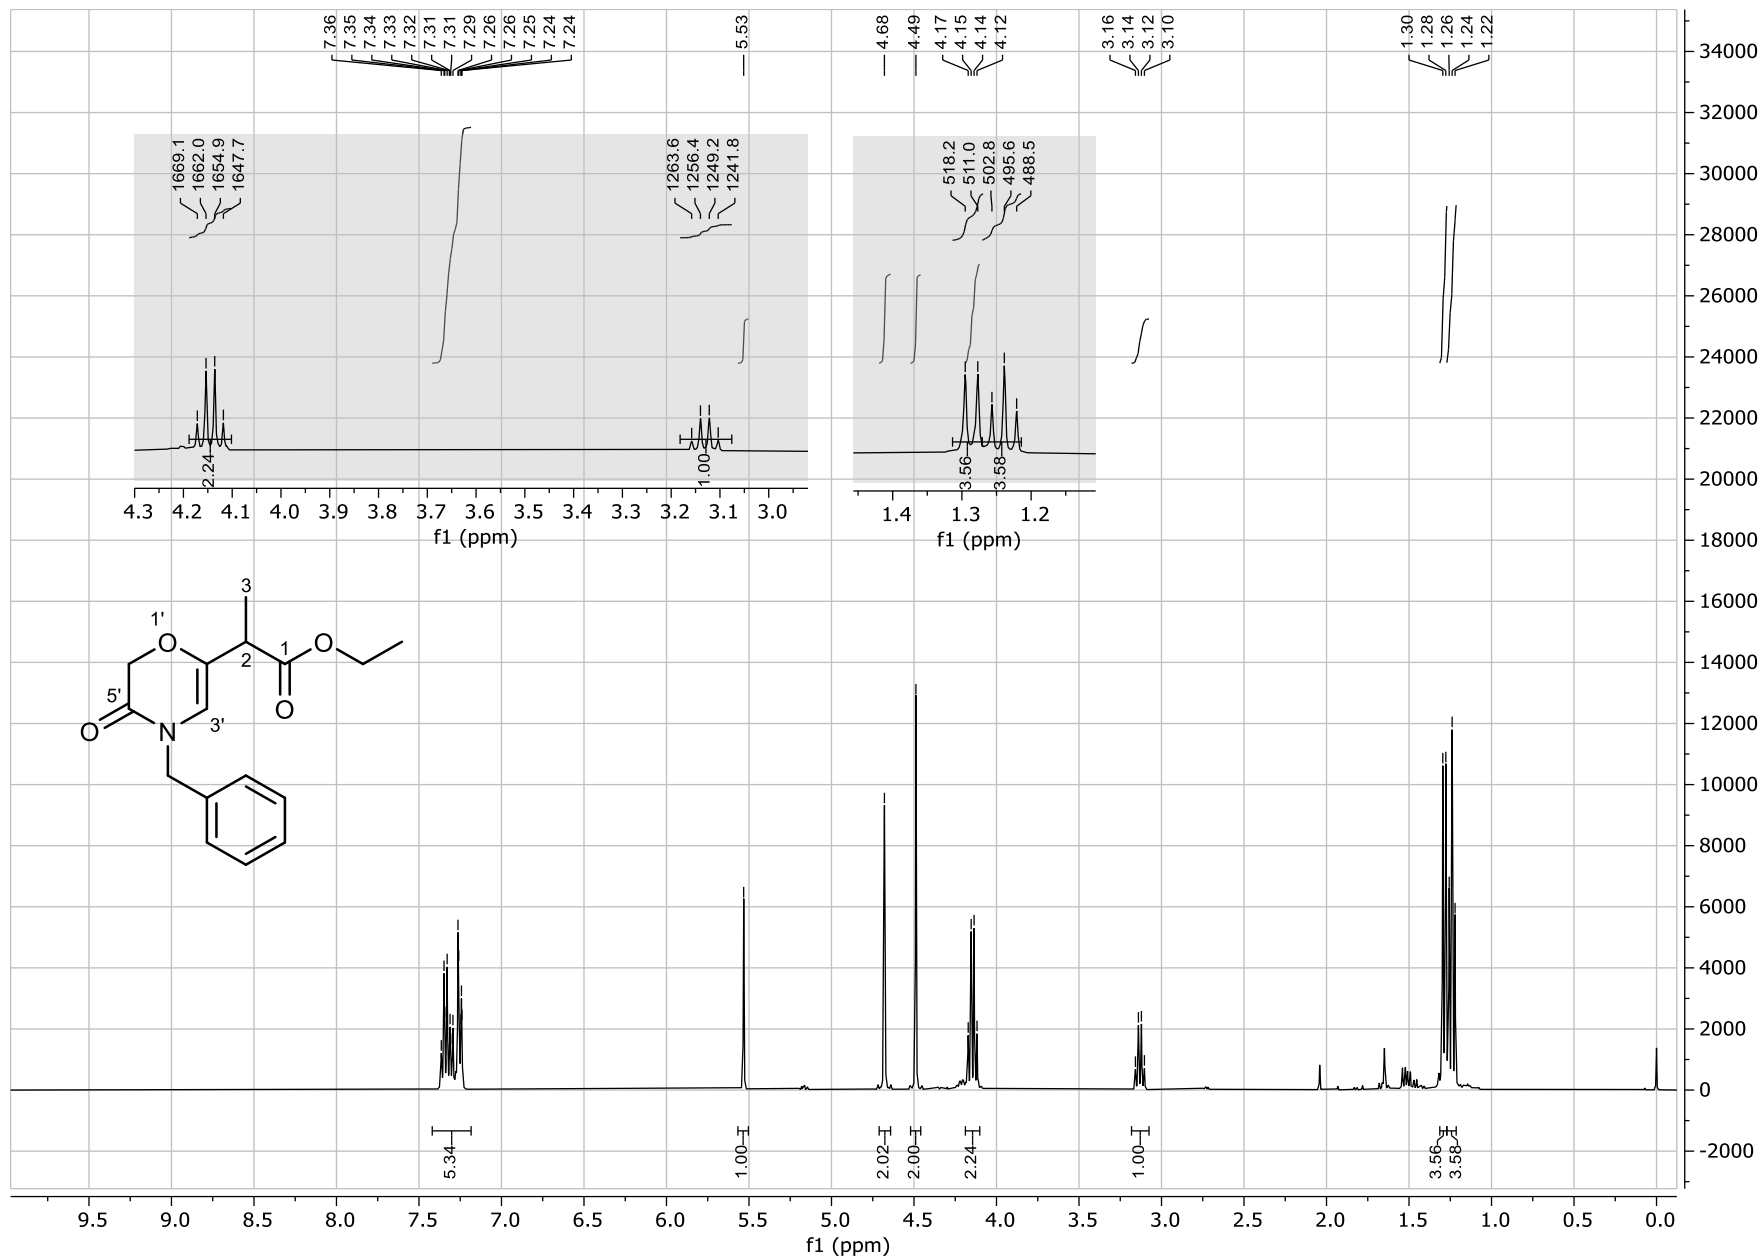

$^{13}\text{C}$  NMR (101 MHz,  $\text{CDCl}_3$ ) Spectrum of Compound 3r.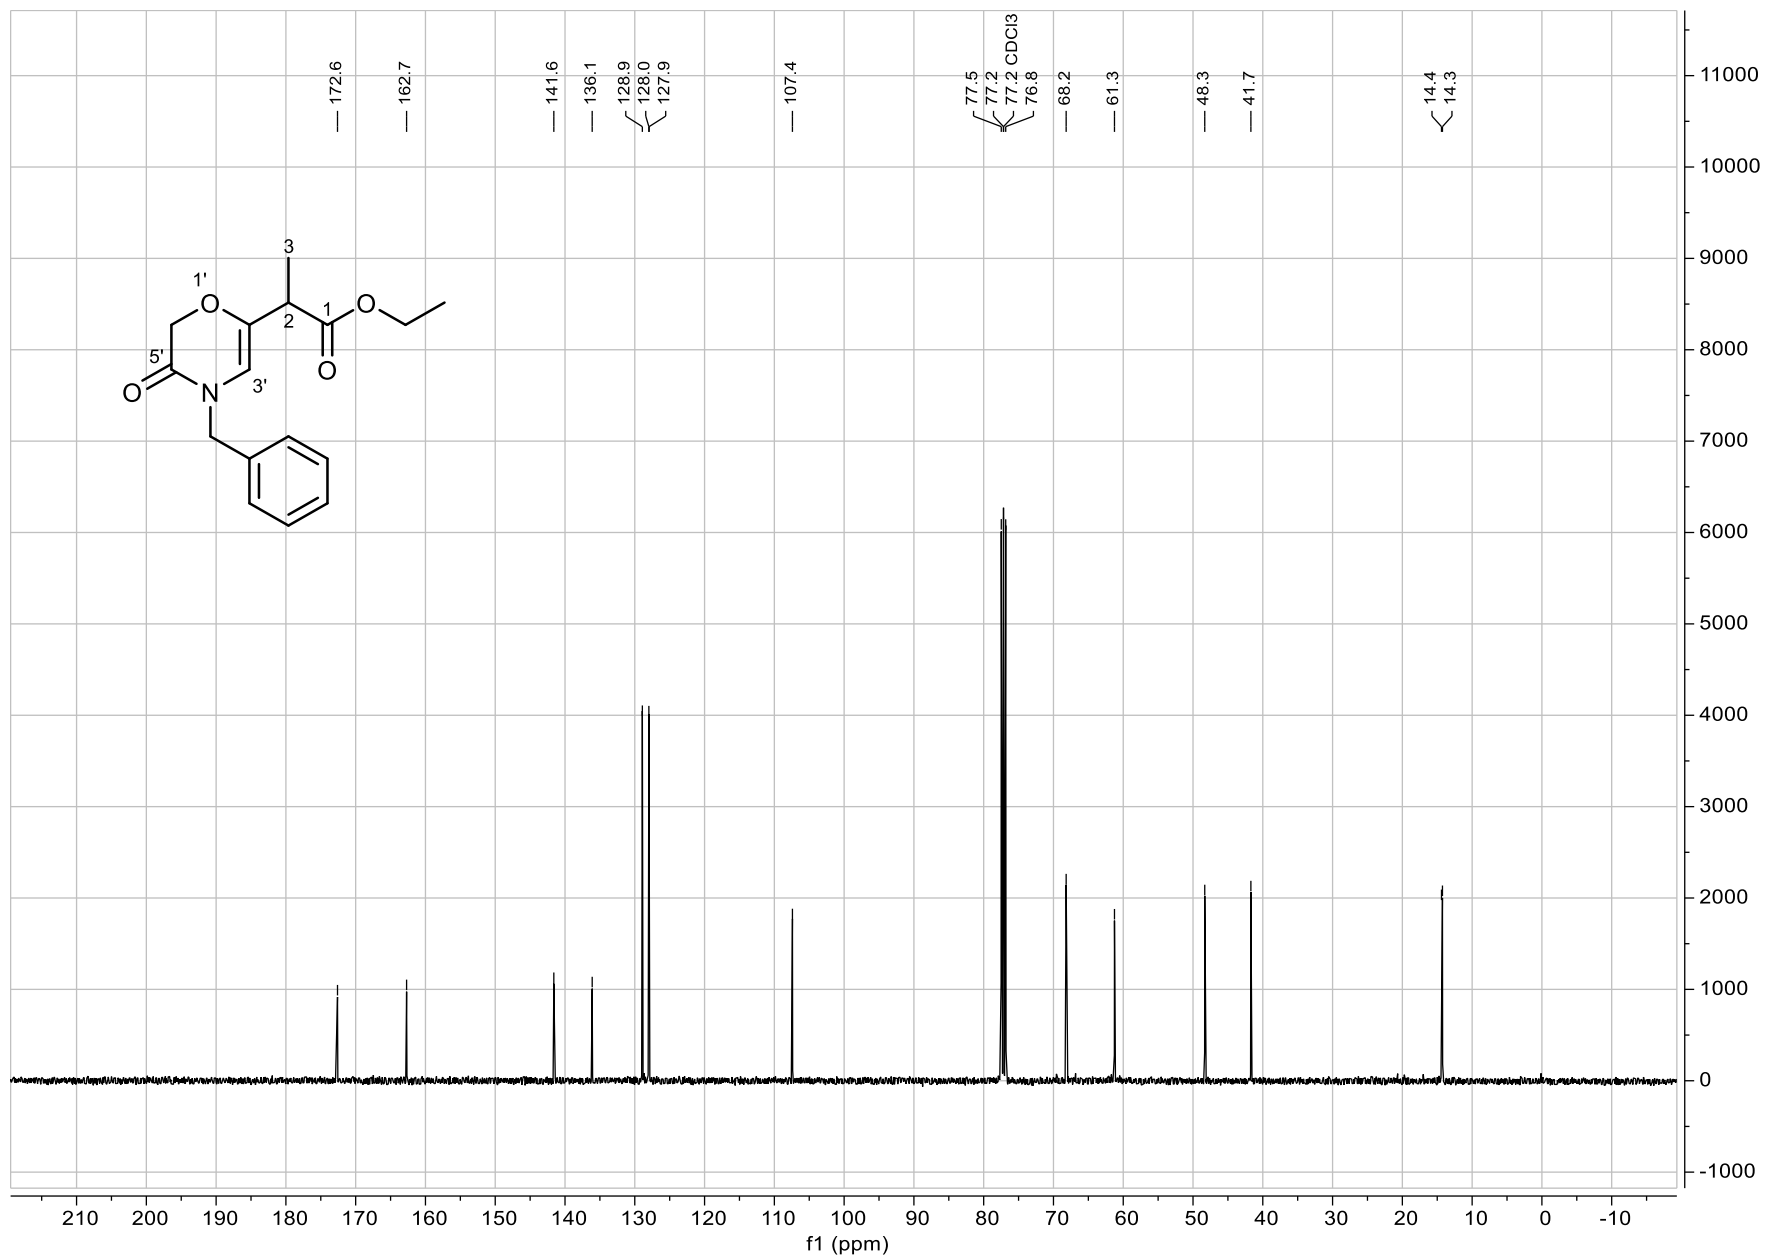

$^1\text{H}$  NMR (400 MHz,  $\text{CDCl}_3/\text{TMS}$ ) Spectrum of Compound 3s.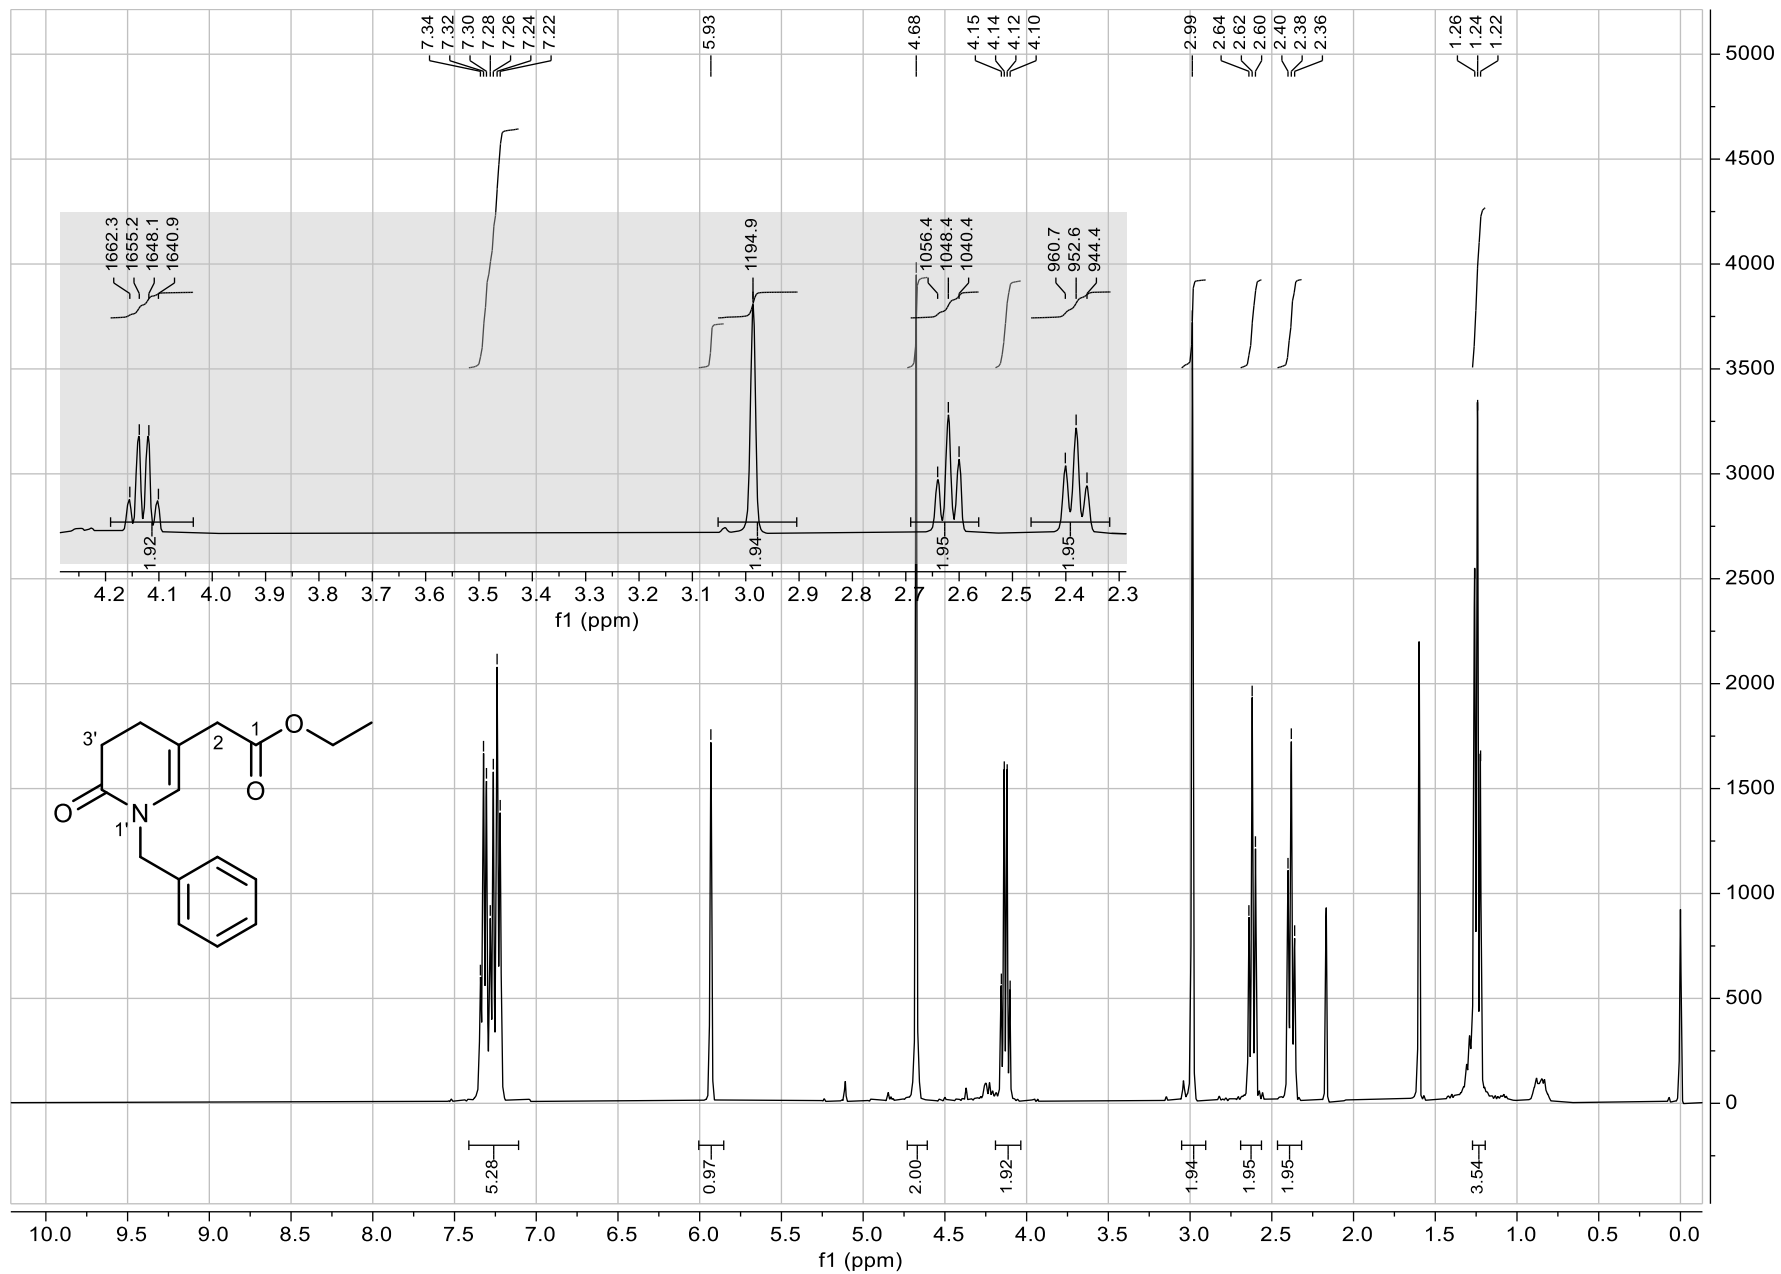

**$^{13}\text{C}$  NMR (101 MHz,  $\text{CDCl}_3$ ) Spectrum of Compound 3s.**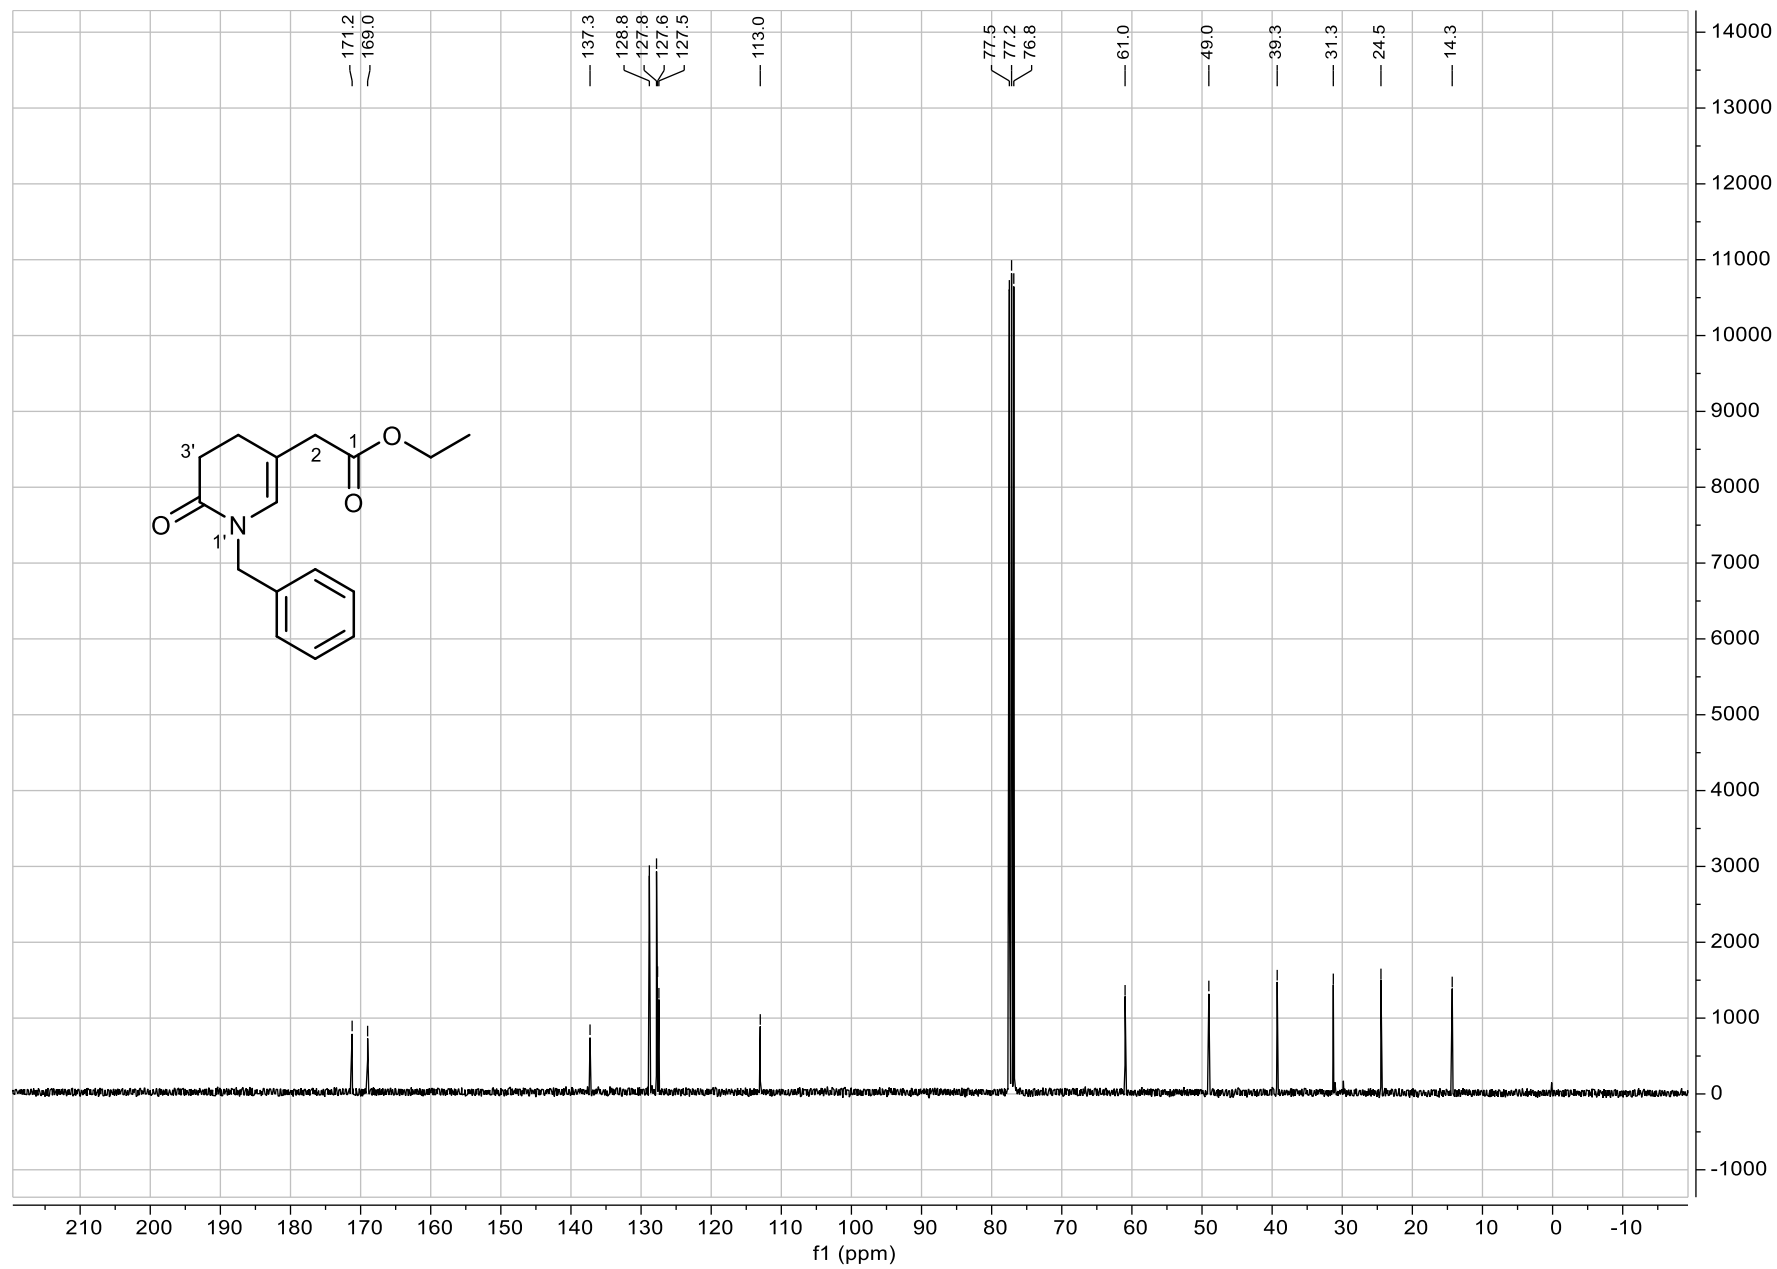

$^1\text{H}$  NMR (400 MHz,  $\text{CDCl}_3/\text{TMS}$ ) Spectrum of Compound 3t.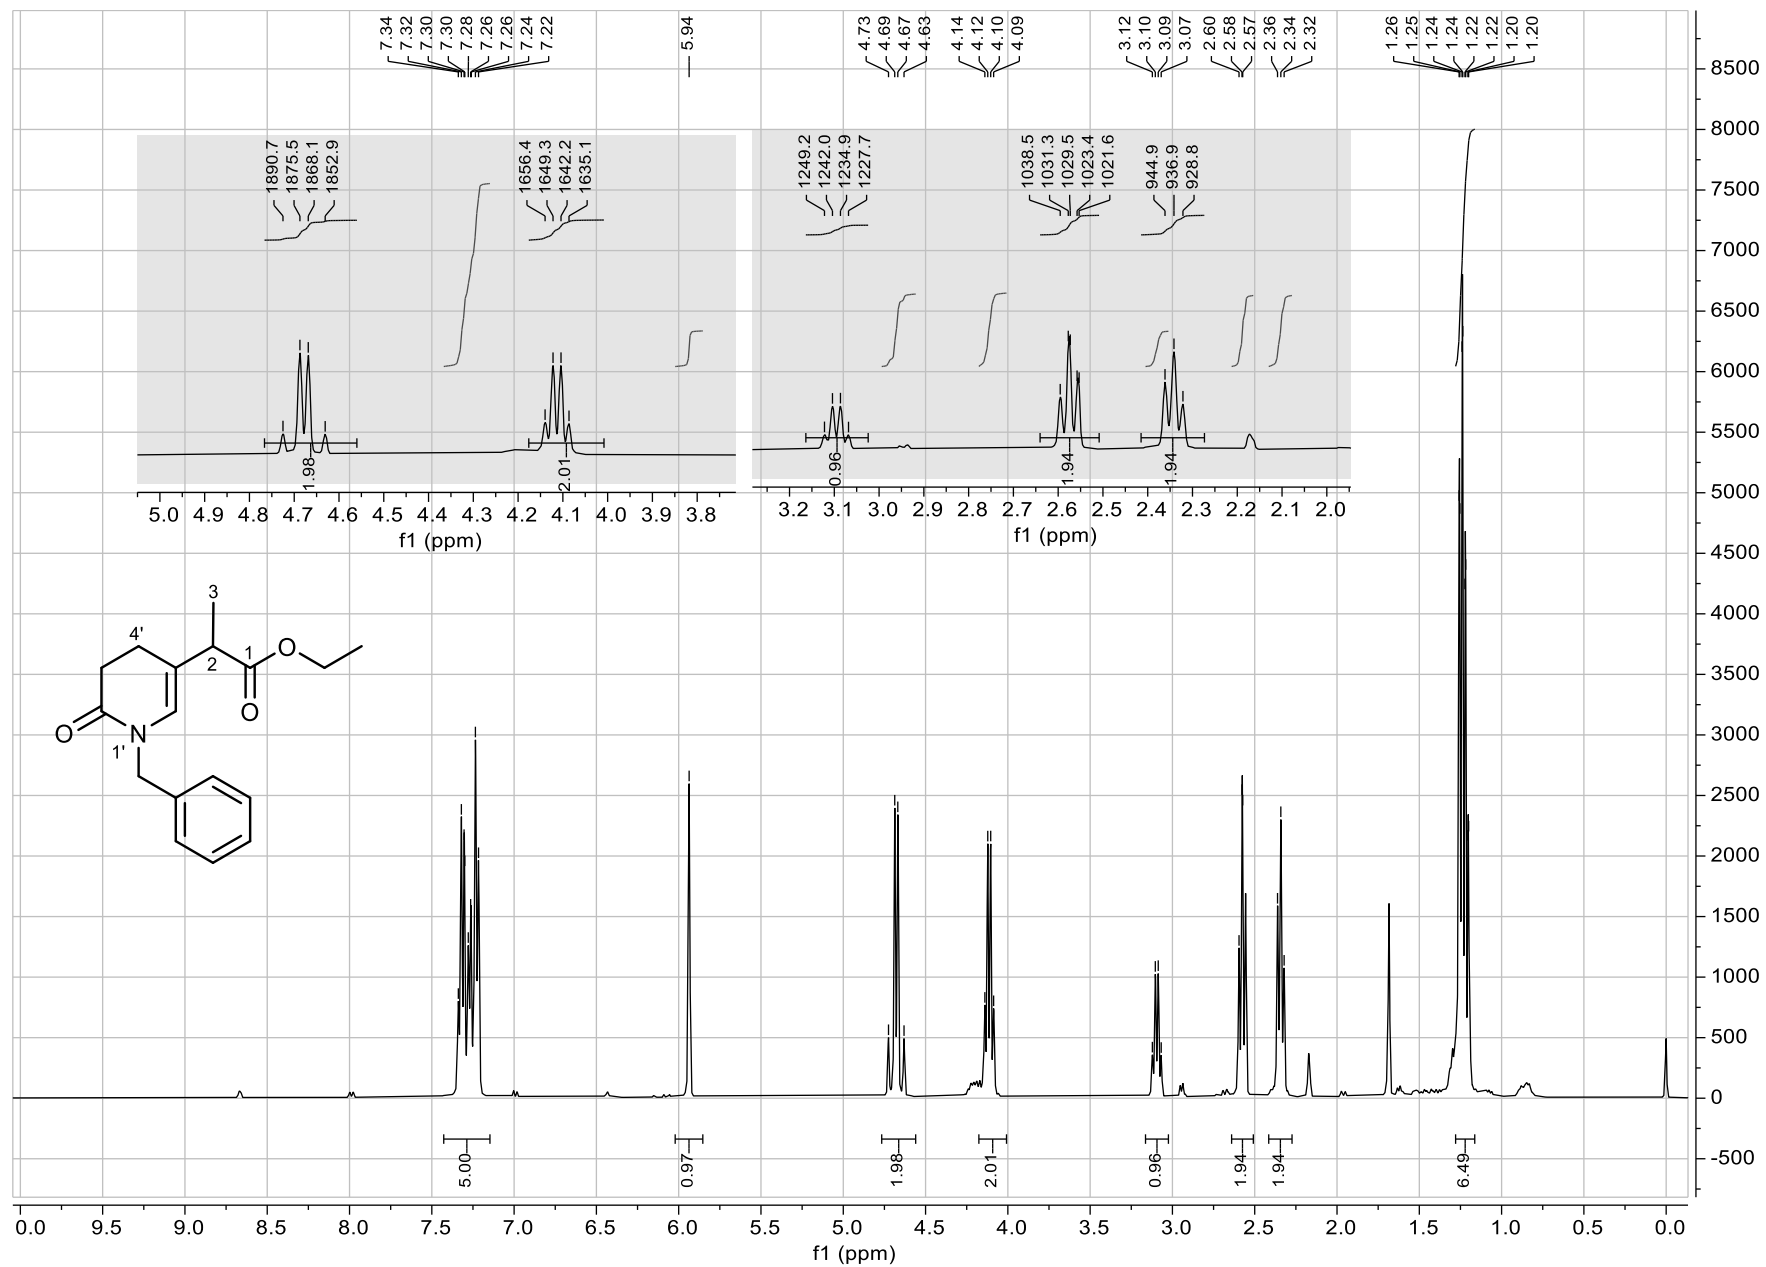

**$^{13}\text{C}$  NMR (101 MHz,  $\text{CDCl}_3$ ) Spectrum of Compound 3t.**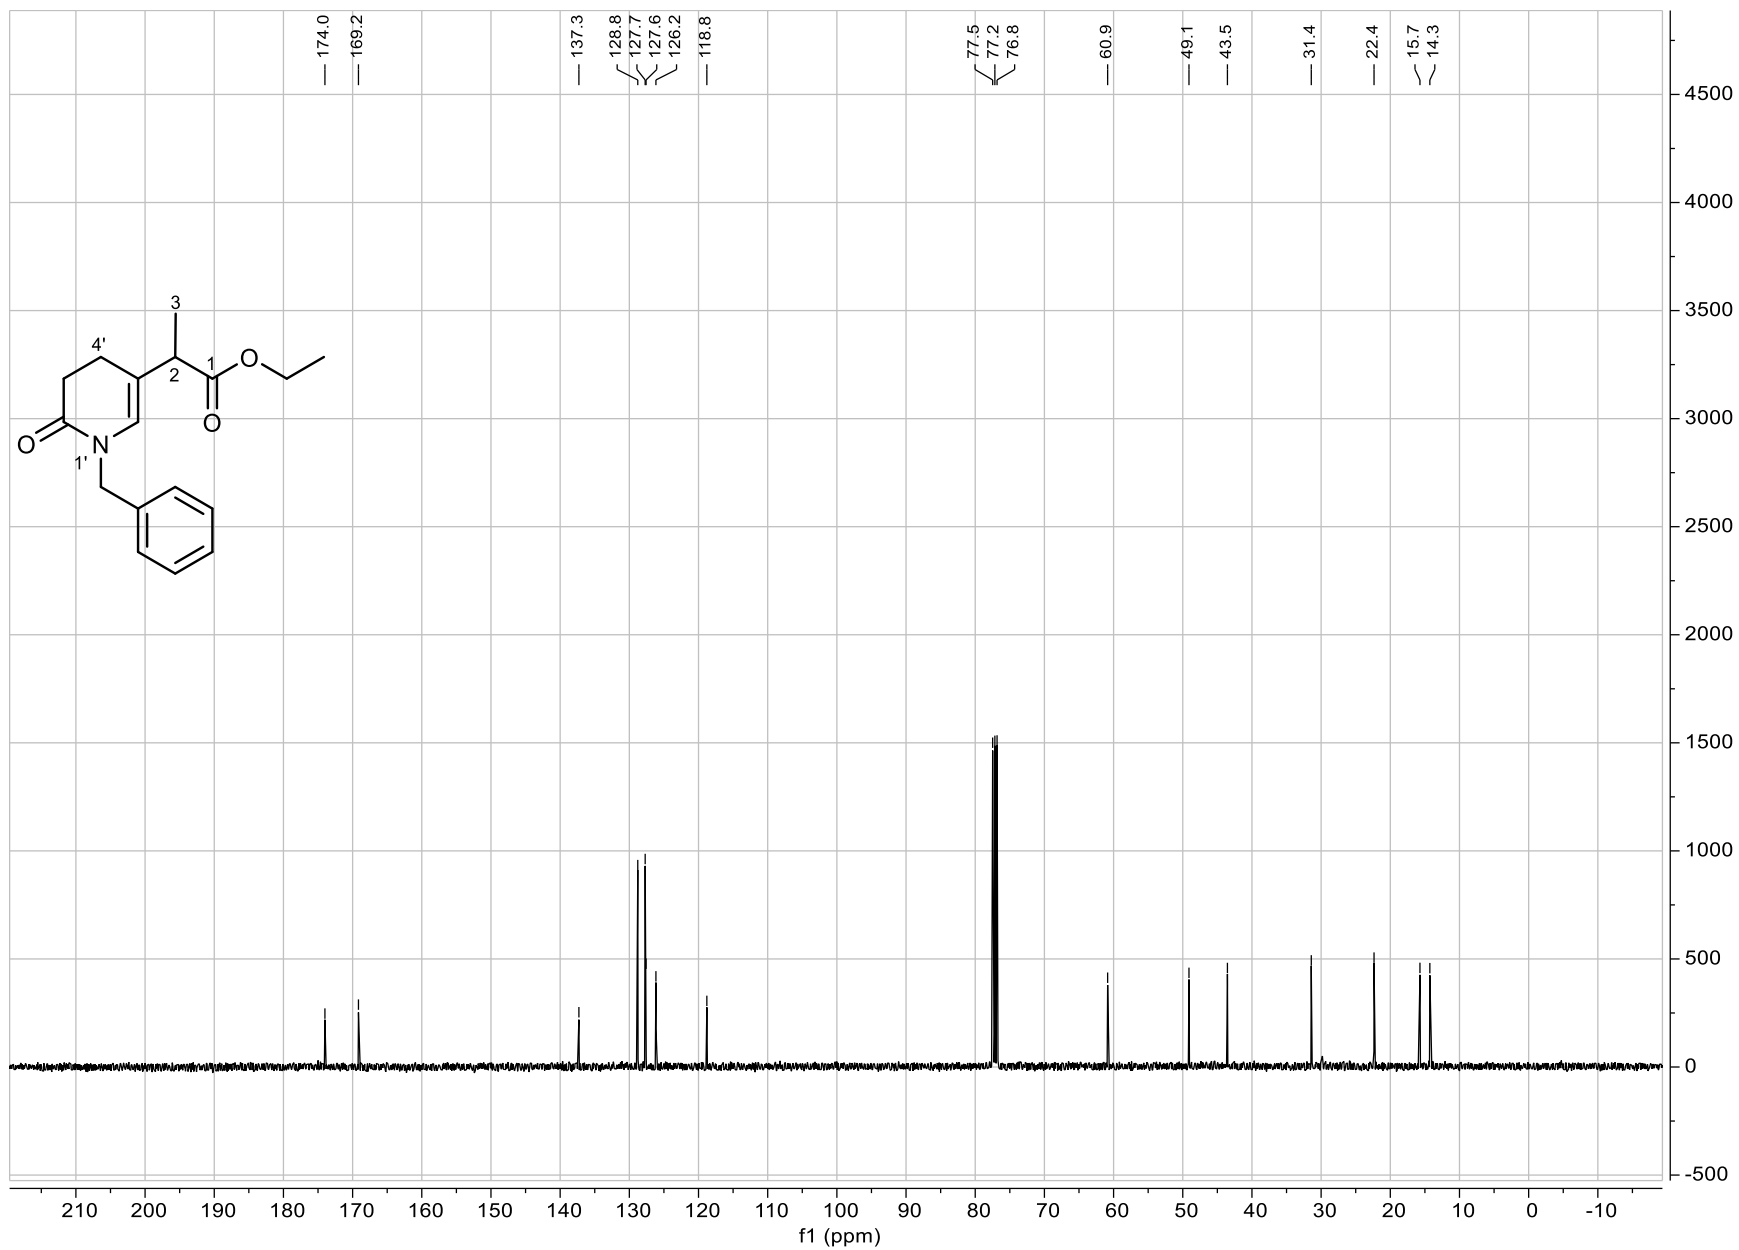



$^1\text{H}$  NMR (400 MHz,  $\text{CDCl}_3/\text{TMS}$ ) Spectrum of Compound 3u.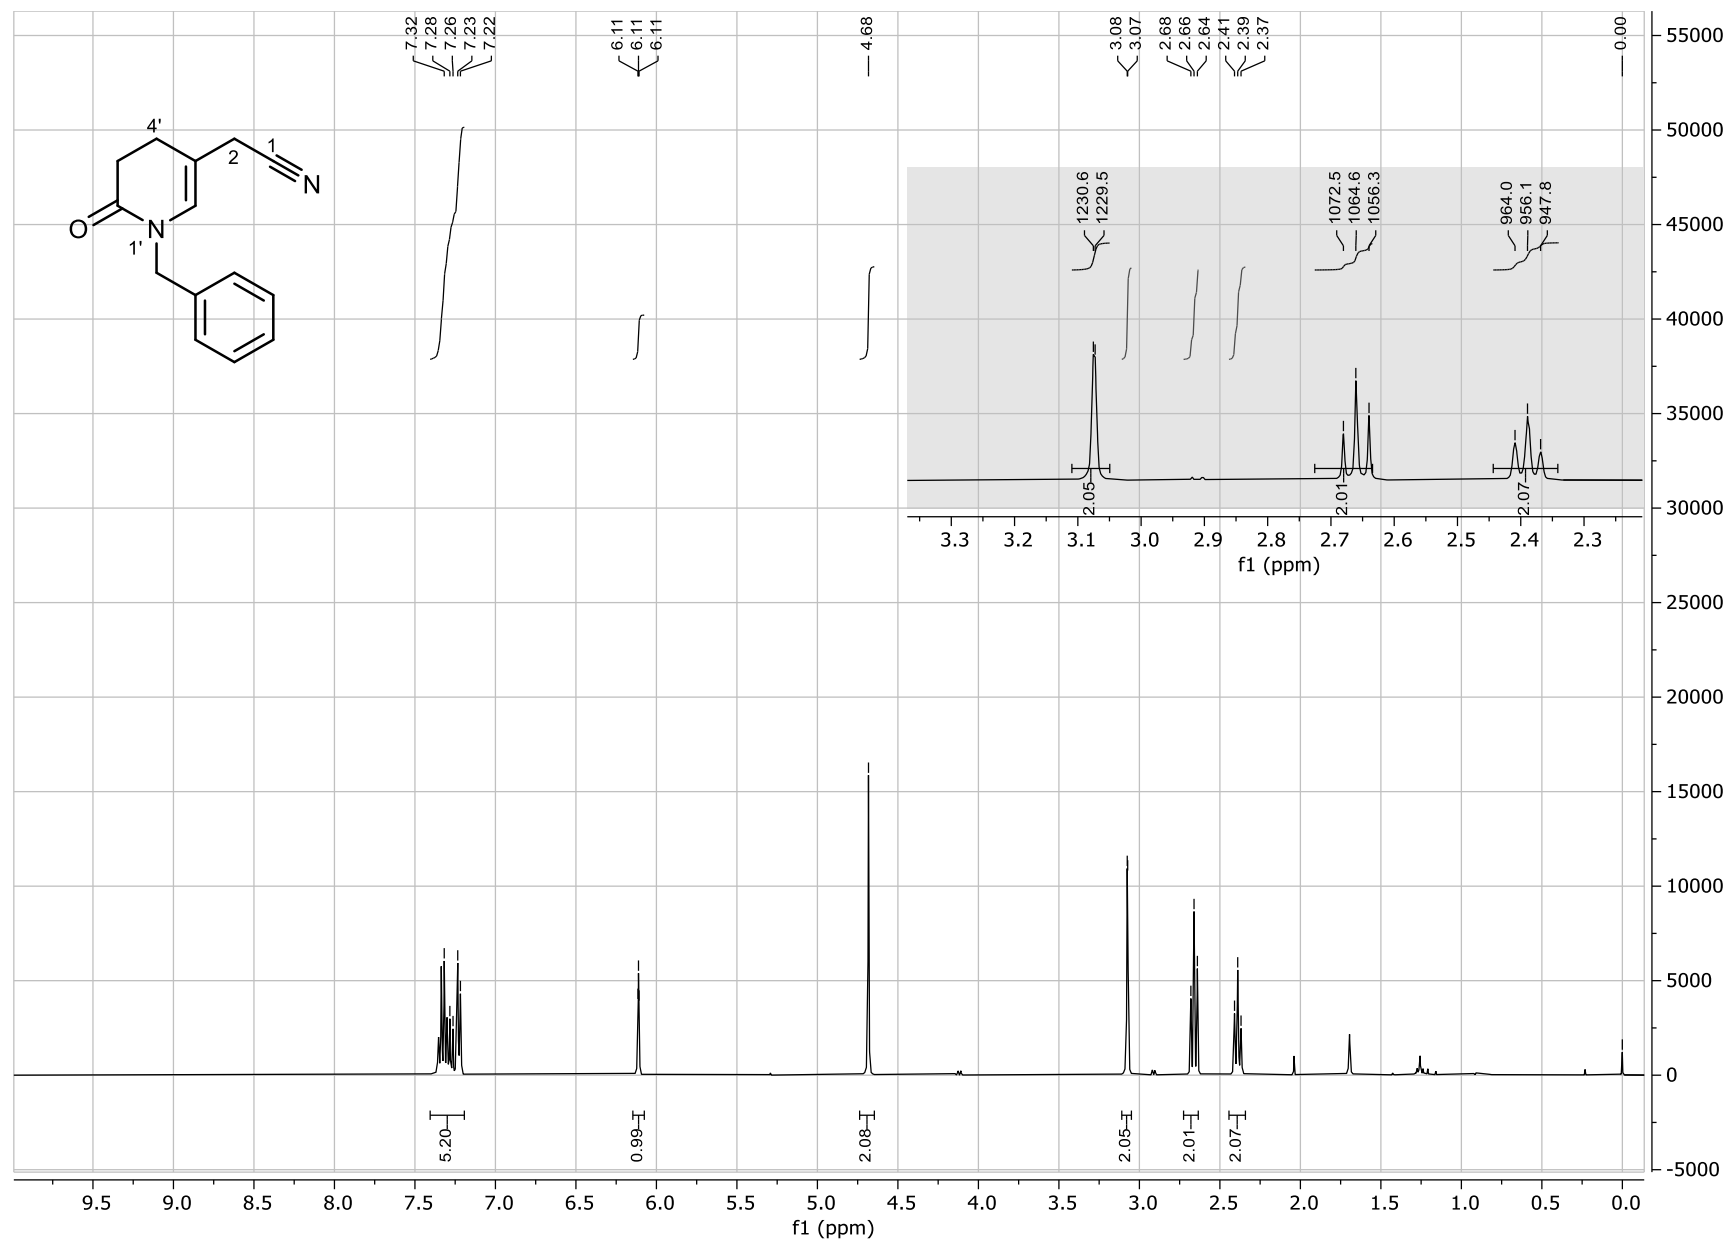

$^{13}\text{C}$  NMR (101 MHz,  $\text{CDCl}_3$ ) Spectrum of Compound 3u.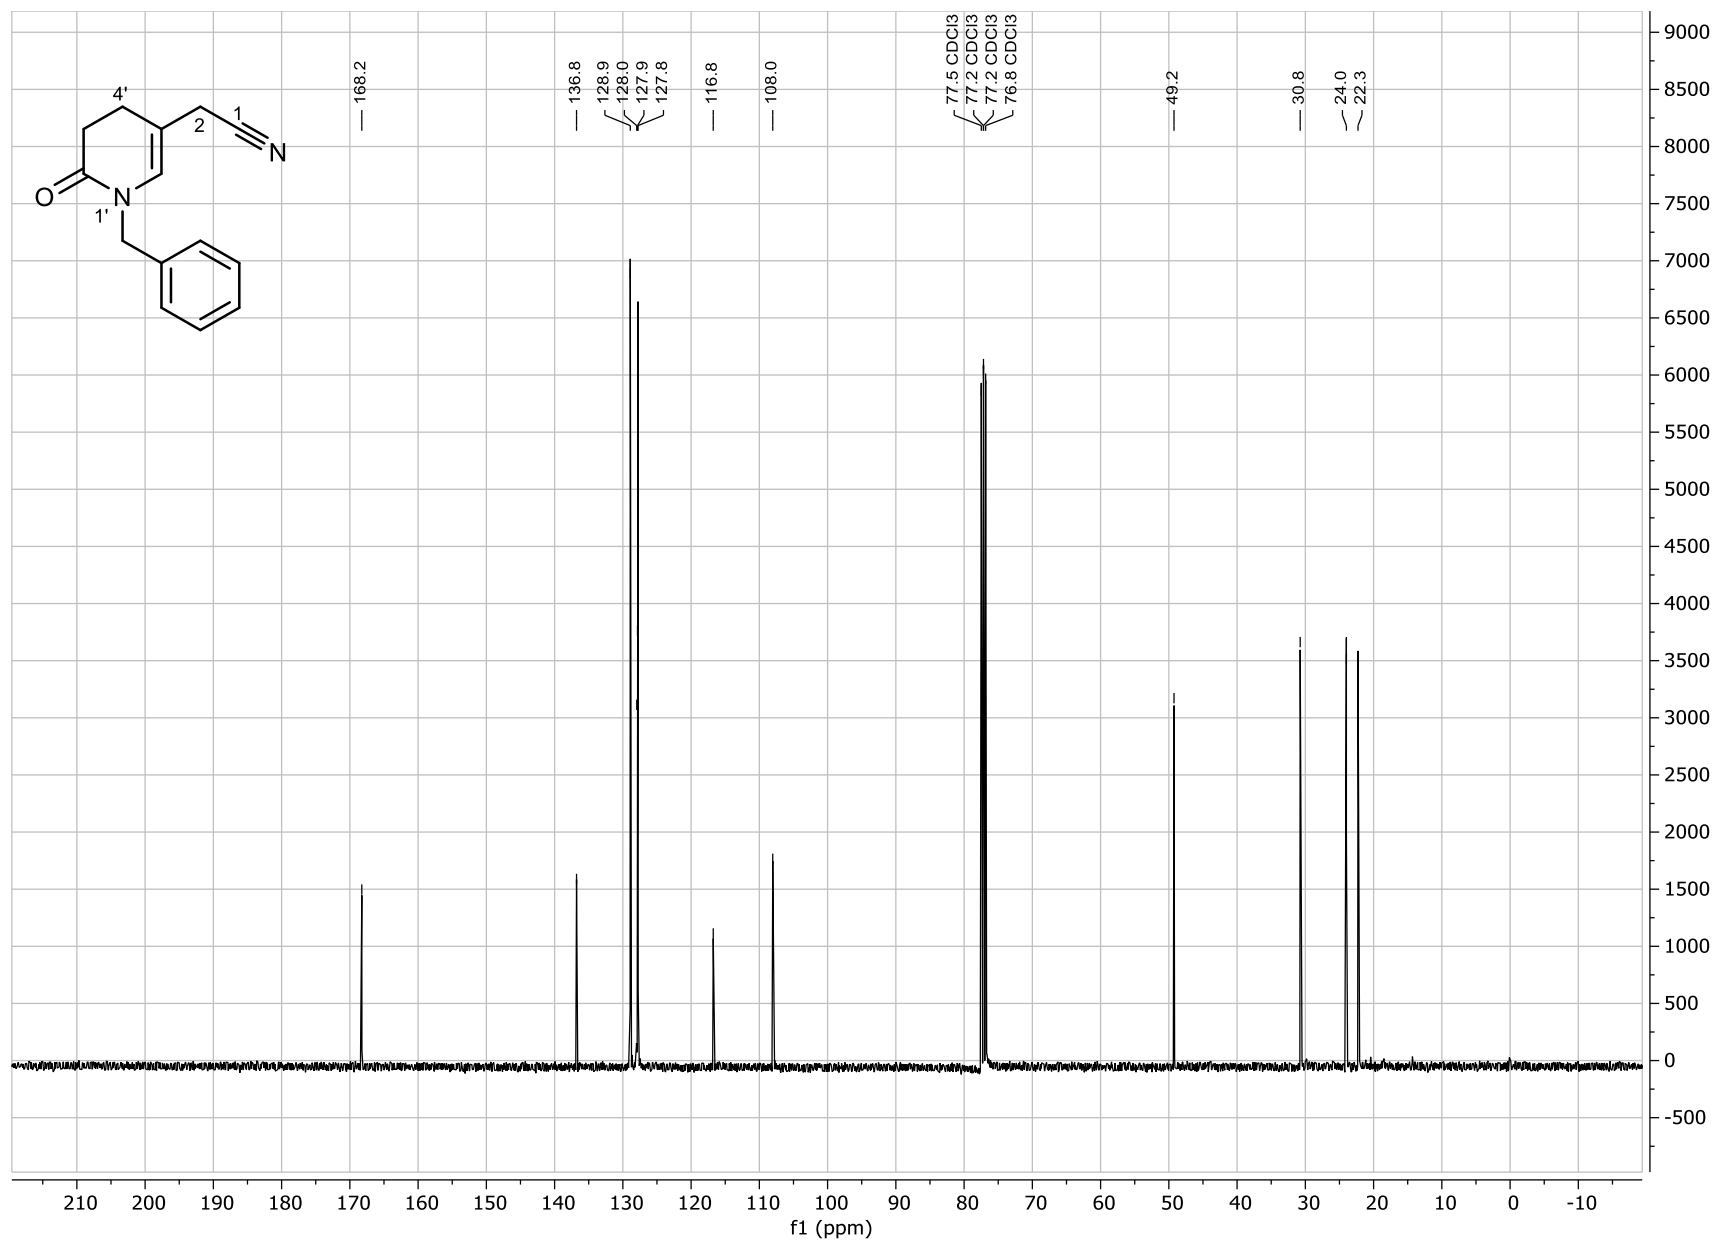

$^1\text{H}$  NMR (400 MHz,  $\text{CDCl}_3$ ) Spectrum of Compound 3v.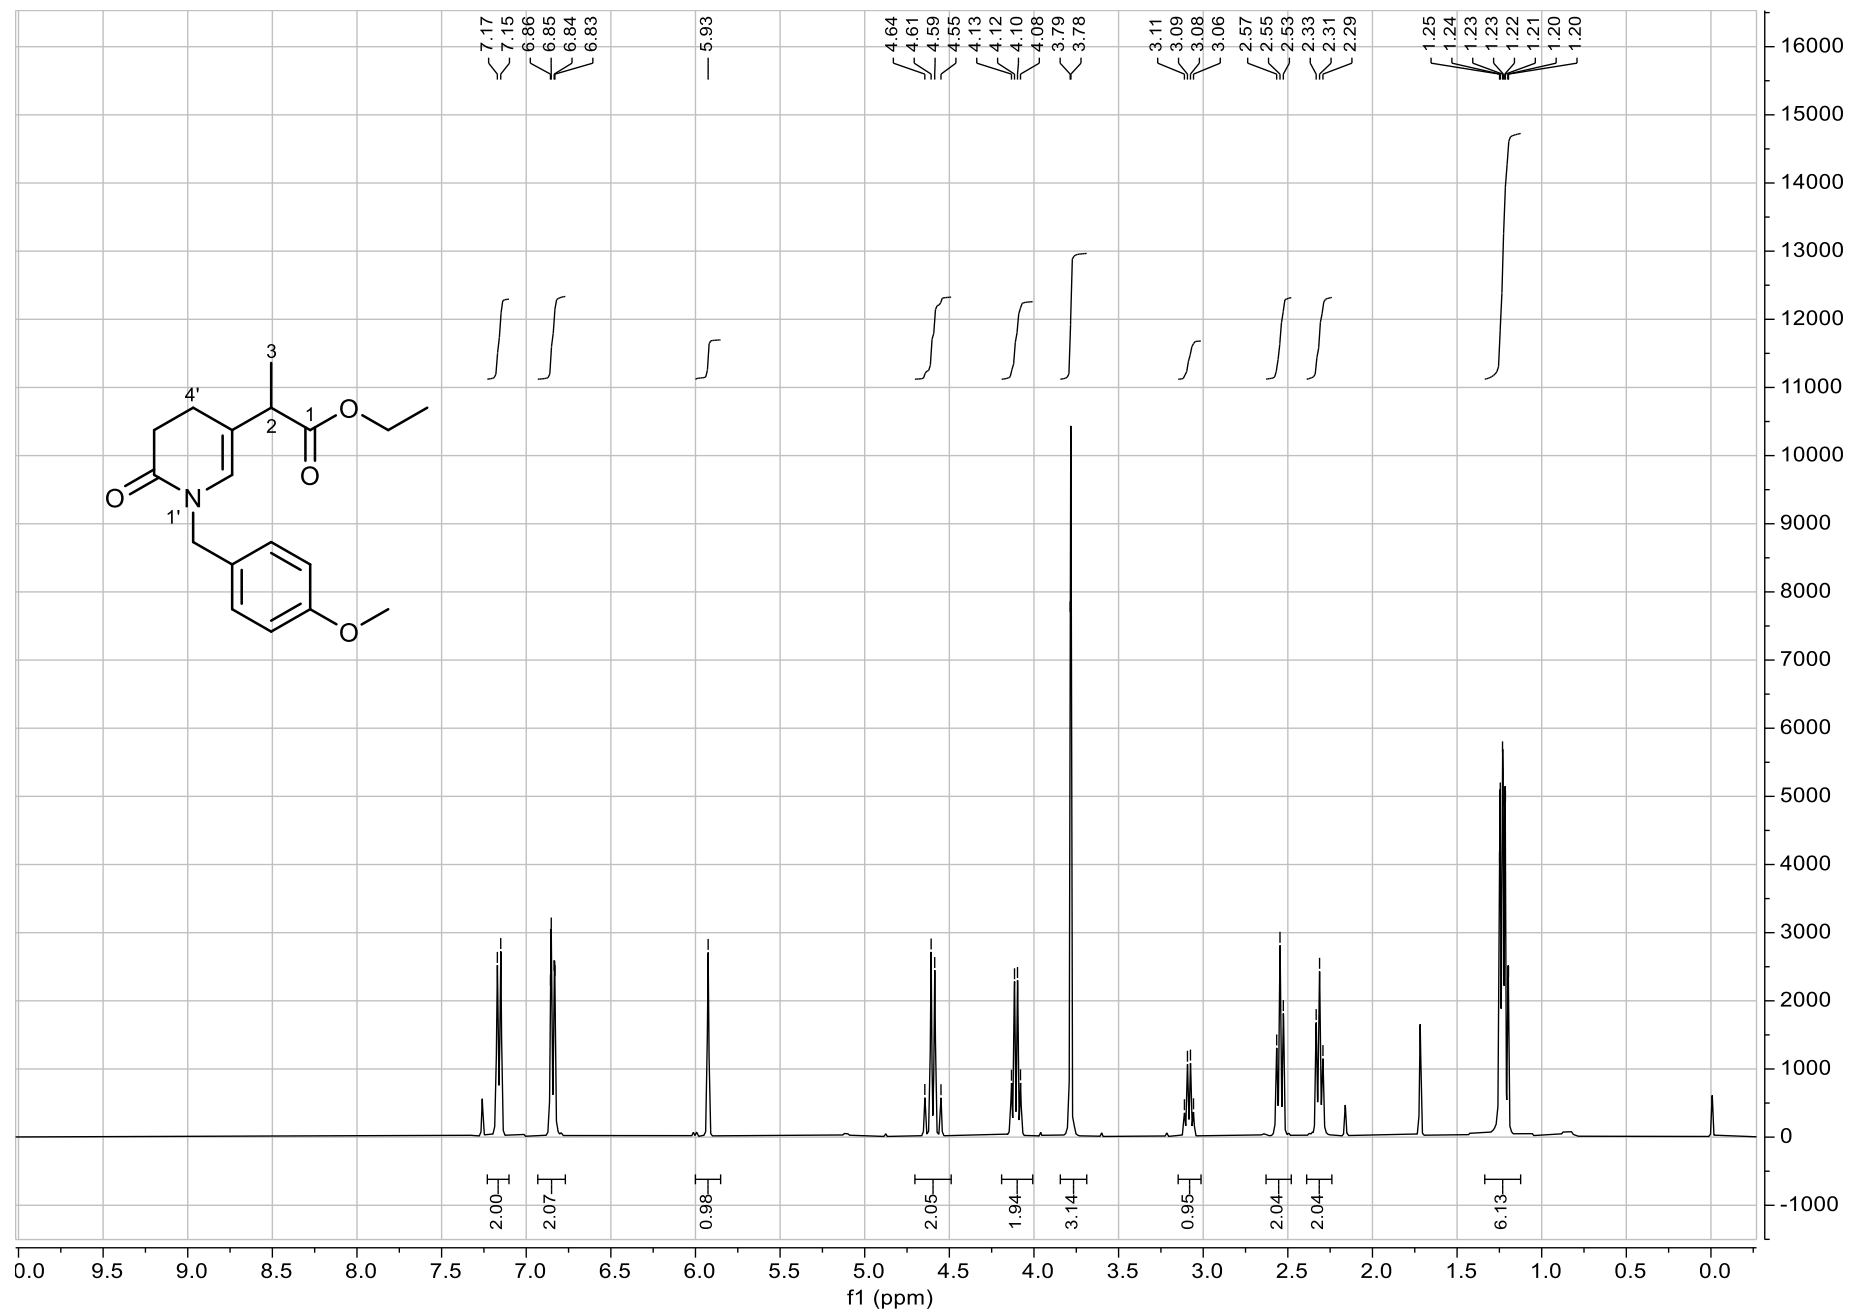

$^{13}\text{C}$  NMR (101 MHz,  $\text{CDCl}_3$ ) Spectrum of Compound 3v.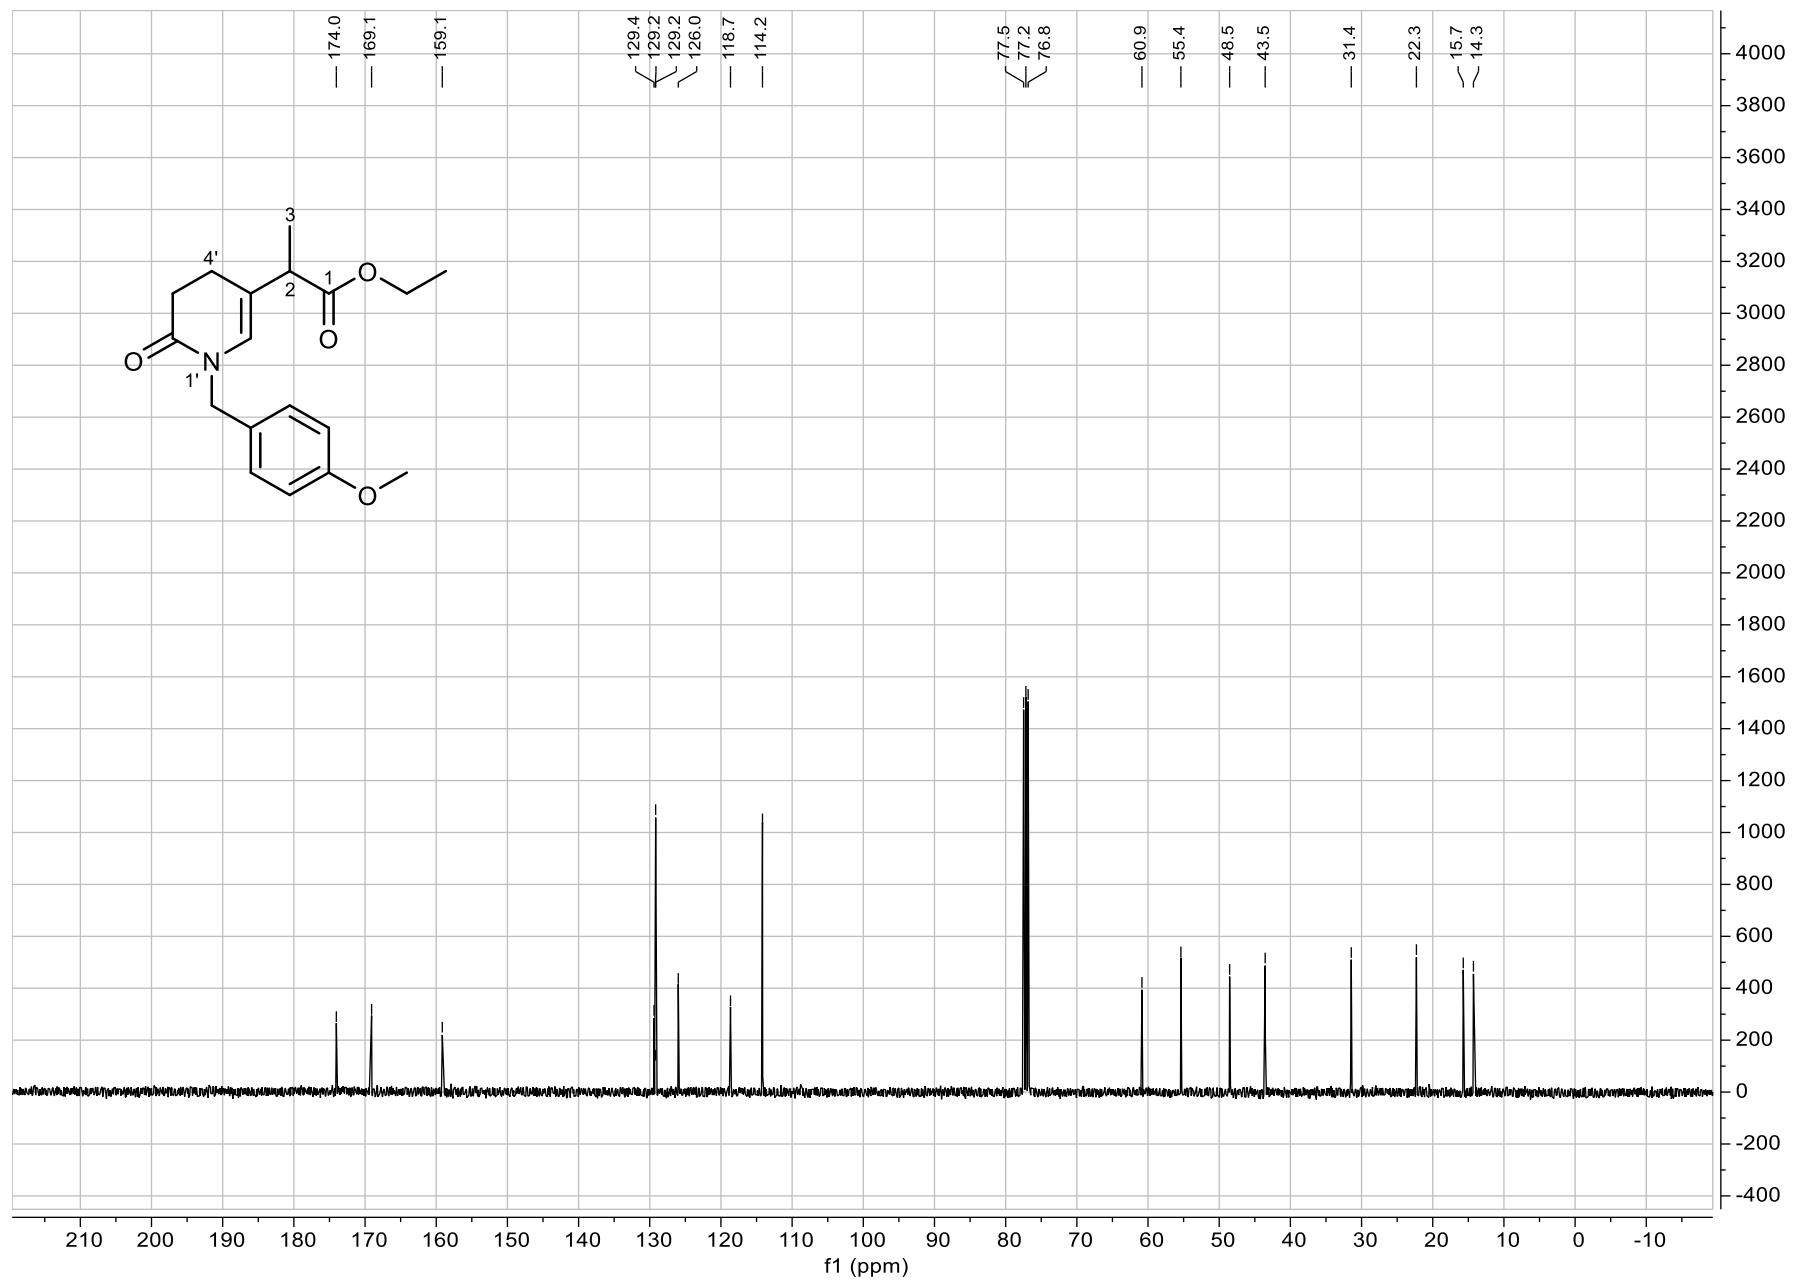

Supplement: d1nj03673d1.pdf [file d1nj03673d1.pdf]
